# Supplementary material for: Delineating the early transcriptional specification of the mammalian trachea and esophagus
Source: eLife. 2020 Jun 9;9:e55526. doi: 10.7554/eLife.55526 (PMC7282815; doi:10.7554/eLife.55526)
Supplement: Figure 1—source data 1. [file elife-55526-fig1-data1.xlsx]

## Sheet: E10.5scRNA-seq_top20
Source Data 1. Relates to Figure 1, S1-4
E10.5 Top 20 markers of each cell cluster identified by RNAseq Seurat V3, FindAllMarkers, only.pos=T, min.pct=0.25, logfc.threshold=0.25
cluster	gene	p_val	avg_logFC	pct.1	pct.2	p_val_adj
Lung	Dlk1	0	1.4796	0.932	0.453	0
Lung	Slc2a3	0	1.25532	0.953	0.523	0
Lung	Bex2	0	0.921898	0.991	0.847	0
Lung	Bex4	0	0.919394	1	0.989	0
Lung	Crlf1	0	0.883062	0.981	0.428	0
Lung	Sox9	0	0.824827	0.921	0.457	0
Lung	Id2	0	0.714194	0.998	0.944	0
Lung	Epha4	0	0.662106	0.817	0.278	0
Lung	Tgfb2	0	0.647632	0.936	0.553	0
Lung	Wnt7b	0	0.637522	0.974	0.52	0
Lung	Sftpb	0	0.628365	0.602	0.051	0
Lung	Atox1	0	0.542525	0.997	0.982	0
Lung	Actr3	0	0.514125	0.975	0.857	0
Lung	Calm1	0	0.494422	1	0.998	0
Lung	Etv5	2.86453e-303	0.530435	0.944	0.503	4.55488e-299
Lung	Oat	3.97612e-303	0.542081	0.92	0.599	6.32243e-299
Lung	Meg3	2.97905e-274	0.672765	0.99	0.847	4.73698e-270
Lung	Ccnd1	8.10366e-269	0.519194	0.987	0.695	1.28856e-264
Lung	Clu	8.89136e-233	0.500931	0.552	0.172	1.41381e-228
Lung	Apoe	3.13141e-122	0.773981	0.507	0.244	4.97925e-118
Trachea/ventral foregut	Ly6h	0	0.727635	0.861	0.46	0
Trachea/ventral foregut	Cdkn1c	0	0.692175	1	0.997	0
Trachea/ventral foregut	Nkx2-1	0	0.658718	0.986	0.619	0
Trachea/ventral foregut	Ces1d	5.36252e-294	0.501879	0.77	0.353	8.52694e-290
Trachea/ventral foregut	Irx3	7.16006e-287	0.537388	0.916	0.593	1.13852e-282
Trachea/ventral foregut	Add3	1.61165e-282	0.517936	0.899	0.626	2.56268e-278
Trachea/ventral foregut	H2-Q1	1.0294e-231	0.476606	0.49	0.137	1.63685e-227
Trachea/ventral foregut	H2-Q4	4.07209e-231	0.542653	0.883	0.657	6.47504e-227
Trachea/ventral foregut	Cldn18	1.03788e-217	0.518803	0.548	0.194	1.65033e-213
Trachea/ventral foregut	Capn6	9.19309e-216	0.43571	0.972	0.865	1.46179e-211
Trachea/ventral foregut	Emid1	3.88584e-211	0.42297	0.859	0.591	6.17887e-207
Trachea/ventral foregut	Tppp3	4.75551e-211	0.46425	0.578	0.234	7.56174e-207
Trachea/ventral foregut	Sparc	2.604e-209	0.550919	0.981	0.911	4.14061e-205
Trachea/ventral foregut	Irx1	8.55632e-207	0.459438	0.845	0.521	1.36054e-202
Trachea/ventral foregut	Irx2	6.89736e-204	0.431902	0.898	0.623	1.09675e-199
Trachea/ventral foregut	Rasl11b	1.32197e-189	0.48891	0.828	0.591	2.10206e-185
Trachea/ventral foregut	Mecom	1.44911e-168	0.396404	0.929	0.715	2.30422e-164
Trachea/ventral foregut	Irx5	3.83558e-167	0.357059	0.737	0.439	6.09895e-163
Trachea/ventral foregut	Igfbp2	4.03004e-126	0.393771	0.997	0.987	6.40817e-122
Trachea/ventral foregut	Map1b	1.68746e-85	0.370709	0.845	0.732	2.68323e-81
Pharynx	Dcn	0	1.70244	0.973	0.389	0
Pharynx	Meis2	0	0.926091	0.961	0.576	0
Pharynx	Hadh	0	0.826602	0.993	0.916	0
Pharynx	Sfrp1	0	0.731322	0.764	0.244	0
Pharynx	Foxe1	0	0.611772	0.64	0.107	0
Pharynx	Trp63	0	0.539961	0.656	0.13	0
Pharynx	Perp	2.87156e-301	0.664602	0.787	0.328	4.56607e-297
Pharynx	Sfn	6.69604e-300	0.621283	0.661	0.195	1.06474e-295
Pharynx	Emb	1.45592e-269	0.700898	0.979	0.84	2.31506e-265
Pharynx	Siva1	1.73641e-250	0.550353	0.995	0.973	2.76106e-246
Pharynx	Shisa2	2.59647e-243	0.495565	0.729	0.281	4.12865e-239
Pharynx	Sox2	2.01199e-231	0.552385	0.922	0.499	3.19927e-227
Pharynx	Ifitm3	2.46037e-226	0.614334	0.813	0.45	3.91223e-222
Pharynx	4631405K08Rik	4.04721e-226	0.540643	0.821	0.417	6.43548e-222
Pharynx	Fxyd3	2.32607e-225	0.5346	0.654	0.239	3.69868e-221
Pharynx	Hspb1	1.82557e-213	0.734634	0.733	0.372	2.90284e-209
Pharynx	Csrp2	3.74251e-197	0.555136	0.959	0.855	5.95097e-193
Pharynx	Isl1	7.86128e-193	0.548571	0.906	0.679	1.25002e-188
Pharynx	Krt19	8.95581e-179	0.570121	0.789	0.445	1.42406e-174
Pharynx	Bcam	6.03478e-169	0.497233	0.956	0.819	9.5959e-165
Esophagus/dorsal foregut	Pitx1	0	1.08403	0.784	0.107	0
Esophagus/dorsal foregut	Serpina1a	7.08493e-291	0.717345	0.499	0.063	1.12658e-286
Esophagus/dorsal foregut	Vtn	1.79834e-222	0.713793	0.886	0.382	2.85954e-218
Esophagus/dorsal foregut	Ntn1	4.73367e-205	0.350998	0.515	0.104	7.52702e-201
Esophagus/dorsal foregut	Sox2	7.59166e-199	0.671744	0.967	0.534	1.20715e-194
Esophagus/dorsal foregut	Igfbp2	4.44314e-179	0.726457	1	0.989	7.06503e-175
Esophagus/dorsal foregut	Ifitm1	3.06463e-173	0.62135	0.906	0.537	4.87307e-169
Esophagus/dorsal foregut	Rbp1	4.61158e-144	0.557094	0.988	0.944	7.33287e-140
Esophagus/dorsal foregut	Krt7	2.42481e-117	0.449374	0.995	0.856	3.8557e-113
Esophagus/dorsal foregut	Gsto1	1.32097e-111	0.405325	0.804	0.478	2.10047e-107
Esophagus/dorsal foregut	Klf5	9.44059e-109	0.432566	0.716	0.367	1.50115e-104
Esophagus/dorsal foregut	Bcl11a	2.73902e-103	0.367797	0.698	0.347	4.35532e-99
Esophagus/dorsal foregut	Hoxc4	3.65136e-103	0.388115	0.791	0.454	5.80603e-99
Esophagus/dorsal foregut	Wfdc2	4.05615e-84	0.443433	0.996	0.948	6.44969e-80
Esophagus/dorsal foregut	Krt19	1.32753e-82	0.347332	0.792	0.478	2.1109e-78
Esophagus/dorsal foregut	Krt8	6.86154e-76	0.351471	0.993	0.962	1.09105e-71
Esophagus/dorsal foregut	Krt18	2.13342e-65	0.352237	0.999	0.982	3.39234e-61
Esophagus/dorsal foregut	Mt1	7.79532e-61	0.502007	0.785	0.551	1.23953e-56
Esophagus/dorsal foregut	Arl4a	2.03917e-56	0.341518	0.527	0.29	3.24248e-52
Esophagus/dorsal foregut	Mt2	4.53894e-37	0.446678	0.568	0.379	7.21736e-33
Ultimobranchial body	Aldh1a1	0	1.98628	0.806	0.12	0
Ultimobranchial body	Crabp1	0	1.08984	0.723	0.069	0
Ultimobranchial body	Pax9	0	1.0379	0.864	0.104	0
Ultimobranchial body	Mfap4	0	0.98583	0.886	0.175	0
Ultimobranchial body	Col1a2	0	0.806697	0.636	0.05	0
Ultimobranchial body	Hoxb1	1.94676e-304	1.23408	0.842	0.158	3.09555e-300
Ultimobranchial body	Edn1	8.45595e-284	0.926321	0.672	0.094	1.34458e-279
Ultimobranchial body	Mest	2.44112e-240	1.6134	0.995	0.514	3.88163e-236
Ultimobranchial body	Nkx2-5	9.94844e-191	0.802098	0.653	0.135	1.5819e-186
Ultimobranchial body	Meis2	5.89428e-183	1.06184	0.995	0.63	9.37249e-179
Ultimobranchial body	Mpped2	8.06711e-173	0.84757	0.905	0.434	1.28275e-168
Ultimobranchial body	Crabp2	8.96451e-173	0.995733	0.995	0.878	1.42545e-168
Ultimobranchial body	Gpx3	1.46936e-168	0.984709	0.932	0.47	2.33644e-164
Ultimobranchial body	Tmsb4x	1.20834e-165	1.02071	1	0.998	1.92138e-161
Ultimobranchial body	Sh3glb1	1.19409e-151	0.865725	0.978	0.75	1.89872e-147
Ultimobranchial body	Shisa2	1.63236e-143	0.803119	0.845	0.338	2.59562e-139
Ultimobranchial body	Igfbp5	1.60273e-138	1.0527	0.998	0.868	2.54851e-134
Ultimobranchial body	Ripply3	1.69009e-131	0.894481	0.726	0.269	2.6874e-127
Ultimobranchial body	Hoxb4	5.1845e-116	0.889135	0.794	0.404	8.24387e-112
Ultimobranchial body	Arg1	3.03907e-74	0.7693	0.852	0.62	4.83242e-70

## Sheet: E11.5scRNA-seq_top20
Source Data 1. Relates to Figure 1, S1-4
E11.5 Top 20 markers of each cell cluster identified by RNAseq Seurat V3, FindAllMarkers, only.pos=T, min.pct=0.25, logfc.threshold=0.25
cluster	gene	p_val	avg_logFC	pct.1	pct.2	p_val_adj
Lung	Cdkn1c	0	0.513167	1	0.999	0
Lung	Ccnd1	0	0.455957	0.997	0.95	0
Lung	Npc2	0	0.317831	1	0.998	0
Lung	Tuba1a	1.06829e-262	0.296998	1	0.997	1.7162e-258
Lung	Tgfb2	6.20414e-250	0.401128	0.941	0.751	9.96694e-246
Lung	Nnat	1.03882e-211	0.280247	0.995	0.968	1.66886e-207
Lung	Galk1	8.0323e-209	0.272448	0.996	0.981	1.29039e-204
Lung	Sparc	2.16541e-199	0.283239	0.999	0.986	3.47874e-195
Lung	Cldn18	6.3004e-192	0.309299	0.821	0.536	1.01216e-187
Lung	Sesn3	2.4752e-189	0.298564	0.893	0.771	3.97641e-185
Lung	Irx1	5.0834e-189	0.2871	0.878	0.66	8.16648e-185
Lung	Btg2	1.88862e-184	0.316417	0.843	0.664	3.03406e-180
Lung	Ly6h	1.2849e-178	0.289743	0.949	0.767	2.0642e-174
Lung	Krt18	1.52719e-171	0.265311	0.99	0.978	2.45344e-167
Lung	Tmsb4x	8.64984e-171	0.285615	1	0.999	1.3896e-166
Lung	Sftpc	2.05005e-146	0.476307	0.65	0.363	3.2934e-142
Lung	Thbs1	1.14346e-144	0.256366	0.779	0.56	1.83698e-140
Lung	Smoc2	4.8227e-139	0.285383	0.664	0.447	7.74767e-135
Lung	Ckb	1.43694e-124	0.268669	0.91	0.791	2.30845e-120
Lung	Etv5	2.13779e-115	0.25733	0.809	0.58	3.43435e-111
Lung (prolif.)	Hist1h1b	0	0.710362	0.936	0.502	0
Lung (prolif.)	Sftpc	0	0.704333	0.778	0.333	0
Lung (prolif.)	Hist1h1e	0	0.649662	0.953	0.635	0
Lung (prolif.)	Hist1h2ap	0	0.641043	0.995	0.904	0
Lung (prolif.)	2810417H13Rik	0	0.608684	0.999	0.878	0
Lung (prolif.)	Top2a	0	0.595742	0.979	0.668	0
Lung (prolif.)	Cdk1	0	0.440838	0.955	0.636	0
Lung (prolif.)	Tyms	0	0.392171	0.989	0.866	0
Lung (prolif.)	Tubb5	0	0.328949	1	1	0
Lung (prolif.)	Foxp2	8.94231e-286	0.424813	0.964	0.78	1.43658e-281
Lung (prolif.)	Fbxo5	5.69195e-284	0.337906	0.875	0.518	9.14412e-280
Lung (prolif.)	Etv5	3.09e-268	0.417266	0.915	0.555	4.96408e-264
Lung (prolif.)	Mia	9.93385e-240	0.3263	0.862	0.48	1.59587e-235
Lung (prolif.)	Spc24	7.99082e-230	0.328517	0.972	0.78	1.28372e-225
Lung (prolif.)	Nkx2-1	2.63906e-225	0.333843	0.992	0.832	4.23964e-221
Lung (prolif.)	Hmgb2	9.33993e-202	0.341907	1	0.987	1.50046e-197
Lung (prolif.)	Ube2c	5.53635e-198	0.398327	0.915	0.667	8.89414e-194
Lung (prolif.)	Sox9	2.49827e-173	0.331624	0.877	0.629	4.01347e-169
Lung (prolif.)	Rrm2	9.58966e-162	0.354129	0.964	0.783	1.54058e-157
Lung (prolif.)	Hbb-y	5.43271e-09	0.467717	0.21	0.259	8.72766e-05
Pharynx	Hspb1	0	1.58217	0.924	0.18	0
Pharynx	Dcn	0	1.23154	0.898	0.12	0
Pharynx	Sfn	0	1.1622	0.968	0.183	0
Pharynx	Perp	0	0.931033	0.954	0.229	0
Pharynx	Fxyd3	0	0.923131	0.957	0.17	0
Pharynx	Ifitm3	0	0.91732	0.899	0.292	0
Pharynx	Anxa8	0	0.863356	0.88	0.073	0
Pharynx	Anxa2	0	0.832837	0.999	0.722	0
Pharynx	Krt15	0	0.827406	0.672	0.113	0
Pharynx	Siva1	0	0.801708	1	0.99	0
Pharynx	Meis2	0	0.792411	0.927	0.375	0
Pharynx	4631405K08Rik	0	0.784886	0.944	0.299	0
Pharynx	Klf5	0	0.740514	0.918	0.375	0
Pharynx	Id1	0	0.72803	0.947	0.552	0
Pharynx	Bcam	0	0.711818	0.986	0.789	0
Pharynx	Pdgfa	0	0.680427	0.985	0.747	0
Pharynx	Upk3bl	0	0.642871	0.845	0.103	0
Pharynx	S100a10	0	0.634764	0.959	0.62	0
Pharynx	Sox2	0	0.613953	0.96	0.496	0
Pharynx	Wfdc2	5.82284e-308	0.60915	0.998	0.975	9.35439e-304
Trachea	Rps28	0	0.429996	1	1	0
Trachea	Nr2f2	2.73349e-296	0.5427	0.992	0.884	4.39135e-292
Trachea	Hadh	8.56493e-276	0.537805	0.987	0.923	1.37596e-271
Trachea	Nrp2	9.85016e-270	0.376948	0.679	0.261	1.58243e-265
Trachea	Ccnd2	1.06206e-259	0.55617	1	0.976	1.70621e-255
Trachea	6330403K07Rik	3.38228e-248	0.463146	0.975	0.881	5.43364e-244
Trachea	Lrrn3	1.27982e-243	0.374377	0.649	0.254	2.05602e-239
Trachea	Ptn	1.72731e-242	0.555216	0.991	0.845	2.77492e-238
Trachea	Pcdh10	2.56643e-233	0.471024	0.794	0.426	4.12298e-229
Trachea	Map1b	1.59634e-232	0.59607	0.91	0.704	2.56452e-228
Trachea	Mecom	1.94713e-231	0.467253	0.98	0.9	3.12806e-227
Trachea	Golim4	7.1962e-230	0.516813	0.949	0.77	1.15607e-225
Trachea	Ddit4	1.32703e-220	0.490543	0.917	0.675	2.13187e-216
Trachea	Anxa2	1.73361e-205	0.431	0.985	0.736	2.78504e-201
Trachea	Igfbp5	7.29084e-204	0.550224	0.995	0.909	1.17127e-199
Trachea	Rps27rt	2.88182e-202	0.372484	0.985	0.916	4.62964e-198
Trachea	Id3	5.61944e-201	0.4815	0.991	0.868	9.02764e-197
Trachea	Fstl1	1.11885e-182	0.401492	0.959	0.871	1.79744e-178
Trachea	Tppp3	2.71263e-147	0.459376	0.739	0.482	4.35784e-143
Trachea	Id1	4.60279e-115	0.373129	0.823	0.587	7.39438e-111
Lung (distal)	Dlk1	0	1.72806	0.994	0.464	0
Lung (distal)	Bex4	0	1.12989	1	0.981	0
Lung (distal)	Apoe	0	1.10049	0.671	0.21	0
Lung (distal)	Bmp4	0	1.01948	0.78	0.294	0
Lung (distal)	Clu	0	0.847802	0.809	0.236	0
Lung (distal)	Bex1	0	0.614823	1	0.993	0
Lung (distal)	Slc2a3	0	0.587997	0.722	0.197	0
Lung (distal)	Atox1	0	0.511992	1	0.994	0
Lung (distal)	Bex2	5.08375e-302	0.809232	0.986	0.803	8.16705e-298
Lung (distal)	Actr3	6.61838e-301	0.570632	0.992	0.922	1.06324e-296
Lung (distal)	Lin7a	3.59899e-275	0.525358	0.92	0.421	5.78178e-271
Lung (distal)	Vim	4.41553e-268	0.605584	0.969	0.652	7.09355e-264
Lung (distal)	Selm	2.06599e-262	0.558478	0.856	0.481	3.31901e-258
Lung (distal)	Id2	7.08297e-246	0.922009	0.968	0.856	1.13788e-241
Lung (distal)	Hspa5	4.1884e-231	0.517619	0.999	0.996	6.72867e-227
Lung (distal)	Crlf1	5.94613e-231	0.509639	0.999	0.796	9.55245e-227
Lung (distal)	Etv5	4.28809e-187	0.513143	0.964	0.609	6.88882e-183
Lung (distal)	Meg3	3.20651e-183	0.712359	0.97	0.772	5.15126e-179
Lung (distal)	Peg3	1.50531e-179	0.583893	0.975	0.889	2.41828e-175
Lung (distal)	Sox9	6.37122e-170	0.520181	0.947	0.663	1.02354e-165
Esophagus	Pitx1	0	1.79076	1	0.117	0
Esophagus	Dcn	0	1.53549	0.988	0.21	0
Esophagus	Fxyd3	0	0.967386	0.986	0.265	0
Esophagus	Anxa1	0	0.868462	0.842	0.182	0
Esophagus	Fam43b	0	0.727548	0.787	0.054	0
Esophagus	Klf4	3.71342e-296	0.717868	0.911	0.292	5.96561e-292
Esophagus	Igfbp2	4.52017e-288	1.15983	1	0.998	7.26165e-284
Esophagus	Ifitm1	7.7683e-288	0.853607	0.917	0.278	1.24798e-283
Esophagus	Igfbp4	2.33077e-276	1.20521	0.994	0.677	3.74438e-272
Esophagus	4631405K08Rik	1.30074e-273	0.945627	0.968	0.376	2.08965e-269
Esophagus	Sfn	2.1442e-259	0.792504	0.943	0.279	3.44466e-255
Esophagus	Ifitm3	5.18163e-255	1.06293	0.955	0.363	8.32429e-251
Esophagus	Ctnnb1	2.1227e-249	0.784494	1	0.972	3.41011e-245
Esophagus	Krt15	2.27527e-219	0.735174	0.73	0.178	3.65522e-215
Esophagus	Uqcr10	6.3788e-217	0.617495	1	0.989	1.02475e-212
Esophagus	Fam210b	1.23063e-215	0.680796	0.959	0.509	1.97701e-211
Esophagus	Perp	1.73097e-210	0.600638	0.919	0.319	2.78081e-206
Esophagus	Isyna1	1.89434e-192	0.733956	0.992	0.949	3.04326e-188
Esophagus	Sox2	2.03804e-178	0.739679	0.986	0.551	3.27411e-174
Esophagus	Igfbp5	1.00489e-135	0.676882	1	0.916	1.61436e-131
Trachea (prolif.)	Hist1h2ap	6.39388e-216	1.2519	1	0.923	1.02718e-211
Trachea (prolif.)	Pcdh10	2.07949e-145	0.547977	0.909	0.45	3.3407e-141
Trachea (prolif.)	Nr2f2	1.91472e-137	0.587368	1	0.892	3.07601e-133
Trachea (prolif.)	Top2a	3.50246e-137	0.755634	0.994	0.731	5.6267e-133
Trachea (prolif.)	Hist1h2ae	3.55456e-133	0.706507	0.919	0.53	5.7104e-129
Trachea (prolif.)	Ptn	3.25783e-129	0.617948	0.998	0.856	5.2337e-125
Trachea (prolif.)	Malat1	2.00954e-113	0.444749	1	1	3.22833e-109
Trachea (prolif.)	Hist1h1b	4.43903e-111	0.540016	0.98	0.589	7.1313e-107
Trachea (prolif.)	Hadh	2.77683e-101	0.455834	0.994	0.928	4.46097e-97
Trachea (prolif.)	Mki67	8.53098e-89	0.528506	0.921	0.612	1.3705e-84
Trachea (prolif.)	Id1	2.13163e-88	0.539196	0.915	0.602	3.42446e-84
Trachea (prolif.)	Mecom	7.50677e-85	0.389217	0.992	0.906	1.20596e-80
Trachea (prolif.)	Hist1h1e	2.90711e-80	0.430211	0.961	0.7	4.67027e-76
Trachea (prolif.)	Incenp	1.57256e-77	0.383506	0.911	0.56	2.52632e-73
Trachea (prolif.)	Smc4	9.27445e-74	0.401545	0.994	0.825	1.48994e-69
Trachea (prolif.)	Sox2	1.45334e-73	0.380505	0.939	0.554	2.33479e-69
Trachea (prolif.)	Nusap1	7.96557e-72	0.42645	0.839	0.475	1.27967e-67
Trachea (prolif.)	Golim4	2.37473e-68	0.434272	0.947	0.785	3.815e-64
Trachea (prolif.)	Cenpf	1.24989e-58	0.400285	0.943	0.648	2.00795e-54
Trachea (prolif.)	Xist	4.79294e-13	0.503569	0.646	0.625	7.69987e-09
