# Supplementary material for: Delineating the early transcriptional specification of the mammalian trachea and esophagus
Source: eLife. 2020 Jun 9;9:e55526. doi: 10.7554/eLife.55526 (PMC7282815; doi:10.7554/eLife.55526)
Supplement: Figure 2—source data 1. [file elife-55526-fig2-data1.xlsx]

## Sheet: DEGenes Nkx2.1 mutant vs WT
Source Data 2, relates to Figure 2
Differentially expressed genes (DESeq2) Nkx2.1-/- mutant v.s. WT foregut Thresholds: |log2FoldChange| > 0.7, padj < 0.05 baseMean: mean of normalized counts for all samples log2FoldChange: log2 fold change lfcSE: standard error stat: Wald statistic pvalue: Wald test p-value padj: BH adjusted p-values
Decreased in Nkx2.1-/- mutant vs WT, significant
Increased in Nkx2.1-/- mutant vs WT, significant
GeneName	baseMean	log2FoldChange	lfcSE	stat	pvalue	padj
Anxa8	1473.57	0.701409	0.141843	4.94497	7.61546e-07	4.7198e-05
Pcyt1b	422.041	0.708533	0.184608	3.83803	0.000124023	0.00376375
Wdr72	42.2086	0.708565	0.176047	4.02487	5.70077e-05	0.0019446
Dach2	512.604	0.708739	0.17486	4.05317	5.05286e-05	0.0017693
Sema3e	3728.12	0.711038	0.0996533	7.13511	9.67081e-13	1.70219e-10
Msx2	172.709	0.711105	0.204691	3.47404	0.000512682	0.0117092
Serping1	179.991	0.715573	0.201836	3.54533	0.000392125	0.00973016
Plcd1	538.161	0.716462	0.181045	3.95736	7.57819e-05	0.00246403
Tgm2	1099.48	0.716474	0.163621	4.37887	1.19298e-05	0.000526198
8430427H17Rik	2504.47	0.718782	0.103935	6.91569	4.65597e-12	7.06476e-10
Gramd1b	352.162	0.720494	0.178769	4.03031	5.57034e-05	0.00190503
Fam181b	205.014	0.720907	0.199813	3.60791	0.000308679	0.00801656
Pex5l	131.317	0.724179	0.204693	3.53788	0.000403354	0.00991559
Palm3	1065.86	0.731748	0.168867	4.33328	1.46904e-05	0.000635831
Macc1	662.814	0.731988	0.15003	4.87895	1.06655e-06	6.3708e-05
Shh	9711.13	0.732159	0.0624903	11.7164	1.05092e-31	1.06717e-28
Btbd11	522.542	0.732744	0.177384	4.13083	3.61453e-05	0.00132543
Psap	3879.43	0.73597	0.0837383	8.78893	1.5099e-18	5.53673e-16
Parm1	480.21	0.736429	0.162862	4.52179	6.13201e-06	0.000292233
Bex2	1219.06	0.740162	0.134156	5.51718	3.44478e-08	2.97219e-06
Epb4.1l4b	508.174	0.741845	0.174264	4.25703	2.07163e-05	0.000857289
Anxa1	802.137	0.748048	0.177581	4.21244	2.52625e-05	0.00101192
Nceh1	215.89	0.751219	0.202168	3.71582	0.00020255	0.00567698
Sptlc3	275.028	0.753351	0.202667	3.71719	0.000201447	0.0056581
Syne1	1641.66	0.753944	0.131151	5.74865	8.99565e-09	8.668e-07
Ghr	1740.4	0.754706	0.112607	6.70212	2.05421e-11	2.87474e-09
Rbms1	2973.56	0.76006	0.0915797	8.29944	1.04605e-16	3.06863e-14
Rin2	2006.05	0.761228	0.125115	6.08423	1.17051e-09	1.29848e-07
Pof1b	120.798	0.766316	0.200353	3.82482	0.000130866	0.00391833
Lypd6b	765.072	0.769333	0.155754	4.93941	7.83595e-07	4.789e-05
Zfhx3	13670.5	0.772765	0.0726372	10.6387	1.96872e-26	1.73261e-23
Kcns1	141.179	0.773406	0.201659	3.83522	0.00012545	0.00378962
Sh3bp5	384.35	0.774041	0.18647	4.15102	3.31001e-05	0.00123434
Pvrl4	296.494	0.778006	0.186636	4.16858	3.06507e-05	0.00116605
Tnfrsf19	2810.04	0.779389	0.096104	8.10985	5.06833e-16	1.28667e-13
Nell1	357.799	0.780487	0.204862	3.80982	0.000139067	0.00412546
Fzd6	1474.32	0.780564	0.112221	6.9556	3.51066e-12	5.38887e-10
Filip1l	1138.04	0.781276	0.132257	5.90725	3.47856e-09	3.53234e-07
Unc13d	109.824	0.781782	0.193883	4.03224	5.52471e-05	0.00189433
Grb14	290.79	0.788631	0.199279	3.95742	7.57626e-05	0.00246403
Myof	1674.31	0.792109	0.148373	5.33863	9.36494e-08	7.58445e-06
Fbxo32	744.349	0.799615	0.1552	5.15215	2.5751e-07	1.75226e-05
1110032F04Rik	159.387	0.799622	0.20307	3.93766	8.22791e-05	0.00264547
Abhd2	2333.82	0.802123	0.132819	6.03921	1.54869e-09	1.64873e-07
Clmn	1167.14	0.805738	0.139825	5.76249	8.28833e-09	8.10476e-07
Fry	1266.8	0.805872	0.144258	5.58632	2.31929e-08	2.06872e-06
D630039A03Rik	309.525	0.806824	0.204258	3.95003	7.81416e-05	0.00253451
Zim1	705.011	0.810367	0.158462	5.11394	3.15513e-07	2.1269e-05
Map3k13	327.702	0.815322	0.186769	4.3654	1.2689e-05	0.000556501
Nfe2l3	562.851	0.81924	0.156825	5.2239	1.7519e-07	1.25196e-05
Sgpp2	540.295	0.823717	0.17188	4.79239	1.64807e-06	9.37766e-05
Hyal1	1093.62	0.823832	0.132289	6.22753	4.73854e-10	5.58514e-08
Pi4k2b	469.252	0.828192	0.18123	4.56985	4.88081e-06	0.000242224
Sh3bgrl2	802.89	0.831642	0.156875	5.30131	1.14974e-07	8.98091e-06
Gsto1	511.653	0.8367	0.16915	4.9465	7.55607e-07	4.7198e-05
Phlda1	734.352	0.844036	0.183385	4.60253	4.17381e-06	0.000210299
Vps45	245.608	0.847966	0.196555	4.31415	1.60219e-05	0.000684481
Rgs6	196.659	0.855112	0.203044	4.21146	2.53727e-05	0.00101192
Efnb2	5878.33	0.86695	0.0839224	10.3304	5.13588e-25	4.23742e-22
Mitf	133.197	0.886966	0.203812	4.35188	1.34974e-05	0.000586116
Camk1d	700.296	0.891914	0.148697	5.99818	1.99542e-09	2.09059e-07
Pdlim7	1745.07	0.893632	0.118675	7.53006	5.07189e-14	1.1159e-11
Ahr	774.871	0.904446	0.158278	5.71428	1.10172e-08	1.02421e-06
Dclk1	415.124	0.908967	0.172391	5.27271	1.34421e-07	1.01399e-05
Alpl	2181	0.911754	0.12873	7.08267	1.41407e-12	2.36294e-10
Mgat4c	58.5847	0.915805	0.193246	4.73906	2.14707e-06	0.000117122
Inf2	577.032	0.925476	0.169626	5.45597	4.8707e-08	4.0695e-06
Atp7b	956.152	0.926072	0.156	5.93634	2.91446e-09	3.02944e-07
Mreg	182.638	0.92947	0.20399	4.55645	5.20258e-06	0.000253429
Ifitm3	331.612	0.935345	0.193211	4.84105	1.29155e-06	7.6115e-05
Gm8909	376.788	0.941019	0.185863	5.06297	4.12771e-07	2.69752e-05
Parvb	267.996	0.942372	0.203376	4.63365	3.5928e-06	0.000183122
Gata3	397.065	0.955055	0.199456	4.7883	1.68197e-06	9.5051e-05
S100a6	125.774	0.963702	0.202067	4.76921	1.84949e-06	0.000102312
Prickle2	2223.07	0.978977	0.118281	8.2767	1.26637e-16	3.63419e-14
Ptrf	472.024	1.00055	0.189587	5.27753	1.30938e-07	9.934e-06
Tshz2	865.87	1.00814	0.159735	6.31132	2.7666e-10	3.35063e-08
Dkk3	636.333	1.01597	0.156507	6.49156	8.49509e-11	1.12144e-08
Vtn	343.586	1.03345	0.203544	5.07725	3.82931e-07	2.51496e-05
Slc39a4	203.418	1.04319	0.200993	5.19017	2.10107e-07	1.4598e-05
Spock2	1493.77	1.05223	0.147201	7.14829	8.78676e-13	1.58896e-10
Gm16197	159.698	1.0713	0.205116	5.22292	1.76124e-07	1.25196e-05
Tspan12	913.639	1.08688	0.171275	6.34583	2.21234e-10	2.72944e-08
Has2	2566.2	1.10579	0.113575	9.73616	2.11392e-22	1.39529e-19
Ap1s3	682.325	1.10844	0.148823	7.44802	9.47497e-14	2.0174e-11
Fosl2	573.371	1.12045	0.184371	6.07715	1.22339e-09	1.34583e-07
Plxnc1	338.206	1.20889	0.186783	6.47216	9.66133e-11	1.25039e-08
9130014G24Rik	186.661	1.21058	0.200389	6.04113	1.53042e-09	1.64253e-07
Cyp2s1	673.393	1.21079	0.160311	7.5528	4.25995e-14	9.53145e-12
Pld6	205.407	1.21851	0.201296	6.05335	1.41867e-09	1.53507e-07
Abi3bp	2856.91	1.26949	0.194563	6.52485	6.80701e-11	9.26385e-09
Mtap6	232.488	1.27598	0.20048	6.36463	1.95761e-10	2.43797e-08
Sp5	1229.21	1.28373	0.148086	8.66881	4.36668e-18	1.51696e-15
Adamtsl5	183.72	1.31743	0.201785	6.52891	6.62507e-11	9.11016e-09
Arap2	514.669	1.35677	0.189161	7.17259	7.35921e-13	1.36829e-10
Kcnd2	120.297	1.35881	0.202774	6.70108	2.06878e-11	2.87474e-09
Dnahc5	198.089	1.38824	0.204388	6.79217	1.1046e-11	1.60239e-09
Slc40a1	517.599	1.3945	0.176663	7.89356	2.93691e-15	7.04912e-13
Klf5	3557.28	1.40809	0.099203	14.194	9.97294e-46	2.19421e-42
Ryr3	448.593	1.41777	0.203702	6.96004	3.4017e-12	5.34593e-10
Ednra	896.696	1.46139	0.135061	10.8202	2.76045e-27	2.60291e-24
Ccdc85a	192.069	1.48217	0.203263	7.29189	3.05645e-13	6.11337e-11
Slc2a3	1117.33	1.49834	0.177169	8.45714	2.74025e-17	8.61287e-15
Lgr5	1776.9	1.55746	0.12594	12.3667	3.95675e-35	4.74846e-32
Rbp4	181.676	1.78039	0.202776	8.78008	1.63357e-18	5.82832e-16
Cdkn1a	835.705	2.02628	0.151055	13.4141	4.99652e-41	7.32878e-38
Lmo2	332.95	2.08123	0.202134	10.2963	7.32236e-25	5.68603e-22
Sp8	492.151	2.50595	0.171351	14.6247	1.95563e-48	5.16326e-45
Wnt6	384.676	2.55722	0.189831	13.471	2.31618e-41	4.36798e-38
Crlf1	724.101	-3.40194	0.183285	-18.5609	6.65984e-77	8.79166e-73
Hhip	444.75	-2.44413	0.189437	-12.9021	4.38101e-38	5.78337e-35
Msn	1527.99	-2.12083	0.142041	-14.9311	2.06901e-50	6.82825e-47
Nkx2-1	2525.35	-2.05476	0.130362	-15.7619	5.68749e-56	2.50269e-52
Mical2	1373.67	-1.83997	0.13685	-13.4451	3.28777e-41	5.42524e-38
Col4a6	809.989	-1.82172	0.148086	-12.3017	8.86495e-35	9.75218e-32
Ror1	385.7	-1.81875	0.200393	-9.07592	1.12722e-19	5.21683e-17
Rspo1	161.344	-1.81083	0.20458	-8.85143	8.6402e-19	3.25884e-16
Wnt7b	5038.04	-1.80768	0.100936	-17.9092	9.98973e-72	6.59372e-68
Lrrn3	630.232	-1.7891	0.195177	-9.16657	4.8833e-20	2.57858e-17
Pcdh10	2089.7	-1.76663	0.199433	-8.85824	8.12902e-19	3.15621e-16
Etv5	1994.61	-1.74886	0.205115	-8.52626	1.51149e-17	4.9883e-15
Ptprt	257.406	-1.69121	0.204587	-8.26646	1.37997e-16	3.87594e-14
Wnt11	122.239	-1.67753	0.20471	-8.19466	2.51308e-16	6.77044e-14
Ptgis	178.295	-1.66669	0.204193	-8.16234	3.28595e-16	8.67558e-14
Tmem132d	117.478	-1.59556	0.202545	-7.87754	3.33888e-15	7.87082e-13
A930038C07Rik	357.545	-1.58716	0.19451	-8.15982	3.35516e-16	8.68461e-14
Atp8a1	1119.76	-1.48692	0.161877	-9.18549	4.09665e-20	2.25333e-17
Cdh8	132.966	-1.48579	0.205111	-7.24383	4.362e-13	8.46805e-11
Slc24a3	107.033	-1.45385	0.20441	-7.11243	1.14019e-12	1.98048e-10
Fbn2	10648	-1.44827	0.159376	-9.08708	1.01737e-19	4.9742e-17
Rem2	404.35	-1.42008	0.196367	-7.23175	4.76823e-13	9.12252e-11
Itga9	713.466	-1.39324	0.168972	-8.24537	1.64651e-16	4.52825e-14
Gpr126	437.564	-1.36131	0.191643	-7.10338	1.21741e-12	2.08715e-10
Leprel1	236.508	-1.32986	0.204911	-6.48995	8.58632e-11	1.12226e-08
Npc1	1779.19	-1.3062	0.131275	-9.95014	2.51824e-23	1.74965e-20
Abcc6	111.762	-1.28064	0.202237	-6.33239	2.41397e-10	2.95063e-08
Mtus2	1116.73	-1.26449	0.138129	-9.15444	5.46419e-20	2.77434e-17
Tecrl	123.814	-1.26306	0.205109	-6.15801	7.3666e-10	8.31167e-08
Adcy7	336.714	-1.2137	0.200487	-6.05375	1.41513e-09	1.53507e-07
Adamts3	196.004	-1.20374	0.20499	-5.8722	4.30057e-09	4.30089e-07
Dll4	175.959	-1.20348	0.204532	-5.88408	4.00281e-09	4.03367e-07
Eps8	796.178	-1.20162	0.172719	-6.95711	3.47328e-12	5.38887e-10
Epha4	831.735	-1.18926	0.169035	-7.0356	1.98409e-12	3.21657e-10
Sh3rf3	141.66	-1.1822	0.200078	-5.90868	3.44861e-09	3.52908e-07
Ets1	246.906	-1.1777	0.2051	-5.74207	9.35243e-09	8.94648e-07
Ccno	95.0585	-1.17619	0.19076	-6.16579	7.01325e-10	7.98119e-08
Dclk2	553.223	-1.17435	0.170403	-6.89164	5.51526e-12	8.27352e-10
Fmod	1165.09	-1.16286	0.130536	-8.90833	5.18083e-19	2.13725e-16
Scn5a	636.181	-1.16035	0.177995	-6.51903	7.07636e-11	9.53215e-09
Tle2	849.539	-1.14752	0.150687	-7.61529	2.63104e-14	5.98835e-12
Thbs3	715.74	-1.10025	0.162444	-6.77312	1.26032e-11	1.80842e-09
Epha7	1514.94	-1.09487	0.129179	-8.47556	2.3396e-17	7.53296e-15
Syt7	856.117	-1.07587	0.150561	-7.14577	8.94921e-13	1.59647e-10
Fam176a	167.667	-1.07527	0.205038	-5.24424	1.56927e-07	1.15088e-05
Rtkn2	837.297	-1.06525	0.163726	-6.50631	7.70214e-11	1.02703e-08
Tmem108	191.195	-1.06113	0.201482	-5.26663	1.38949e-07	1.03631e-05
Tppp3	355.423	-1.05016	0.201568	-5.20995	1.88896e-07	1.32639e-05
Edn3	632.157	-1.02856	0.150505	-6.83409	8.25257e-12	1.21047e-09
Osr2	141.957	-1.02179	0.205088	-4.98222	6.28592e-07	4.00872e-05
Col22a1	271.026	-1.00805	0.189839	-5.31004	1.09603e-07	8.61229e-06
St6gal1	1647.21	-1.00531	0.116905	-8.59934	8.01748e-18	2.71381e-15
Col25a1	173.036	-1.00451	0.204626	-4.90901	9.15365e-07	5.51769e-05
Tns1	1122.47	-1.00264	0.156854	-6.3922	1.63512e-10	2.05573e-08
Tgfb2	3068.88	-0.996926	0.198086	-5.03279	4.83396e-07	3.1281e-05
Muc1	482.431	-0.994255	0.195758	-5.07901	3.79407e-07	2.50427e-05
Ptprm	990.994	-0.974464	0.142496	-6.83855	7.99981e-12	1.18658e-09
Dgkk	214.225	-0.973559	0.204085	-4.77037	1.83889e-06	0.000102312
Thsd4	721.346	-0.965484	0.150318	-6.42294	1.33666e-10	1.71313e-08
Creb5	196.351	-0.961921	0.202865	-4.74167	2.11959e-06	0.000116103
Maf	154.981	-0.960129	0.204489	-4.69525	2.66275e-06	0.000141738
Col4a5	2492.24	-0.957293	0.10607	-9.02507	1.79575e-19	7.90189e-17
Dnajb4	872.531	-0.957034	0.141497	-6.76365	1.34562e-11	1.91006e-09
Irx1	3385.8	-0.956505	0.113774	-8.40704	4.20491e-17	1.29091e-14
Iqgap2	1024.46	-0.944595	0.164134	-5.75501	8.66363e-09	8.40946e-07
Pkhd1	289.561	-0.935593	0.199865	-4.68114	2.85289e-06	0.000149448
Ankrd33b	148.811	-0.932098	0.204899	-4.54906	5.3885e-06	0.000260563
Gpr85	110.377	-0.926593	0.203095	-4.56236	5.05814e-06	0.000249151
Rai14	8965.86	-0.920256	0.0976728	-9.42183	4.43277e-21	2.65986e-18
Islr	331.336	-0.918631	0.19143	-4.79879	1.59627e-06	9.12225e-05
Pgf	108.773	-0.914072	0.203707	-4.48718	7.21715e-06	0.000339052
Tub	533.299	-0.910739	0.164447	-5.53818	3.05635e-08	2.67198e-06
Sparc	3963.38	-0.90504	0.114523	-7.90272	2.72877e-15	6.67083e-13
Sema4f	233.613	-0.897817	0.204954	-4.38058	1.18362e-05	0.000524329
Gldn	58.4268	-0.897428	0.181628	-4.94102	7.77166e-07	4.7718e-05
Samd9l	330.278	-0.896217	0.187215	-4.7871	1.69207e-06	9.5051e-05
Lepr	156.023	-0.893053	0.204984	-4.3567	1.32037e-05	0.000577159
Add3	8724.84	-0.889808	0.0915377	-9.72068	2.46141e-22	1.54729e-19
Fndc3c1	831.787	-0.889637	0.170217	-5.2265	1.72753e-07	1.24618e-05
Snora23	250.562	-0.886693	0.194645	-4.55545	5.22739e-06	0.000253701
Lpl	269.948	-0.878572	0.198382	-4.42868	9.48126e-06	0.00043011
Gprin3	122.935	-0.860867	0.195295	-4.40803	1.04313e-05	0.000471587
Kcnb2	152.539	-0.860233	0.203769	-4.22161	2.42561e-05	0.000982222
Smad9	466.514	-0.860095	0.183615	-4.68422	2.81023e-06	0.0001478
Rmrp	21886.1	-0.860022	0.175849	-4.89068	1.00488e-06	6.02974e-05
Pcdh18	1153.32	-0.849856	0.13872	-6.12641	8.98855e-10	1.00557e-07
Fbln5	220.352	-0.848429	0.204014	-4.15867	3.20104e-05	0.00120048
Ntf3	86.8583	-0.838525	0.202715	-4.13647	3.52693e-05	0.00130053
Elfn1	114.794	-0.829664	0.19826	-4.18473	2.855e-05	0.00110201
Fbln7	85.9114	-0.827018	0.194668	-4.24835	2.15353e-05	0.000882881
Foxp2	3595.9	-0.826029	0.0910313	-9.07412	1.14603e-19	5.21683e-17
Socs2	276.816	-0.820394	0.203157	-4.03823	5.38565e-05	0.00186115
Bik	53.4272	-0.817993	0.185702	-4.40486	1.0585e-05	0.000476905
2019-09-10	627.627	-0.817626	0.17078	-4.78761	1.68781e-06	9.5051e-05
Efna1	1066.11	-0.809811	0.153963	-5.25978	1.44225e-07	1.06364e-05
Bmp5	108.812	-0.808798	0.185725	-4.35482	1.33179e-05	0.000580229
Hivep2	1211.28	-0.806666	0.140994	-5.72129	1.0572e-08	9.89795e-07
Fads3	97.8327	-0.803643	0.193047	-4.16293	3.14194e-05	0.00118844
Gprc5a	504.989	-0.799605	0.193357	-4.13539	3.54358e-05	0.00130303
Entpd3	641.324	-0.799299	0.178901	-4.46783	7.90162e-06	0.000365997
Dpp4	279.639	-0.797112	0.198759	-4.01044	6.0605e-05	0.0020514
Snora21	309.841	-0.795126	0.191162	-4.15943	3.19036e-05	0.00119988
B3gnt7	395.972	-0.792445	0.189588	-4.17982	2.91737e-05	0.00111642
Col4a4	85.6212	-0.792404	0.194539	-4.07324	4.63638e-05	0.00164951
Heg1	311.623	-0.790785	0.184468	-4.28684	1.81233e-05	0.000757107
Palm2	440.624	-0.786587	0.179654	-4.37835	1.19581e-05	0.000526198
Ces1d	577.459	-0.784114	0.178543	-4.39175	1.12444e-05	0.00050318
Zeb2	350.236	-0.782194	0.181959	-4.29874	1.71771e-05	0.000724458
Slitrk5	176.024	-0.779121	0.205086	-3.799	0.000145281	0.0042714
Nhsl2	1919.07	-0.778262	0.125041	-6.22405	4.8448e-10	5.65984e-08
Mtap1a	425.133	-0.776529	0.191118	-4.0631	4.84263e-05	0.00171387
Cntn2	116.707	-0.773008	0.200422	-3.85691	0.000114829	0.00350891
Col5a2	348.245	-0.771886	0.196858	-3.92102	8.81744e-05	0.00279805
Micalcl	61.7601	-0.7711	0.194249	-3.96965	7.19782e-05	0.00236364
Snora81	234.141	-0.76932	0.203407	-3.78218	0.000155462	0.00452002
Dnm1	228.383	-0.768639	0.200403	-3.83548	0.000125322	0.00378962
Sh3kbp1	307.505	-0.766595	0.197938	-3.87291	0.000107544	0.00330929
Slc6a4	120.504	-0.766185	0.204205	-3.75203	0.000175409	0.00503387
Sall4	782.496	-0.764827	0.166032	-4.60652	4.09472e-06	0.000207105
Snord22	652.386	-0.76234	0.181309	-4.20465	2.61483e-05	0.00102428
Serpinb9	175.891	-0.759906	0.203685	-3.73079	0.000190877	0.00539564
Mamld1	236.128	-0.756606	0.199339	-3.79558	0.000147301	0.00432115
Cgnl1	7349.16	-0.756307	0.0814112	-9.28996	1.54342e-20	8.85856e-18
Mmp16	272.584	-0.753987	0.191806	-3.93098	8.45994e-05	0.00270411
Map3k14	607.203	-0.7527	0.178716	-4.21171	2.53446e-05	0.00101192
Golim4	6490.23	-0.745012	0.102236	-7.28719	3.16483e-13	6.23567e-11
Slc16a2	274.323	-0.739318	0.197955	-3.73477	0.000187887	0.00534547
Hist1h2bp	106.94	-0.738453	0.204696	-3.60755	0.0003091	0.00801656
Fhl1	341.434	-0.736903	0.198803	-3.7067	0.000209973	0.0058478
Daam2	318.757	-0.736134	0.203259	-3.62166	0.000292722	0.0076706
BC018473	1017.28	-0.735216	0.171403	-4.2894	1.79159e-05	0.000750817
Cacna1g	201.893	-0.726985	0.204886	-3.54824	0.000387821	0.00964297
Tmem38b	7033.72	-0.726081	0.177825	-4.08313	4.44336e-05	0.00158961
Lass2	990.248	-0.724866	0.138533	-5.23243	1.67295e-07	1.21344e-05
Adamts10	810.831	-0.719465	0.144225	-4.9885	6.08488e-07	3.89935e-05
Ppp1r18	528.411	-0.713097	0.177723	-4.0124	6.01051e-05	0.00203971
Zfp128	218.87	-0.711815	0.198925	-3.57831	0.000345817	0.008796
Npr3	113.252	-0.710881	0.202341	-3.51328	0.000442605	0.0104944
Dpyd	426.562	-0.709814	0.178521	-3.97608	7.0061e-05	0.00231703
Armcx3	654.649	-0.707307	0.166291	-4.25344	2.10512e-05	0.000868427
D630003M21Rik	238.927	-0.706689	0.204259	-3.45977	0.000540641	0.0121584
Trpm3	188.485	-0.705992	0.2044	-3.45398	0.000552384	0.0122968
Cckar	770.102	-0.703551	0.147791	-4.76046	1.93149e-06	0.00010624
Kcp	105.034	-0.703429	0.201906	-3.48394	0.000494096	0.0113832
Tril	405.203	-0.703309	0.190519	-3.69154	0.000222898	0.00616158
Fhod3	185.453	-0.703229	0.201297	-3.49348	0.000476761	0.0110416
Tcea3	391.545	-0.702527	0.18926	-3.71196	0.000205662	0.005752
Mrc2	1153.95	-0.700048	0.126189	-5.54761	2.89604e-08	2.5487e-06
