# Supplementary material for: Delineating the early transcriptional specification of the mammalian trachea and esophagus
Source: eLife. 2020 Jun 9;9:e55526. doi: 10.7554/eLife.55526 (PMC7282815; doi:10.7554/eLife.55526)
Supplement: Figure 3—source data 1. [file elife-55526-fig3-data1.xlsx]

## Sheet: DEGenes Trachea vs Esophagus
Source Data 3, relates to Figure 3
Differentially expressed genes (DESeq2) WT trachea v.s. esophagus epithelium Thresholds: |log2FoldChange| > 0.7, padj < 0.05 baseMean: mean of normalized counts for all samples log2FoldChange: log2 fold change lfcSE: standard error stat: Wald statistic pvalue: Wald test p-value padj: BH adjusted p-values
Enriched in ESOPHAGUS, significant
Enriched in TRACHEA, significant
GeneName	baseMean	log2FoldChange	lfcSE	stat	pvalue	padj
Plxna4	291.05	5.93522	0.332319	17.86	2.41713e-71	6.4232e-69
Cldn18	184.015	5.80249	0.340691	17.0315	4.79503e-65	1.05261e-62
Pax7	151.765	5.56599	0.345023	16.1322	1.5141e-58	2.6361e-56
Foxi2	112.918	4.8377	0.367427	13.1664	1.36908e-39	1.3379e-37
Hapln1	141.969	4.81393	0.330282	14.5752	4.03978e-48	5.32092e-46
Crlf1	587.244	4.75476	0.192925	24.6457	4.09517e-134	3.10148e-131
Crabp1	160.273	4.59905	0.326243	14.097	3.96245e-45	4.61686e-43
Calcr	121.454	4.50759	0.340969	13.22	6.73123e-40	6.66392e-38
Elfn1	197.145	4.48887	0.28518	15.7405	7.98224e-56	1.31421e-53
Lmcd1	203.867	4.38141	0.283226	15.4697	5.55844e-54	8.28934e-52
Ptprt	312.14	4.34263	0.226816	19.1461	1.04351e-81	3.76335e-79
Tmem132d	92.5655	4.33727	0.371701	11.6687	1.84146e-31	1.29733e-29
Hhip	506.671	4.33682	0.20275	21.39	1.65705e-101	7.84357e-99
Tppp3	328.99	4.29358	0.253726	16.9221	3.09108e-64	6.41377e-62
Prdm6	135.425	4.28636	0.330873	12.9547	2.20996e-38	2.02874e-36
Ror1	239.213	4.22546	0.263875	16.0131	1.03482e-57	1.78118e-55
Unc5c	422.493	4.10181	0.246297	16.6539	2.83388e-62	5.50319e-60
Ascl1	84.3027	4.07452	0.364287	11.1849	4.83363e-29	2.97622e-27
Iigp1	76.118	4.01679	0.374216	10.7339	7.05699e-27	3.7506e-25
E030019B13Rik	1328.83	3.96654	0.385144	10.2988	7.13155e-25	3.4184e-23
Chdh	52.6389	3.93235	0.383871	10.2439	1.26018e-24	5.96496e-23
Filip1	61.6077	3.90559	0.377354	10.3499	4.18784e-25	2.02662e-23
Fads3	132.161	3.87109	0.321148	12.0539	1.84946e-33	1.39372e-31
Mical2	1712.21	3.84109	0.294898	13.0252	8.80295e-39	8.28188e-37
Pkhd1	241.504	3.7897	0.247149	15.3337	4.55619e-53	6.51062e-51
9430021M05Rik	53.0773	3.75443	0.38007	9.87826	5.17241e-23	2.18235e-21
Gfra1	390.43	3.75212	0.226702	16.5509	1.5778e-61	2.98737e-59
Wnt11	112.78	3.74732	0.343654	10.9044	1.09853e-27	6.20876e-26
A930038C07Rik	277.015	3.73184	0.242786	15.3709	2.56503e-53	3.73581e-51
Col12a1	1470.36	3.69868	0.356356	10.3792	3.08476e-25	1.51213e-23
Nkx2-1	2570.05	3.65116	0.365183	9.99818	1.55226e-23	6.69861e-22
Mest	617.364	3.62156	0.192752	18.7887	9.34445e-79	3.14534e-76
Wnt7b	5103.96	3.5624	0.284112	12.5387	4.58439e-36	3.92315e-34
Adamtsl1	208.703	3.52673	0.279917	12.5992	2.13376e-36	1.84686e-34
Slc24a3	73.3371	3.50716	0.352253	9.95638	2.36527e-23	1.01492e-21
Col1a2	545.393	3.49517	0.211417	16.5321	2.15358e-61	4.02719e-59
Cyp4f39	43.474	3.48609	0.390192	8.93428	4.09839e-19	1.37341e-17
Sez6l	74.6495	3.43747	0.372585	9.226	2.80927e-20	1.00359e-18
Ano1	348.335	3.40551	0.217349	15.6684	2.48868e-55	3.96801e-53
Wnt5a	315.242	3.36949	0.250679	13.4415	3.45516e-41	3.58461e-39
Ccdc80	136.525	3.3487	0.327499	10.2251	1.53131e-24	7.15889e-23
Dll4	188.93	3.33663	0.272407	12.2487	1.70736e-34	1.36112e-32
Ramp1	42.6879	3.31912	0.394244	8.41897	3.7982e-17	1.10213e-15
Scube1	174.194	3.30996	0.282962	11.6975	1.31215e-31	9.37504e-30
Ntrk2	83.8189	3.30088	0.33698	9.79547	1.17746e-22	4.84648e-21
Adamts3	164.149	3.29642	0.284588	11.5831	5.01924e-31	3.48745e-29
Daam2	227.719	3.29022	0.254995	12.9031	4.32447e-38	3.92232e-36
Angpt1	65.7006	3.28674	0.387816	8.47501	2.35059e-17	6.95397e-16
Nefm	164.944	3.27601	0.302575	10.8271	2.56219e-27	1.40614e-25
Kcnb2	194.386	3.27105	0.292701	11.1754	5.38142e-29	3.30009e-27
Thsd4	1073.48	3.26589	0.131445	24.8461	2.85189e-136	2.27356e-133
Gucy2f	45.6332	3.24263	0.390908	8.29514	1.08452e-16	3.05909e-15
Cpne4	47.0613	3.21954	0.391555	8.22244	1.99406e-16	5.51168e-15
3830431G21Rik	135.024	3.21468	0.331631	9.69355	3.21177e-22	1.29385e-20
Serpinf1	154.445	3.19763	0.287485	11.1227	9.72267e-29	5.89077e-27
Leprel1	356.679	3.1966	0.246514	12.9672	1.87752e-38	1.73407e-36
Col4a6	776.798	3.16024	0.14089	22.4306	1.97929e-111	1.15309e-108
Serpinb6b	198.998	3.1495	0.266027	11.839	2.45299e-32	1.77777e-30
Gldn	38.2254	3.14145	0.394361	7.96592	1.63995e-15	4.29762e-14
Rspo3	34.0561	3.13412	0.396058	7.91328	2.50686e-15	6.44676e-14
Gpr155	93.2492	3.09549	0.324591	9.53657	1.47632e-21	5.66123e-20
Pcdh10	3345.76	3.07731	0.185834	16.5595	1.36751e-61	2.62199e-59
Cdh2	479.233	3.05202	0.172356	17.7077	3.6588e-70	9.55515e-68
Kctd8	449.948	3.04857	0.173237	17.5977	2.56531e-69	6.5859e-67
Gpr126	769.073	3.04079	0.191634	15.8677	1.06036e-56	1.78458e-54
Rspo1	274.075	3.03951	0.396619	7.66354	1.80881e-14	4.3837e-13
Spock3	84.8671	3.03306	0.3385	8.96029	3.23827e-19	1.09411e-17
Ror2	168.174	3.02987	0.262901	11.5248	9.89906e-31	6.78467e-29
Irx1	1884.02	3.02382	0.395018	7.6549	1.93462e-14	4.67364e-13
Esrrb	82.1407	2.97339	0.335998	8.84944	8.79606e-19	2.89063e-17
Msn	1556.3	2.97321	0.113844	26.1164	2.37451e-150	2.76667e-147
Ngfr	79.5613	2.95958	0.36654	8.07438	6.78181e-16	1.81813e-14
Meox1	70.3901	2.95724	0.359549	8.22487	1.95405e-16	5.41096e-15
Scnn1a	131.922	2.95584	0.285504	10.3531	4.05302e-25	1.96766e-23
Prdm16	949.422	2.95154	0.135241	21.8243	1.36431e-105	7.12594e-103
Greb1l	361.387	2.93221	0.236838	12.3807	3.32591e-35	2.81439e-33
Kcnb1	33.6828	2.93154	0.394987	7.42188	1.15473e-13	2.62624e-12
Ces1d	327.911	2.92525	0.245774	11.9022	1.15261e-32	8.47505e-31
Gm19990	38.6369	2.92096	0.394744	7.39964	1.36556e-13	3.08718e-12
Sorcs1	94.9943	2.90337	0.320244	9.06613	1.23319e-19	4.26465e-18
Ankrd33b	110.981	2.89192	0.309537	9.34273	9.38833e-21	3.41019e-19
Edil3	55.6378	2.891	0.368711	7.84083	4.47586e-15	1.13182e-13
Zcchc12	44.1172	2.88741	0.391657	7.37228	1.67731e-13	3.78069e-12
Ets1	120.677	2.88022	0.297767	9.67274	3.93698e-22	1.5693e-20
Ptgis	209.268	2.86488	0.264253	10.8414	2.1899e-27	1.21503e-25
Corin	111.852	2.86282	0.334326	8.56296	1.1001e-17	3.40761e-16
Angpt2	61.5837	2.85595	0.36965	7.7261	1.10894e-14	2.76267e-13
Enox1	180.415	2.85076	0.277286	10.2809	8.58941e-25	4.10422e-23
Mtus2	1403.93	2.84398	0.261722	10.8664	1.66579e-27	9.31062e-26
Galnt5	31.0769	2.83629	0.399262	7.10384	1.21338e-12	2.52807e-11
Trim9	79.734	2.83512	0.331939	8.5411	1.32949e-17	4.05188e-16
Ccno	243.011	2.82667	0.387645	7.29189	3.05643e-13	6.72904e-12
Tbx3	424.329	2.82295	0.397972	7.09332	1.30929e-12	2.70926e-11
Fam189a2	110.499	2.809	0.292353	9.60824	7.37988e-22	2.89594e-20
Flrt1	257.552	2.7912	0.264464	10.5542	4.85887e-26	2.45324e-24
Hoxb1	31.9707	2.78935	0.400437	6.96577	3.26612e-12	6.52665e-11
Klhl14	31.7176	2.76579	0.400692	6.90253	5.1084e-12	9.95842e-11
Dmrt3	640.535	2.75097	0.14817	18.5663	6.02492e-77	1.90124e-74
Cpm	645.41	2.74257	0.193441	14.1778	1.25653e-45	1.48693e-43
Gria3	180.859	2.732	0.277592	9.84178	7.43823e-23	3.10377e-21
Nefl	66.1747	2.72278	0.363725	7.4858	7.11125e-14	1.65459e-12
C77370	92.333	2.7175	0.345338	7.8691	3.57206e-15	9.0782e-14
Gck	86.1953	2.70903	0.336872	8.04171	8.8591e-16	2.35833e-14
Hhex	725.802	2.70779	0.404514	6.69394	2.17247e-11	3.96941e-10
Itga9	1088.94	2.70719	0.108092	25.0451	1.97351e-138	1.66071e-135
Ntm	259.677	2.67116	0.249047	10.7256	7.72241e-27	4.08991e-25
Ly6h	385.764	2.66049	0.199513	13.335	1.44899e-40	1.46319e-38
Nrp2	3855.83	2.65069	0.360299	7.35692	1.88208e-13	4.22646e-12
Cacna1g	81.7964	2.62643	0.336989	7.79383	6.50101e-15	1.63031e-13
Grb14	224.556	2.62502	0.214302	12.2492	1.6972e-34	1.36019e-32
Nhsl2	1801.82	2.62035	0.127489	20.5535	7.16446e-94	3.01445e-91
5930403L14Rik	521.625	2.60504	0.32256	8.07614	6.68515e-16	1.79539e-14
Tnnt1	72.9966	2.5737	0.324573	7.92949	2.20054e-15	5.70539e-14
Zic5	26.0848	2.57326	0.402331	6.39589	1.5962e-10	2.71049e-09
Myt1l	37.2176	2.56868	0.399993	6.4218	1.34669e-10	2.30229e-09
Pde4b	186.057	2.56636	0.259095	9.90512	3.95495e-23	1.67803e-21
Six1	66.3629	2.56087	0.349737	7.32225	2.43839e-13	5.43152e-12
Nacad	77.2086	2.55635	0.335423	7.62128	2.51168e-14	6.0007e-13
Fbn2	6976.69	2.55582	0.285751	8.94424	3.74536e-19	1.26069e-17
Fbln5	317.912	2.53662	0.2486	10.2036	1.91067e-24	8.85043e-23
Rasgrp3	55.7614	2.53604	0.375453	6.75462	1.43206e-11	2.65827e-10
Tgfb2	2081.5	2.52149	0.248527	10.1457	3.46178e-24	1.55595e-22
Oat	2440.84	2.50317	0.206099	12.1454	6.06591e-34	4.66398e-32
Plcl1	470.493	2.4997	0.19371	12.9043	4.2564e-38	3.88384e-36
P2ry2	89.8546	2.49909	0.341865	7.31016	2.6683e-13	5.91201e-12
Speg	556.714	2.49527	0.144855	17.226	1.69476e-66	4.07469e-64
Slc1a3	174.734	2.48315	0.243834	10.1837	2.3435e-24	1.06919e-22
Ajap1	29.5664	2.47913	0.404517	6.12862	8.86468e-10	1.39739e-08
Ctxn3	21.5214	2.47856	0.404462	6.12805	8.89647e-10	1.40078e-08
Thbs3	778.805	2.47491	0.179799	13.7649	4.14489e-43	4.65057e-41
Creb5	150.549	2.46015	0.260546	9.44229	3.64731e-21	1.36747e-19
Scx	153.769	2.45232	0.266643	9.19702	3.68032e-20	1.30859e-18
Scn5a	301.198	2.44946	0.199277	12.2917	1.00351e-34	8.08517e-33
Spag17	55.7812	2.44556	0.377291	6.48191	9.05697e-11	1.57143e-09
Kcna5	32.5463	2.43773	0.388783	6.27016	3.60682e-10	5.91261e-09
Adam23	79.7609	2.42543	0.344501	7.04042	1.91657e-12	3.91243e-11
Ptprm	715.206	2.4222	0.393936	6.1487	7.81189e-10	1.24424e-08
Thsd7a	106.723	2.42182	0.338193	7.16105	8.0063e-13	1.72016e-11
Adrb1	114.132	2.41992	0.322426	7.50535	6.12639e-14	1.43648e-12
Spock1	56.4545	2.4142	0.369864	6.52726	6.69816e-11	1.17427e-09
Isl1	983.212	2.41056	0.169144	14.2515	4.38442e-46	5.2292e-44
Fam190a	192.222	2.41056	0.278344	8.66037	4.70245e-18	1.49639e-16
Cdc42ep1	101.393	2.40827	0.341579	7.05042	1.7838e-12	3.66113e-11
Maf	257.067	2.40632	0.215082	11.1879	4.67242e-29	2.8887e-27
Igf1	517.177	2.40032	0.396819	6.04891	1.45834e-09	2.24943e-08
Pgf	124.505	2.3982	0.282134	8.50022	1.89232e-17	5.69841e-16
Atoh8	80.8826	2.39496	0.336416	7.11904	1.08681e-12	2.28005e-11
Abcc3	32.8379	2.38802	0.400066	5.96906	2.38629e-09	3.59654e-08
Gata5	184.197	2.38755	0.402173	5.93662	2.90956e-09	4.34627e-08
Abcc8	47.5066	2.3866	0.383909	6.21656	5.08158e-10	8.20582e-09
Gprin3	178.983	2.37551	0.265031	8.96316	3.15508e-19	1.06913e-17
Nr2f2	10066	2.37439	0.21086	11.2605	2.05553e-29	1.3082e-27
Slc16a2	358.504	2.34978	0.185879	12.6415	1.24671e-36	1.09156e-34
Adcy7	260.139	2.33806	0.196333	11.9086	1.06765e-32	7.88864e-31
Micalcl	104.599	2.33702	0.329219	7.09868	1.25955e-12	2.61707e-11
Gm20554	484.402	2.31324	0.159516	14.5017	1.18245e-47	1.50509e-45
Gipc2	150.511	2.30876	0.269735	8.55937	1.13484e-17	3.50089e-16
Phf19	38.0852	2.30815	0.383701	6.0155	1.79336e-09	2.7494e-08
Dact1	428.885	2.27255	0.374584	6.06687	1.30426e-09	2.02001e-08
Mmp16	428.82	2.26866	0.17664	12.8434	9.36313e-38	8.29376e-36
Hoxb6	36.8175	2.2661	0.389355	5.82014	5.87994e-09	8.41015e-08
Klhdc8b	426.425	2.26439	0.18362	12.3319	6.09613e-35	5.01838e-33
Fam196a	21.0273	2.26364	0.404357	5.59812	2.16685e-08	2.89175e-07
6430527G18Rik	678.292	2.26276	0.134002	16.886	5.70407e-64	1.13684e-61
O3far1	126.406	2.26043	0.302172	7.48059	7.39917e-14	1.71631e-12
Npc1	1280.26	2.25903	0.130215	17.3484	2.02763e-67	5.03483e-65
Tgfbi	114.33	2.25865	0.342718	6.5904	4.38652e-11	7.84446e-10
Aqp4	19.7583	2.25235	0.404085	5.57395	2.49027e-08	3.29146e-07
Tceal3	31.8604	2.24904	0.398948	5.63743	1.7261e-08	2.33857e-07
Asxl3	1059.07	2.24573	0.283502	7.92142	2.34812e-15	6.06945e-14
Ptpre	134.387	2.24441	0.27154	8.2655	1.39113e-16	3.90212e-15
Muc1	315.335	2.2416	0.204908	10.9395	7.45756e-28	4.26263e-26
Tns1	1042.37	2.24119	0.114259	19.615	1.1508e-85	4.25151e-83
Smad9	717.323	2.24006	0.394428	5.67927	1.35275e-08	1.84762e-07
Sh3rf3	230.962	2.23466	0.227627	9.8172	9.49467e-23	3.94016e-21
Fat4	555.834	2.23348	0.171169	13.0484	6.49067e-39	6.14464e-37
Stc1	183.808	2.22996	0.230629	9.66903	4.08212e-22	1.62171e-20
Irx2	1635.11	2.22803	0.111327	20.0134	4.20543e-89	1.63333e-86
Cgnl1	5700.69	2.22098	0.209059	10.6237	2.31232e-26	1.18728e-24
Ildr2	100.172	2.22031	0.317744	6.98773	2.79372e-12	5.61227e-11
Limch1	866.739	2.2192	0.153307	14.4756	1.72916e-47	2.13498e-45
Cckar	587.021	2.21417	0.179694	12.3218	6.90974e-35	5.65739e-33
Slit2	2327.43	2.20599	0.107528	20.5155	1.56651e-93	6.41296e-91
Csrnp3	129.736	2.2024	0.27739	7.93973	2.02627e-15	5.27353e-14
Epha4	684.166	2.19962	0.172851	12.7255	4.26711e-37	3.75778e-35
3425401B19Rik	40.0541	2.19913	0.380792	5.77514	7.68882e-09	1.08844e-07
Eps8	706.444	2.19256	0.156038	14.0515	7.5448e-45	8.72374e-43
Cer1	58.4324	2.18363	0.354729	6.15578	7.47108e-10	1.1912e-08
Dlg2	38.2725	2.18096	0.396931	5.49456	3.91691e-08	5.08829e-07
Pamr1	56.0703	2.17917	0.362377	6.01355	1.81504e-09	2.77738e-08
Ica1l	30.272	2.17575	0.396016	5.4941	3.92712e-08	5.09718e-07
Bmp5	204.364	2.15863	0.257415	8.38579	5.03878e-17	1.45376e-15
Sall4	472.946	2.14871	0.213443	10.0669	7.73874e-24	3.40752e-22
Ncald	57.7199	2.14162	0.354641	6.03883	1.55234e-09	2.392e-08
Pde4a	226.888	2.13294	0.258398	8.25448	1.52569e-16	4.26378e-15
B130024G19Rik	104.996	2.12902	0.336541	6.32617	2.51314e-10	4.19235e-09
Abcc6	70.8045	2.12875	0.370711	5.74234	9.33758e-09	1.30718e-07
Cacna1c	250.508	2.12723	0.22649	9.39217	5.87782e-21	2.17149e-19
6530418L21Rik	130.796	2.12502	0.324984	6.53884	6.19969e-11	1.09067e-09
E130309F12Rik	117.62	2.11872	0.302774	6.99771	2.60177e-12	5.2336e-11
Gm6320	41.7149	2.10841	0.383183	5.50237	3.74709e-08	4.87605e-07
Hc	18.6304	2.09413	0.402776	5.19923	2.00119e-07	2.39242e-06
Zfhx4	902.159	2.08573	0.13568	15.3724	2.5067e-53	3.6863e-51
Acss1	113.329	2.08454	0.316404	6.58824	4.45056e-11	7.94961e-10
Tcea3	205.379	2.07648	0.220149	9.43219	4.01634e-21	1.50211e-19
Scn3a	22.1254	2.07159	0.404519	5.12111	3.03735e-07	3.53898e-06
Lect1	18.6326	2.06272	0.402386	5.12623	2.95605e-07	3.45222e-06
Pla2g16	106.359	2.0617	0.29891	6.8974	5.2964e-12	1.03116e-10
Atp6v1c2	35.3593	2.06168	0.395189	5.21694	1.81902e-07	2.18326e-06
Edn3	433.23	2.057	0.213168	9.64965	4.93255e-22	1.94566e-20
Gata6	167.692	2.04742	0.294725	6.94688	3.73451e-12	7.43319e-11
Pdlim3	20.6787	2.03208	0.404087	5.02882	4.93511e-07	5.59522e-06
Hcn1	35.9195	2.02534	0.396849	5.10356	3.3332e-07	3.8629e-06
Acsm1	17.0765	2.02526	0.403485	5.01942	5.18271e-07	5.85403e-06
Mylk3	27.9035	2.01759	0.403896	4.99531	5.87408e-07	6.55672e-06
Glp2r	58.3286	2.0146	0.354584	5.68159	1.3345e-08	1.82764e-07
Scube2	77.3027	2.01448	0.377492	5.33648	9.47672e-08	1.18533e-06
Id2	1628.03	2.00949	0.100535	19.9879	7.01826e-89	2.65764e-86
Fam19a5	169.472	2.00566	0.269302	7.44763	9.50335e-14	2.17772e-12
Pcsk1n	22.721	1.99676	0.40446	4.93685	7.93938e-07	8.68288e-06
Grid2	51.2588	1.99511	0.384285	5.19176	2.08312e-07	2.48253e-06
1810041L15Rik	37.7735	1.99009	0.397924	5.00117	5.69836e-07	6.37467e-06
Entpd3	566.494	1.98621	0.179659	11.0555	2.06253e-28	1.2109e-26
Zfp187	770.067	1.98583	0.142796	13.9068	5.76355e-44	6.61367e-42
Dgkk	157.527	1.9835	0.282258	7.02724	2.10656e-12	4.28297e-11
Frzb	75.7794	1.98226	0.369444	5.36552	8.07186e-08	1.01717e-06
D4Bwg0951e	257.695	1.97819	0.203451	9.72322	2.4007e-22	9.72285e-21
Rfx6	153.399	1.97291	0.252782	7.8048	5.95938e-15	1.49945e-13
Mfsd7c	48.7229	1.97257	0.388265	5.08046	3.76524e-07	4.33704e-06
Slit3	96.5967	1.97177	0.33287	5.92355	3.15071e-09	4.67422e-08
Map3k14	975.027	1.96286	0.135902	14.4431	2.76924e-47	3.38271e-45
Dlk1	881.049	1.96044	0.284517	6.89042	5.5628e-12	1.08025e-10
Rasgef1a	19.2677	1.96033	0.404524	4.84602	1.25963e-06	1.34458e-05
Pax6	16.0844	1.95904	0.402899	4.86235	1.15999e-06	1.24524e-05
Lama2	40.6026	1.95891	0.371955	5.26653	1.39029e-07	1.70241e-06
Hoxb8	17.4167	1.95641	0.40092	4.87981	1.06187e-06	1.14805e-05
Cdh16	149.535	1.95587	0.403325	4.84936	1.23858e-06	1.32492e-05
Dysf	84.9802	1.95413	0.310617	6.29111	3.152e-10	5.20647e-09
Mtap1b	8165.68	1.94695	0.0856585	22.7292	2.30635e-114	1.39737e-111
Dclk2	404.349	1.94131	0.192137	10.1038	5.31477e-24	2.36079e-22
Hlf	160.406	1.93965	0.286469	6.77092	1.27969e-11	2.39302e-10
Olfml3	104.713	1.93743	0.30364	6.38066	1.76323e-10	2.97413e-09
Ptpro	18.1164	1.9336	0.403626	4.79057	1.66306e-06	1.74569e-05
Cntn4	41.3745	1.93235	0.38793	4.98117	6.32007e-07	7.02349e-06
Galntl1	346.562	1.92949	0.184545	10.4554	1.38399e-25	6.89582e-24
Mmp23	88.9319	1.9273	0.318092	6.05893	1.37033e-09	2.118e-08
Fhl1	343.346	1.92053	0.1732	11.0885	1.42644e-28	8.54006e-27
Thbs4	23.6626	1.91503	0.403196	4.74962	2.03802e-06	2.09287e-05
Slit1	21.3339	1.9114	0.403636	4.73545	2.18569e-06	2.23241e-05
Rab6b	53.1319	1.90558	0.385495	4.94319	7.68541e-07	8.42337e-06
Dnajb4	1270.42	1.90301	0.12676	15.0127	6.06455e-51	8.35089e-49
Caskin1	127.601	1.89965	0.259337	7.32501	2.38879e-13	5.32887e-12
Rorc	78.722	1.89844	0.333686	5.68928	1.27574e-08	1.7567e-07
Wbscr17	42.3219	1.89712	0.375787	5.04839	4.45544e-07	5.08949e-06
Fabp3	151.472	1.89557	0.269304	7.03878	1.93937e-12	3.9536e-11
Col4a3	19.9126	1.89182	0.404289	4.67937	2.87758e-06	2.88272e-05
Ephb1	88.3688	1.88705	0.320975	5.87912	4.12445e-09	6.05359e-08
Stra6	171.905	1.87932	0.282756	6.64643	3.00281e-11	5.44713e-10
Car14	393.449	1.87922	0.39192	4.7949	1.62753e-06	1.71196e-05
Clstn2	99.9296	1.87534	0.285916	6.55907	5.41462e-11	9.61491e-10
Doc2b	294.746	1.87284	0.220728	8.48483	2.16028e-17	6.45399e-16
Nkx2-5	28.6257	1.86065	0.40152	4.63403	3.58618e-06	3.53415e-05
Cacna2d3	91.624	1.85814	0.361875	5.13476	2.82509e-07	3.3181e-06
Gxylt2	16.5216	1.85597	0.403048	4.60482	4.12822e-06	4.04202e-05
Gas1	134.641	1.84477	0.301412	6.12044	9.3318e-10	1.46627e-08
Hoxb5	38.6495	1.84348	0.391264	4.71161	2.45767e-06	2.49005e-05
Grin2d	283.102	1.84209	0.225127	8.18246	2.7811e-16	7.65914e-15
Slc6a15	138.459	1.8317	0.270513	6.77123	1.27689e-11	2.39271e-10
Acss3	99.3273	1.82992	0.322196	5.67953	1.35068e-08	1.84646e-07
A4galt	87.1307	1.81567	0.323555	5.61161	2.00447e-08	2.68688e-07
Cntfr	305.613	1.81437	0.403989	4.49114	7.08417e-06	6.65657e-05
Gm3893	24.2876	1.81182	0.404021	4.48447	7.30957e-06	6.85136e-05
Kcnn3	26.1354	1.80887	0.403817	4.47945	7.48375e-06	6.9973e-05
Cyp26b1	28.6151	1.80353	0.404247	4.46145	8.14065e-06	7.57876e-05
Mbip	726.349	1.80343	0.148441	12.1491	5.79879e-34	4.48134e-32
Gucy1a3	22.4316	1.80223	0.402871	4.47347	7.69618e-06	7.19149e-05
Aebp1	32.9273	1.80042	0.391242	4.6018	4.18847e-06	4.09837e-05
Ttn	48.6571	1.79031	0.3955	4.52669	5.99153e-06	5.70419e-05
Sfrp4	17.5789	1.79029	0.403179	4.44044	8.9774e-06	8.29657e-05
Trpc3	52.2491	1.78898	0.357544	5.00352	5.62941e-07	6.31619e-06
Igsf5	63.3378	1.78156	0.338277	5.26657	1.38999e-07	1.70241e-06
Des	26.5168	1.77896	0.403122	4.41295	1.01973e-05	9.33844e-05
Ankrd34b	21.4553	1.77839	0.404514	4.39635	1.10084e-05	0.000100027
Gm5567	41.6107	1.771	0.370599	4.77876	1.76376e-06	1.83992e-05
Add3	8144.66	1.7687	0.0741767	23.8444	1.15824e-125	7.62778e-123
Rem2	215.958	1.7663	0.274274	6.43989	1.19562e-10	2.04865e-09
Efcab5	75.8699	1.76358	0.356502	4.94689	7.54066e-07	8.2767e-06
Gnb4	17.5256	1.76276	0.403722	4.36627	1.26389e-05	0.000113817
Gpr85	187.429	1.76261	0.395902	4.45213	8.50211e-06	7.89585e-05
Mtap1a	449.733	1.75449	0.20279	8.65177	5.07074e-18	1.60014e-16
Col11a1	1153.97	1.75382	0.130359	13.4537	2.92633e-41	3.07814e-39
Kcnj13	14.3364	1.75217	0.399888	4.38166	1.17778e-05	0.000106762
Myl9	97.0049	1.7516	0.317288	5.52054	3.37958e-08	4.41298e-07
Lgr5	535.787	1.74913	0.171717	10.1861	2.28639e-24	1.04945e-22
Inpp5j	29.6222	1.747	0.394794	4.42509	9.64024e-06	8.86586e-05
Slc15a2	268.211	1.74342	0.374093	4.66038	3.15619e-06	3.14105e-05
Hs3st3b1	153.307	1.74175	0.28482	6.11527	9.63923e-10	1.50832e-08
Stk32c	37.8872	1.74044	0.371454	4.68547	2.79313e-06	2.80368e-05
AW551984	75.1108	1.73927	0.320838	5.42102	5.9259e-08	7.56189e-07
Syne1	558.678	1.73645	0.153503	11.3121	1.14303e-29	7.43221e-28
Nuak1	2174.85	1.73639	0.110132	15.7665	5.29453e-56	8.81278e-54
Rin3	112.67	1.73505	0.310511	5.58771	2.30086e-08	3.05176e-07
Lin7a	49.926	1.72728	0.361721	4.77518	1.79546e-06	1.86913e-05
Unc5d	49.0924	1.72497	0.358423	4.81265	1.48941e-06	1.57763e-05
Vcam1	229.902	1.7205	0.235088	7.31853	2.50698e-13	5.57609e-12
Kcnab1	22.0283	1.71949	0.404244	4.25359	2.10373e-05	0.000180641
Stbd1	333.769	1.71867	0.183565	9.36269	7.77307e-21	2.84393e-19
Sec14l4	29.6101	1.71862	0.397245	4.32634	1.51606e-05	0.000133822
Tgfb3	173.593	1.71813	0.249404	6.88895	5.6205e-12	1.09006e-10
S100g	17.8496	1.71769	0.403159	4.26056	2.03913e-05	0.000175892
Ptk2b	49.1108	1.71421	0.368438	4.65264	3.27704e-06	3.25704e-05
Fcgrt	16.7396	1.71335	0.401909	4.26304	2.01668e-05	0.000174254
Tgfbr2	134.328	1.71294	0.269287	6.361	2.00444e-10	3.37723e-09
Vwde	13.048	1.7124	0.396164	4.32247	1.54295e-05	0.000136116
Mapk10	181.726	1.70652	0.254773	6.69822	2.10974e-11	3.85944e-10
Myo1a	15.6233	1.70483	0.401996	4.24091	2.2262e-05	0.000190402
Fkbp10	569.027	1.70456	0.166558	10.234	1.39585e-24	6.56611e-23
Nkx2-6	12.9169	1.70081	0.395886	4.29622	1.73736e-05	0.000151939
Myo16	552.006	1.69888	0.337765	5.02979	4.91016e-07	5.5711e-06
Brsk2	81.0538	1.69462	0.304596	5.56349	2.6443e-08	3.48895e-07
Slc9a7	56.0779	1.69071	0.378524	4.46658	7.94787e-06	7.40839e-05
Lrrn3	1199.69	1.68957	0.395936	4.26729	1.97864e-05	0.000171358
Cds1	137.806	1.68904	0.271601	6.21883	5.0087e-10	8.09677e-09
Slc30a2	15.3562	1.68796	0.401771	4.20131	2.65378e-05	0.000224187
Sema6d	138.565	1.68503	0.303108	5.55915	2.71083e-08	3.57363e-07
Samd4	340.779	1.6837	0.173791	9.68807	3.38872e-22	1.35791e-20
Masp1	94.0476	1.68227	0.401637	4.18853	2.80766e-05	0.000236002
Igdcc3	792.697	1.68208	0.176626	9.52341	1.67596e-21	6.36235e-20
Dio2	15.9024	1.67692	0.401312	4.1786	2.93309e-05	0.000244915
Thrb	22.8237	1.67656	0.403726	4.15272	3.28551e-05	0.000270612
Slc22a3	13.7563	1.66622	0.394539	4.2232	2.40859e-05	0.000204845
Caps2	42.8952	1.66188	0.375394	4.42702	9.5543e-06	8.79216e-05
Col4a4	66.4043	1.66113	0.33302	4.98808	6.09837e-07	6.79206e-06
Atp8a1	1075.9	1.6596	0.122385	13.5605	6.86634e-42	7.42889e-40
Lingo1	73.6925	1.6596	0.330664	5.01898	5.19461e-07	5.8631e-06
Ttll7	87.5795	1.65785	0.313804	5.28307	1.27039e-07	1.56444e-06
Efna1	946.614	1.65663	0.135709	12.2072	2.84515e-34	2.22141e-32
Kcnj11	34.3917	1.65486	0.396335	4.17541	2.97448e-05	0.000247569
Foxp2	2680.55	1.65445	0.0967342	17.103	1.4088e-65	3.2332e-63
Eno3	295.703	1.65084	0.213953	7.71589	1.20144e-14	2.98822e-13
Adam12	72.0549	1.64449	0.320624	5.12902	2.91251e-07	3.41189e-06
Tmem59l	39.3845	1.6419	0.39535	4.15302	3.28115e-05	0.0002704
Gprc5a	190.256	1.63849	0.288145	5.68633	1.29799e-08	1.78248e-07
Osr2	454.733	1.63784	0.194455	8.42273	3.67823e-17	1.06937e-15
D430041D05Rik	200.034	1.63218	0.284586	5.73528	9.73491e-09	1.35778e-07
Foxg1	34.6956	1.62791	0.404298	4.02652	5.66093e-05	0.000442218
Fgf5	21.8877	1.62715	0.40428	4.0248	5.70229e-05	0.000445219
Ndst3	23.2496	1.62654	0.403635	4.02973	5.58401e-05	0.000437337
Sesn3	1710.49	1.62454	0.103719	15.663	2.71016e-55	4.23204e-53
Synm	64.8014	1.62444	0.35725	4.54706	5.43992e-06	5.2118e-05
Man1c1	76.3434	1.62322	0.334915	4.84666	1.25557e-06	1.3412e-05
Rragd	503.178	1.61778	0.158088	10.2334	1.40505e-24	6.58893e-23
Fam107a	45.5197	1.61583	0.366489	4.40895	1.0387e-05	9.48357e-05
Gnai1	345.433	1.61384	0.172724	9.34343	9.32629e-21	3.3958e-19
Sardh	18.6847	1.61155	0.402583	4.00302	6.25395e-05	0.000484767
Golim4	6580.47	1.60969	0.0878808	18.3168	6.08097e-75	1.84217e-72
Prkca	100.825	1.60709	0.288252	5.5753	2.47105e-08	3.26891e-07
3110082D06Rik	13.8555	1.60599	0.392434	4.09238	4.26961e-05	0.000342541
Lphn3	712.421	1.60367	0.154755	10.3626	3.66797e-25	1.78645e-23
Prdm1	58.0943	1.60027	0.367022	4.36014	1.29981e-05	0.000116567
Slc7a11	73.5017	1.5991	0.33712	4.74341	2.10145e-06	2.15363e-05
Arrb1	473.267	1.59765	0.159391	10.0235	1.20208e-23	5.21716e-22
Arhgef6	175.729	1.59633	0.246836	6.46716	9.98595e-11	1.72471e-09
Clic6	483.564	1.59525	0.158663	10.0543	8.79178e-24	3.84882e-22
Fstl5	22.2251	1.59183	0.404435	3.93594	8.2871e-05	0.000622952
Foxc1	395.392	1.58963	0.196691	8.08186	6.37866e-16	1.71612e-14
Kcnn2	32.9456	1.58803	0.380183	4.177	2.95376e-05	0.000246369
Gsn	73.9799	1.58732	0.308062	5.15259	2.56912e-07	3.02836e-06
Fmnl1	260.373	1.58706	0.229531	6.91437	4.69948e-12	9.19678e-11
Gm166	117.773	1.58091	0.274342	5.76255	8.28525e-09	1.16741e-07
Pitpnm3	44.0579	1.5799	0.375075	4.21222	2.52875e-05	0.000214703
Nr2f1	60.4393	1.57925	0.357893	4.41265	1.02114e-05	9.34576e-05
Gfra4	12.7302	1.57852	0.398254	3.9636	7.38279e-05	0.000563361
Cthrc1	73.1889	1.5725	0.364983	4.30842	1.64422e-05	0.000144461
Moxd1	946.348	1.56942	0.160316	9.78956	1.24833e-22	5.10405e-21
Chrna4	22.8427	1.56823	0.402626	3.89501	9.81962e-05	0.00072768
Cdkn1c	10397.8	1.56683	0.147442	10.6268	2.23659e-26	1.1523e-24
Col6a2	40.4808	1.56582	0.373467	4.19265	2.7571e-05	0.000232139
Arap3	117.06	1.5657	0.268985	5.82075	5.85851e-09	8.38742e-08
Hmha1	212.095	1.56445	0.219356	7.132	9.89198e-13	2.08682e-11
St18	14.367	1.56136	0.400045	3.90297	9.50209e-05	0.000705876
Ky	12.7742	1.55902	0.391002	3.98725	6.68425e-05	0.000513941
Ptchd1	34.5816	1.55518	0.388319	4.0049	6.20433e-05	0.000481439
Ccdc30	82.1031	1.55421	0.343749	4.52137	6.14414e-06	5.8287e-05
Tox2	117.271	1.55276	0.269677	5.75784	8.51996e-09	1.19937e-07
Dtx4	999.081	1.55183	0.271052	5.7252	1.03313e-08	1.43699e-07
Matn4	17.6542	1.55161	0.403643	3.84403	0.000121029	0.000877981
Dclk1	155.905	1.55159	0.25775	6.01976	1.74675e-09	2.68065e-08
2010300C02Rik	333.432	1.5489	0.184741	8.38419	5.10777e-17	1.47086e-15
Cdkn2b	43.527	1.54819	0.384978	4.0215	5.78296e-05	0.00045128
Slc6a17	349.338	1.54687	0.174484	8.86541	7.62228e-19	2.5319e-17
Dusp8	76.0704	1.54424	0.314682	4.90729	9.23437e-07	1.00484e-05
Sh3pxd2a	1293.9	1.54111	0.112563	13.6911	1.14714e-42	1.2683e-40
Crb2	49.8947	1.53999	0.384573	4.00442	6.21699e-05	0.000482175
Gcgr	36.9046	1.53855	0.384763	3.99869	6.36933e-05	0.000492729
Ripply3	151.879	1.53527	0.241659	6.35303	2.11115e-10	3.54653e-09
Six2	85.9327	1.53136	0.395823	3.86881	0.000109368	0.000801834
Ret	85.2278	1.53104	0.305434	5.01267	5.36787e-07	6.04964e-06
Sema5b	96.2584	1.53021	0.333964	4.58196	4.60635e-06	4.47833e-05
Pik3r3	2173.01	1.52965	0.0888392	17.2182	1.93794e-66	4.58656e-64
Fam65b	31.8342	1.52622	0.381865	3.99675	6.4219e-05	0.000496035
Prkcb	221.476	1.5246	0.265027	5.75261	8.78758e-09	1.23474e-07
Eps8l1	212.063	1.52174	0.259183	5.8713	4.32397e-09	6.32193e-08
5330426P16Rik	38.434	1.52049	0.385712	3.94204	8.07927e-05	0.000609142
Pde3a	92.485	1.51878	0.315488	4.81406	1.47892e-06	1.56981e-05
Hadh	3396.62	1.51242	0.0986518	15.3309	4.75652e-53	6.73336e-51
Galnt13	21.8953	1.51048	0.4037	3.74159	0.000182858	0.00127579
Gm98	1014.01	1.50883	0.145522	10.3684	3.45263e-25	1.687e-23
Sncaip	186.107	1.50673	0.22997	6.55186	5.68252e-11	1.00318e-09
Mdga1	65.4681	1.50643	0.336918	4.47119	7.77856e-06	7.25504e-05
Tbc1d30	215.752	1.50529	0.203	7.4152	1.21438e-13	2.75363e-12
Rnasel	90.9017	1.50079	0.301109	4.98421	6.22162e-07	6.91916e-06
Tlr5	42.304	1.5007	0.358984	4.18041	2.9098e-05	0.000243641
Amph	148.661	1.49982	0.264836	5.66322	1.4856e-08	2.0236e-07
Ccdc151	71.9135	1.49805	0.315587	4.74686	2.06599e-06	2.12016e-05
Hs3st3a1	55.139	1.49802	0.361933	4.13895	3.48893e-05	0.000286588
Etv5	784.828	1.49758	0.331083	4.52327	6.08928e-06	5.78635e-05
Me1	299.115	1.49654	0.179828	8.32206	8.6445e-17	2.45203e-15
Rbpms	778.039	1.49534	0.151511	9.8695	5.6443e-23	2.37484e-21
Grm4	10.8788	1.4881	0.388766	3.82776	0.000129313	0.000932716
Wscd1	282.104	1.48639	0.20951	7.09461	1.29719e-12	2.68791e-11
Mamdc2	25.9107	1.48597	0.404504	3.67355	0.000239199	0.00162255
Rab36	190.81	1.48129	0.252134	5.87501	4.2281e-09	6.18772e-08
Snx25	73.0164	1.47868	0.328718	4.49831	6.84951e-06	6.44808e-05
Sult2b1	32.4489	1.47693	0.397065	3.71962	0.000199527	0.00137687
Ncam1	365.961	1.47559	0.170327	8.66328	4.58376e-18	1.46169e-16
Celf2	1143.01	1.46951	0.11125	13.209	7.78676e-40	7.65884e-38
Slco4a1	44.8938	1.46915	0.368877	3.98278	6.81149e-05	0.000523459
Hmgcll1	280.209	1.46899	0.190446	7.71338	1.2253e-14	3.03758e-13
B3gnt7	190.542	1.46883	0.25574	5.74348	9.27517e-09	1.29964e-07
Ank	471.11	1.46549	0.202726	7.2289	4.86908e-13	1.06271e-11
Id1	687.213	1.4652	0.171909	8.52309	1.55345e-17	4.70603e-16
Mbnl1	2307.85	1.46449	0.0833737	17.5653	4.54288e-69	1.14685e-66
Lrrc8c	100.311	1.46342	0.294681	4.96613	6.83027e-07	7.55169e-06
Mertk	286.491	1.46104	0.192323	7.5968	3.03549e-14	7.24073e-13
Mfap4	383.981	1.45999	0.204468	7.14043	9.30416e-13	1.97936e-11
0610040J01Rik	565.595	1.45954	0.152426	9.57537	1.01489e-21	3.96199e-20
Tdrkh	283.066	1.4595	0.215893	6.76029	1.37715e-11	2.56262e-10
Penk	31.4922	1.45618	0.39472	3.68913	0.00022502	0.00153418
Sh3gl2	258.116	1.45512	0.269616	5.39702	6.7758e-08	8.61015e-07
Epn3	528.76	1.45435	0.174028	8.35697	6.43525e-17	1.83915e-15
Phlda2	19.4679	1.45412	0.403154	3.60687	0.000309912	0.00205718
Ppm1e	12.7113	1.45332	0.396889	3.66177	0.000250476	0.00168921
Hspa12b	24.9318	1.45122	0.395539	3.66896	0.000243535	0.00165048
Dpysl4	492.489	1.45023	0.340768	4.25578	2.08321e-05	0.000179083
Syt11	621.87	1.44836	0.178479	8.11503	4.85664e-16	1.31129e-14
Cd55	414.058	1.44607	0.212767	6.79648	1.07203e-11	2.01966e-10
Thbs1	3292.7	1.44451	0.208102	6.94135	3.8836e-12	7.7198e-11
Tesc	22.0426	1.44429	0.403332	3.58089	0.000342423	0.00225117
Dock10	23.1649	1.44258	0.404485	3.56646	0.00036183	0.00236438
Arg2	41.9337	1.44231	0.373009	3.8667	0.000110319	0.00080725
Cacna2d2	57.705	1.44138	0.381782	3.77539	0.000159757	0.00112289
Cldn9	132.612	1.43901	0.254145	5.66214	1.49498e-08	2.03454e-07
Mxra8	75.8308	1.43887	0.311706	4.61612	3.90988e-06	3.84066e-05
P2rx6	25.4152	1.43878	0.402545	3.57422	0.00035128	0.0023024
Hivep2	1514.03	1.43706	0.128612	11.1737	5.48713e-29	3.35135e-27
Plcb1	406.137	1.43653	0.195392	7.35202	1.95227e-13	4.36152e-12
Mdfic	193.307	1.43568	0.252438	5.68726	1.29091e-08	1.77435e-07
Mmp2	224.461	1.43518	0.232449	6.17417	6.65106e-10	1.06382e-08
Il13ra1	867.475	1.43462	0.123697	11.5979	4.22474e-31	2.94894e-29
Stam	1509.88	1.43358	0.111394	12.8695	6.68571e-38	6.02788e-36
Dmd	395.652	1.43248	0.181692	7.88412	3.16769e-15	8.07761e-14
Mpped2	167.267	1.43175	0.291246	4.91593	8.83619e-07	9.64278e-06
Ust	332.42	1.42779	0.179	7.9765	1.50541e-15	3.95875e-14
Sh3bgr	21.8928	1.4277	0.400997	3.56038	0.000370317	0.00241098
9430020K01Rik	236.557	1.4239	0.280633	5.0739	3.89733e-07	4.47897e-06
Akap17b	279.289	1.42152	0.214615	6.62357	3.5062e-11	6.34508e-10
Adrbk2	458.657	1.42084	0.177021	8.02642	1.00358e-15	2.6622e-14
Cadps2	402.257	1.41666	0.209435	6.76421	1.34037e-11	2.49724e-10
Akr1c19	66.8922	1.41635	0.387223	3.6577	0.000254485	0.00171396
Gpr156	26.2201	1.41443	0.397247	3.56057	0.000370049	0.00241081
Slc38a4	1645.02	1.40981	0.123152	11.4477	2.41537e-30	1.64061e-28
Abr	3797.41	1.40835	0.095243	14.7869	1.77837e-49	2.3838e-47
F2rl1	100.094	1.40743	0.295025	4.77053	1.83737e-06	1.90751e-05
Fam43a	136.416	1.40543	0.25896	5.42721	5.72417e-08	7.32297e-07
Bmp3	157.371	1.40505	0.274886	5.11138	3.19815e-07	3.71775e-06
Ankfn1	31.4926	1.40457	0.401353	3.49959	0.000465983	0.00294216
Mapk12	210.62	1.40446	0.279515	5.02463	5.04406e-07	5.70593e-06
Trim46	107.76	1.40325	0.335698	4.1801	2.91377e-05	0.000243705
Il15	20.1664	1.40291	0.400236	3.50521	0.000456248	0.00289033
Cpxm2	16.3002	1.39882	0.404429	3.45875	0.000542695	0.00337032
Mchr1	12.7338	1.39745	0.392294	3.56224	0.000367704	0.00239863
Pgm5	64.1067	1.39672	0.353993	3.94563	7.95922e-05	0.000601588
Ntng1	57.645	1.3963	0.354241	3.94166	8.09206e-05	0.000609803
Prkg2	27.6207	1.3948	0.400459	3.48299	0.000495842	0.00310994
Myo5c	4532.13	1.39463	0.174417	7.99591	1.28624e-15	3.40011e-14
Scg5	16.0478	1.39255	0.402755	3.45757	0.000545073	0.00338092
Cntn2	61.5966	1.38972	0.325081	4.27499	1.91145e-05	0.000166013
Lpl	187.024	1.38743	0.226804	6.11729	9.51821e-10	1.49092e-08
Foxd2	31.2299	1.38502	0.390165	3.54984	0.00038546	0.00250153
Cttnbp2	544.673	1.38442	0.165896	8.34509	7.116e-17	2.02225e-15
Sfmbt2	89.3143	1.38365	0.290851	4.75725	1.96248e-06	2.02353e-05
Col5a1	3320.38	1.38079	0.0731848	18.8672	2.12398e-79	7.48185e-77
Trim71	364.608	1.37985	0.224805	6.138	8.35682e-10	1.3213e-08
Zfp641	56.7581	1.37453	0.350085	3.92628	8.62692e-05	0.000646251
Rgs11	224.274	1.37333	0.20724	6.62672	3.43219e-11	6.21858e-10
Col6a1	27.5129	1.37232	0.400472	3.42675	0.000610839	0.00373531
Lmo1	22.7694	1.37202	0.40419	3.39449	0.000687564	0.00415253
Pdgfb	28.8183	1.37018	0.389245	3.52011	0.00043137	0.00275811
Akr1b8	33.6298	1.37005	0.396421	3.45605	0.000548158	0.0033945
Chrnb4	39.2255	1.36939	0.398566	3.43578	0.000590849	0.00363067
Crip2	541.624	1.36621	0.157437	8.67785	4.03322e-18	1.28884e-16
Asphd2	50.0585	1.36215	0.357013	3.81542	0.000135954	0.00097274
Loxl3	156.89	1.36187	0.280713	4.85146	1.22557e-06	1.31192e-05
Cacna2d1	114.372	1.36139	0.288955	4.71142	2.45996e-06	2.49052e-05
Col4a5	1968.53	1.36123	0.0936262	14.539	6.85868e-48	8.9559e-46
St8sia6	16.6926	1.35994	0.401898	3.38379	0.000714922	0.00430402
Ltk	39.5642	1.3599	0.373914	3.63693	0.000275911	0.00184269
Add2	97.4638	1.35857	0.344106	3.9481	7.87737e-05	0.000596353
Mapk8ip1	1141.39	1.35306	0.117121	11.5527	7.15444e-31	4.94833e-29
Gstm7	45.6007	1.34937	0.39208	3.44157	0.000578338	0.00356391
Gm606	30.5006	1.34833	0.389431	3.46232	0.000535548	0.00333277
Stk36	310.51	1.34613	0.184426	7.29901	2.89904e-13	6.39182e-12
Cd83	73.2187	1.34528	0.334004	4.02773	5.63184e-05	0.0004404
Slc4a5	131.911	1.34503	0.382016	3.52088	0.000430117	0.00275126
Kif26a	276.701	1.34496	0.231042	5.8213	5.83935e-09	8.36789e-08
Dtx1	47.1251	1.34319	0.374354	3.58802	0.000333198	0.00219911
Mycbpap	143.685	1.34106	0.266587	5.03047	4.89279e-07	5.55555e-06
Fam176a	63.6806	1.34053	0.342635	3.91243	9.13736e-05	0.000680785
Pmp22	9.84077	1.33876	0.381738	3.50703	0.00045314	0.00287185
Slc35d3	14.0091	1.33718	0.396575	3.37182	0.000746742	0.00448312
9530077C05Rik	67.4988	1.3369	0.323625	4.13103	3.61139e-05	0.000295525
Trp53inp2	758.904	1.33547	0.132861	10.0517	9.03212e-24	3.94264e-22
Wdr52	20.8551	1.33473	0.402953	3.31238	0.000925065	0.00539943
Pnmal2	293.408	1.33447	0.187566	7.11468	1.12175e-12	2.34361e-11
Ldb2	41.8701	1.33438	0.389885	3.4225	0.000620471	0.00378963
Egr1	1623.48	1.3312	0.277875	4.79063	1.66259e-06	1.74569e-05
Dzip1l	1318.46	1.32969	0.136093	9.77043	1.50804e-22	6.14042e-21
Abca13	31.2001	1.32858	0.40383	3.28995	0.00100204	0.00578645
Dnm1	142.089	1.32788	0.259189	5.12323	3.00345e-07	3.50218e-06
Eno2	85.5161	1.32504	0.314506	4.21308	2.51908e-05	0.000214002
Sparc	4133.13	1.32447	0.0737099	17.9687	3.4274e-72	9.43906e-70
Lrrc7	19.7886	1.32168	0.402378	3.28468	0.00102098	0.00588687
Samd5	597.489	1.31984	0.171785	7.68308	1.55307e-14	3.80097e-13
Atp11c	719.038	1.31958	0.122214	10.7974	3.54212e-27	1.91616e-25
Fndc3c1	772.533	1.31882	0.14387	9.16676	4.87431e-20	1.72101e-18
Fli1	9.06037	1.31754	0.380962	3.45846	0.000543275	0.00337115
Bcorl1	943.54	1.31682	0.140395	9.37944	6.63262e-21	2.44439e-19
Fam38b	113.207	1.30577	0.284206	4.59444	4.33917e-06	4.23215e-05
Trpm3	167.351	1.30387	0.223204	5.84162	5.1696e-09	7.48604e-08
Parvb	50.7974	1.30374	0.365345	3.56853	0.00035899	0.00234886
Stk39	1252.32	1.30357	0.106763	12.21	2.74973e-34	2.15804e-32
Irs4	2077.53	1.3014	0.376237	3.459	0.000542183	0.00336852
Slc9a5	135.485	1.30132	0.255185	5.09952	3.40513e-07	3.93721e-06
Apba2	621.948	1.30081	0.154081	8.44237	3.10976e-17	9.12858e-16
Elavl2	97.2786	1.29915	0.333065	3.90059	9.59568e-05	0.000712479
Hcn4	98.1683	1.29844	0.328305	3.95497	7.6545e-05	0.00058175
Enpep	15.931	1.29767	0.401913	3.22873	0.00124342	0.00699891
Cldn3	868.079	1.29715	0.127546	10.1701	2.69646e-24	1.22653e-22
Fam160a1	360.633	1.29645	0.181654	7.13694	9.54319e-13	2.02087e-11
Coro2b	566.758	1.2941	0.177814	7.27787	3.39129e-13	7.44462e-12
Slc24a4	9.1304	1.29373	0.379491	3.40911	0.000651753	0.00395993
Filip1l	624.65	1.28892	0.132882	9.6997	3.02386e-22	1.2214e-20
Klf6	1792.16	1.2871	0.127703	10.0788	6.85452e-24	3.03583e-22
Stx1b	47.9318	1.28686	0.368104	3.49591	0.000472453	0.00297681
Arfgef1	6817.1	1.28586	0.0755077	17.0296	4.95718e-65	1.05755e-62
Islr	271.757	1.28268	0.211967	6.05135	1.43637e-09	2.2178e-08
Sphkap	18.2531	1.2812	0.403634	3.17418	0.00150263	0.00826744
B630019K06Rik	145.436	1.28106	0.243149	5.26861	1.37459e-07	1.68727e-06
Ttc21a	15.713	1.28083	0.403644	3.17317	0.00150786	0.0082812
Slc8a2	527.214	1.28035	0.151878	8.43012	3.45322e-17	1.01172e-15
Tmem108	190.661	1.27971	0.254342	5.03146	4.86754e-07	5.53103e-06
Ebf3	34.6979	1.27883	0.386684	3.30716	0.000942461	0.00548634
Zfp365	260.901	1.27758	0.22272	5.73628	9.6779e-09	1.35107e-07
Arhgdig	159.032	1.27654	0.274993	4.64207	3.44936e-06	3.41263e-05
Fam13a	237.971	1.27537	0.205059	6.21955	4.98578e-10	8.06833e-09
Igfbp7	29.4318	1.27414	0.399007	3.19327	0.0014067	0.00780835
Rassf6	72.6685	1.27341	0.323008	3.94234	8.06915e-05	0.000608682
Dusp3	252.878	1.27242	0.218245	5.83026	5.53402e-09	7.96872e-08
Slc44a3	38.6151	1.27077	0.390181	3.25687	0.00112649	0.00642433
Slc27a6	43.0785	1.27037	0.38079	3.33613	0.000849523	0.00501666
Fam163a	9.01437	1.26853	0.383692	3.30611	0.000945997	0.00550481
6030419C18Rik	89.3948	1.26616	0.288609	4.38712	1.14863e-05	0.000104244
Pid1	20.6919	1.26605	0.401185	3.15578	0.00160069	0.00872773
Cry2	1373.63	1.26549	0.130017	9.73326	2.17513e-22	8.83288e-21
Zdbf2	2310.91	1.26544	0.105465	11.9986	3.61178e-33	2.69496e-31
Egfr	234.268	1.26539	0.2073	6.10414	1.03354e-09	1.61558e-08
Dixdc1	496.033	1.26228	0.166345	7.58836	3.23966e-14	7.70348e-13
Trpv6	40.2227	1.26177	0.370039	3.40983	0.000650045	0.00395114
Ccdc19	65.9768	1.26166	0.345672	3.64988	0.000262367	0.00176234
Islr2	18.1923	1.2606	0.402805	3.12956	0.0017507	0.00944031
Ccdc157	371.686	1.26036	0.181803	6.93255	4.13318e-12	8.17302e-11
Vgll3	78.2975	1.25961	0.3417	3.68632	0.000227522	0.00154819
Fam114a1	324.073	1.25651	0.191686	6.55506	5.56204e-11	9.84209e-10
Rufy3	165.534	1.25467	0.236436	5.30657	1.11705e-07	1.38916e-06
Bend7	841.14	1.25341	0.118147	10.6089	2.71025e-26	1.37759e-24
Mafb	291.2	1.2523	0.219301	5.7104	1.12709e-08	1.55909e-07
Rgl3	127.217	1.2501	0.286724	4.35994	1.30098e-05	0.000116603
Tnik	88.0295	1.24936	0.327229	3.81799	0.000134541	0.000964
Accn4	9.10633	1.24881	0.376706	3.31507	0.000916211	0.00536031
Lhfpl2	155.216	1.24869	0.259838	4.80563	1.54261e-06	1.62829e-05
Capsl	129.762	1.24693	0.274346	4.54511	5.49056e-06	5.25699e-05
Abca9	10.5125	1.24646	0.375946	3.31554	0.000914679	0.00535342
Esyt1	502.833	1.24263	0.156014	7.96491	1.65343e-15	4.32547e-14
Six4	1099.39	1.23935	0.119236	10.3941	2.63869e-25	1.3019e-23
Emilin1	57.0216	1.23807	0.34542	3.58424	0.00033806	0.00222538
Mal2	1375.81	1.23666	0.114361	10.8136	2.967e-27	1.61659e-25
Tecrl	120.235	1.23544	0.306339	4.03291	5.50895e-05	0.000432129
Rbpms2	34.2975	1.23497	0.397157	3.10953	0.00187383	0.0100369
Slc43a2	428.227	1.23468	0.178822	6.90452	5.03732e-12	9.8452e-11
Myrip	116.974	1.2302	0.386759	3.18079	0.00146874	0.00811049
Apc2	76.7022	1.22788	0.330041	3.72038	0.000198927	0.00137335
Otx1	95.2221	1.22731	0.316927	3.87254	0.000107706	0.000791566
Ccdc114	75.6016	1.22717	0.322179	3.80898	0.000139542	0.000995127
A330076H08Rik	59.3432	1.22716	0.33206	3.69559	0.000219379	0.00150087
Apba1	32.7276	1.2258	0.403499	3.03792	0.00238215	0.0123485
Ankrd5	15.2053	1.22499	0.399087	3.06948	0.00214432	0.0112801
Rai14	7498.15	1.22144	0.167281	7.30173	2.84081e-13	6.27256e-12
Gm9899	8.26485	1.21909	0.375252	3.24871	0.00115929	0.00658902
Cpne2	54.3901	1.21695	0.334572	3.63734	0.000275464	0.00184052
Aldh1a2	25.9148	1.21571	0.398369	3.05171	0.00227544	0.0118685
Atp13a4	11.208	1.21378	0.382732	3.17137	0.00151719	0.00832869
Gpr162	10.7836	1.21301	0.392374	3.09146	0.00199178	0.0105635
Fam179a	13.3696	1.21296	0.39479	3.07242	0.00212327	0.0111787
Zfp536	31.6911	1.21274	0.404442	2.99856	0.00271259	0.0138202
Tekt1	138.316	1.21253	0.29444	4.11808	3.82048e-05	0.000310622
Mtnr1a	24.1816	1.21037	0.402911	3.00407	0.00266397	0.0135862
Ssbp2	746.559	1.20998	0.12686	9.5379	1.4576e-21	5.60363e-20
Trpm5	12.2462	1.20851	0.402087	3.00559	0.00265064	0.0135313
Mgat4c	17.128	1.20658	0.403465	2.99054	0.00278485	0.0141456
Cdh6	47.0609	1.20636	0.36257	3.32725	0.000877067	0.00515519
Ccdc74a	99.6171	1.20587	0.32397	3.72216	0.000197529	0.00136495
Gstt3	170.258	1.20438	0.303467	3.96874	7.22551e-05	0.000552751
Grpr	9.07643	1.20223	0.380135	3.16265	0.00156341	0.00854599
Gata3	152.426	1.20221	0.275798	4.35903	1.30639e-05	0.000117019
Cacna1i	10.8606	1.20203	0.372877	3.22366	0.00126565	0.00709503
Clcf1	17.831	1.20142	0.395604	3.03693	0.00239	0.012368
Cabp1	16.9438	1.20141	0.40361	2.97666	0.00291411	0.0147231
Mylk	132.911	1.2012	0.265545	4.52352	6.08202e-06	5.78308e-05
Nrcam	254.497	1.19891	0.258423	4.63934	3.49528e-06	3.45355e-05
Mamld1	175.833	1.19816	0.252806	4.73944	2.14311e-06	2.19484e-05
Mybpc1	13.2901	1.1971	0.375983	3.18393	0.0014529	0.00804056
Espn	680.927	1.19707	0.172841	6.92586	4.33319e-12	8.53508e-11
Slitrk5	147.398	1.19643	0.27317	4.37981	1.18784e-05	0.000107609
Tchh	60.2424	1.19571	0.34718	3.44406	0.00057305	0.0035342
Camkv	62.3209	1.19162	0.355485	3.3521	0.000802	0.00476201
Adamtsl3	23.0789	1.1916	0.404512	2.94577	0.0032215	0.0160729
Ptgs2	13.5795	1.1904	0.399687	2.97833	0.00289824	0.0146576
Astn2	68.2136	1.18863	0.367185	3.23713	0.00120737	0.00682391
1700003M02Rik	8.28887	1.18626	0.379208	3.12825	0.00175848	0.00947891
Lrguk	68.597	1.18585	0.325345	3.6449	0.000267497	0.00179362
Esr1	9.74388	1.18542	0.383064	3.09458	0.00197091	0.0104896
Lamb2	1877.37	1.18511	0.101503	11.6756	1.69775e-31	1.20168e-29
1700024P16Rik	8.36995	1.18276	0.372673	3.17372	0.00150498	0.00827439
Scrn1	48.2392	1.18269	0.361339	3.27307	0.00106387	0.00610164
Mal	15.8916	1.17662	0.4001	2.94081	0.00327358	0.0162948
Gm14207	8.23965	1.17661	0.37941	3.10116	0.00192766	0.0102883
Tmem132c	952.115	1.17274	0.28776	4.07543	4.59289e-05	0.000365957
Pkdcc	204.351	1.17185	0.214586	5.46099	4.73489e-08	6.1194e-07
Fam189a1	14.6683	1.17134	0.3998	2.92981	0.00339172	0.016822
Arhgap8	326.698	1.16782	0.188186	6.20567	5.44642e-10	8.75763e-09
Atg16l2	143.079	1.1667	0.305188	3.8229	0.000131889	0.000946788
Lipg	129.079	1.16463	0.279438	4.16777	3.07595e-05	0.000255016
Nab2	215.904	1.16129	0.253478	4.58143	4.61816e-06	4.48406e-05
Emb	898.812	1.16021	0.118386	9.80022	1.12335e-22	4.63634e-21
Boc	281.243	1.16019	0.194081	5.9779	2.26037e-09	3.41695e-08
Ankrd29	57.7646	1.15621	0.326504	3.54119	0.000398328	0.00257181
Nfib	3028.57	1.15562	0.0878401	13.156	1.57219e-39	1.52654e-37
Prss35	18.0325	1.15483	0.404519	2.85482	0.00430606	0.0206279
Larp6	25.0707	1.15483	0.404187	2.85716	0.00427454	0.0205153
Serpinb9	133.992	1.15439	0.290172	3.97831	6.94081e-05	0.000532586
Eya1	1189.68	1.15407	0.119077	9.69183	3.26637e-22	1.31235e-20
Cd47	408.937	1.15347	0.174477	6.61103	3.81665e-11	6.87406e-10
Snx22	76.162	1.15254	0.310686	3.70966	0.000207536	0.00142823
Ikzf4	131.494	1.15164	0.276084	4.17136	3.02793e-05	0.00025131
Hspa12a	122.277	1.15114	0.28557	4.03103	5.55332e-05	0.000435159
Bnc2	36.6833	1.14948	0.37585	3.05834	0.00222567	0.0116409
Sparcl1	20.3439	1.14924	0.404321	2.84239	0.00447765	0.0213465
Rnf125	12.9078	1.14794	0.401661	2.85798	0.00426346	0.0204687
Lrrcc1	1903.44	1.14616	0.103984	11.0224	2.97829e-28	1.72844e-26
Dlg4	525.137	1.1461	0.150054	7.63795	2.20716e-14	5.30665e-13
Il1r1	51.9047	1.14412	0.376376	3.03983	0.00236715	0.0122792
Cd97	20.2518	1.14346	0.404353	2.82788	0.00468573	0.0222089
Csf1	151.354	1.14258	0.281503	4.05884	4.93169e-05	0.00039008
Grin2c	13.7577	1.14218	0.392975	2.9065	0.00365494	0.0179337
Mdm1	1180.81	1.14083	0.118192	9.6524	4.80172e-22	1.899e-20
Rasa4	105.11	1.13878	0.2908	3.91602	9.00221e-05	0.000671707
Pgbd1	235.288	1.13792	0.201827	5.63809	1.71944e-08	2.33164e-07
Sorbs1	530.617	1.1369	0.153122	7.42481	1.12939e-13	2.57246e-12
Rph3al	112.016	1.13516	0.294394	3.85594	0.000115287	0.000838738
5330417C22Rik	70.802	1.13483	0.330126	3.43756	0.000586988	0.0036084
Ube2u	9.76537	1.13471	0.389666	2.91201	0.00359113	0.0176941
AI464131	148.184	1.13403	0.271079	4.18341	2.87173e-05	0.000240854
Garnl3	343.681	1.13369	0.168767	6.71746	1.84917e-11	3.41162e-10
Fam54b	806.005	1.13298	0.128029	8.84942	8.79765e-19	2.89063e-17
Gabra4	24.7905	1.13229	0.399405	2.83494	0.0045835	0.0217774
Clec2d	18.9189	1.13217	0.403402	2.80655	0.00500744	0.0235332
Tle2	718.482	1.13063	0.137241	8.23827	1.74724e-16	4.84783e-15
Usp44	102.895	1.13017	0.298004	3.79247	0.000149158	0.00105575
Abtb2	114.637	1.12766	0.262161	4.30139	1.69728e-05	0.000148863
Ptprj	766.315	1.12665	0.138542	8.13223	4.2145e-16	1.14999e-14
Lmna	222.477	1.12445	0.209187	5.37535	7.64359e-08	9.6723e-07
Fam159a	17.0134	1.12437	0.400687	2.80612	0.00501427	0.0235473
Pygl	604.591	1.12346	0.166954	6.72917	1.70639e-11	3.15974e-10
Hecw1	86.4257	1.11937	0.340934	3.28325	0.00102618	0.00591234
Ddc	287.172	1.11644	0.244297	4.57002	4.87674e-06	4.72906e-05
Sh3kbp1	413.281	1.11593	0.163879	6.80948	9.79514e-12	1.85459e-10
Pcnxl2	9.86959	1.11461	0.377648	2.95144	0.00316296	0.0158326
Gem	32.7114	1.11432	0.39725	2.80507	0.00503055	0.0236053
Ccdc46	424.92	1.11404	0.160803	6.92801	4.26796e-12	8.41755e-11
Pde8b	26.5402	1.1134	0.404523	2.75239	0.00591627	0.0270573
Rtkn2	713.956	1.11032	0.149472	7.42827	1.10028e-13	2.51556e-12
Rundc3b	183.766	1.10979	0.237873	4.66548	3.07896e-06	3.07429e-05
Tex15	104.226	1.10963	0.311409	3.56325	0.000366288	0.00239145
Sema3c	3582.29	1.10936	0.0896521	12.3741	3.61046e-35	3.0382e-33
Efemp1	17.085	1.10872	0.404462	2.74123	0.00612097	0.0278924
Dcdc2a	55.4449	1.10819	0.352886	3.14036	0.00168741	0.00915758
Wdr86	505.976	1.1079	0.14939	7.41613	1.20595e-13	2.73862e-12
Gm14873	10.5618	1.10785	0.387388	2.85978	0.00423929	0.020372
Peli3	17.5614	1.10445	0.404394	2.73111	0.0063121	0.0285999
Rbm24	51.1915	1.10201	0.380819	2.89379	0.00380628	0.01858
BC006779	265.088	1.10135	0.218632	5.03745	4.71777e-07	5.37294e-06
Ube2ql1	30.9873	1.10114	0.387849	2.8391	0.00452406	0.0215355
Sytl5	87.3854	1.0998	0.34364	3.20045	0.00137214	0.0076243
Msx2	34.516	1.09881	0.387661	2.83447	0.00459015	0.0218021
Cdyl2	132.483	1.09831	0.293032	3.7481	0.000178177	0.00124428
Atp10b	22.6495	1.09676	0.403149	2.72049	0.00651845	0.0293803
Shisa4	132.673	1.09648	0.28586	3.83574	0.000125188	0.00090555
Ccdc37	20.7071	1.09575	0.40256	2.72196	0.00648956	0.0292726
Setbp1	1761.1	1.09507	0.102819	10.6505	1.73481e-26	8.99905e-25
L1cam	25.1646	1.09413	0.402185	2.72045	0.00651926	0.0293803
Zfp810	279.549	1.09309	0.19402	5.63393	1.76144e-08	2.38007e-07
Agtr1a	17.121	1.09299	0.40124	2.72404	0.0064489	0.0291065
B3gnt5	917.442	1.09282	0.127301	8.58454	9.12034e-18	2.84836e-16
Dusp18	256.488	1.0928	0.222319	4.91544	8.85849e-07	9.66015e-06
1110012J17Rik	861.805	1.09091	0.116945	9.32834	1.07545e-20	3.88779e-19
Cdh22	9.63392	1.0884	0.3649	2.98273	0.00285685	0.0144773
Car12	54.195	1.0845	0.345309	3.14067	0.00168563	0.00915137
Shisa6	10.3343	1.08387	0.364281	2.97538	0.00292623	0.0147745
Shisa7	375.451	1.0837	0.206709	5.24263	1.58307e-07	1.91983e-06
AI467606	28.7381	1.08335	0.404249	2.67991	0.00736421	0.0325586
Cacng4	70.9771	1.08302	0.316713	3.41954	0.00062727	0.00382498
Pde7b	11.5998	1.08196	0.397953	2.71882	0.00655151	0.0294906
Gatsl2	320.328	1.08141	0.190267	5.68362	1.31876e-08	1.80772e-07
Jazf1	59.5708	1.08034	0.332659	3.24759	0.00116388	0.00661016
Epb4.1l1	913.207	1.0788	0.117717	9.16437	4.98366e-20	1.75552e-18
Ssfa2	1227.03	1.07858	0.123828	8.71024	3.03244e-18	9.73142e-17
Heph	743.981	1.07847	0.128011	8.42485	3.61224e-17	1.05423e-15
Ednrb	81.4093	1.07841	0.30541	3.531	0.000413989	0.00266271
Ptpla	85.6971	1.0775	0.32677	3.29743	0.000975753	0.0056519
Lox	28.8067	1.07663	0.394866	2.72657	0.00639957	0.0289356
Tubb4a	1021.88	1.07389	0.162439	6.61104	3.8162e-11	6.87406e-10
Kcna3	15.6744	1.0732	0.40385	2.65742	0.00787423	0.0344316
Armcx3	619.185	1.07301	0.13212	8.12144	4.60687e-16	1.24831e-14
Rimkla	167.795	1.07036	0.250968	4.26492	1.9997e-05	0.000172984
4921506M07Rik	1116.76	1.06973	0.131699	8.12249	4.56704e-16	1.23973e-14
Nap1l5	12.4684	1.06954	0.391656	2.73083	0.00631754	0.0286074
Tspan1	18.2347	1.06914	0.404259	2.64469	0.00817663	0.0355079
Igsf21	11.3395	1.06908	0.382108	2.79786	0.00514428	0.0240641
C1ql1	107.693	1.06783	0.276568	3.86102	0.000112916	0.000823866
Rgag4	957.036	1.06639	0.110292	9.66884	4.08987e-22	1.62171e-20
Matn2	27.5627	1.06628	0.402711	2.64775	0.0081029	0.0352483
Nrg1	51.9288	1.06625	0.380641	2.80119	0.0050914	0.0238391
Mab21l2	7.08984	1.06624	0.36442	2.92587	0.00343499	0.0169921
Kif5a	216.162	1.06591	0.237773	4.48287	7.3646e-06	6.8978e-05
Cap2	86.0669	1.06528	0.324568	3.28214	0.00103022	0.00592885
Nup62cl	7.66378	1.06437	0.370848	2.87011	0.0041033	0.0198033
Sypl2	29.2677	1.06307	0.388837	2.73397	0.00625765	0.0284212
Fat3	1179.87	1.06192	0.147764	7.18656	6.64425e-13	1.43567e-11
Mrc2	945.347	1.05795	0.135692	7.7967	6.35449e-15	1.59621e-13
Gramd1b	136.759	1.05745	0.286294	3.69357	0.000221129	0.00151216
Tmem8	130.241	1.05662	0.283715	3.72425	0.000195898	0.00135677
Mpped1	10.4805	1.05644	0.393051	2.6878	0.00719245	0.031939
Ptprv	8.29411	1.05328	0.369965	2.84698	0.00441361	0.0210893
Arntl2	21.5303	1.0502	0.404378	2.59706	0.00940246	0.0397596
Tnni3	45.4002	1.04962	0.364947	2.87609	0.0040263	0.0195157
Rab17	35.8398	1.0488	0.376145	2.78829	0.00529877	0.0246879
Aqp1	8.88255	1.04819	0.375521	2.79131	0.00524954	0.0244829
Nat8l	165.775	1.04705	0.231534	4.52225	6.11859e-06	5.81055e-05
A730020E08Rik	33.9411	1.04561	0.377135	2.77251	0.00556249	0.0257032
Gm20362	12.486	1.04416	0.400695	2.60588	0.00916383	0.0389382
Mecom	4048.56	1.04269	0.0882768	11.8117	3.39818e-32	2.45106e-30
A230057D06Rik	47.4153	1.04174	0.354097	2.94195	0.0032615	0.0162441
Fam84b	1214.39	1.04035	0.102154	10.1842	2.33387e-24	1.06801e-22
Ppapdc3	25.3733	1.03965	0.403444	2.57693	0.00996821	0.041698
Scgn	7.96331	1.03965	0.361605	2.87509	0.00403914	0.0195591
Prune2	106.117	1.03878	0.315122	3.29644	0.000979172	0.00566353
Rnf112	9.32184	1.03727	0.394474	2.62951	0.00855079	0.0368349
Mstn	8.06945	1.037	0.361311	2.87011	0.00410335	0.0198033
Nol4	83.8678	1.03686	0.305389	3.39522	0.000685735	0.00414479
D730039F16Rik	14.3044	1.03672	0.391458	2.64835	0.00808863	0.0351963
Scn2a1	39.461	1.03621	0.39039	2.6543	0.00794724	0.0346907
Col5a2	361.905	1.03613	0.181004	5.72435	1.03831e-08	1.44288e-07
Sall1	1136.66	1.03594	0.258016	4.01503	5.94376e-05	0.000462642
1700040L02Rik	22.3558	1.03397	0.401338	2.57631	0.00998599	0.0417609
Tle6	52.494	1.03377	0.335002	3.08587	0.00202956	0.0107413
Tom1l2	512.287	1.03244	0.154662	6.67545	2.46472e-11	4.48715e-10
Faah	295.671	1.03157	0.19512	5.28681	1.24465e-07	1.53523e-06
Atp1a2	51.952	1.027	0.360617	2.84789	0.00440099	0.0210356
Kcnf1	19.6263	1.02627	0.404134	2.53943	0.0111032	0.045726
Wt1	7.35952	1.02626	0.36077	2.84464	0.00444622	0.0212317
Pea15a	848.854	1.02625	0.152971	6.70885	1.96169e-11	3.60167e-10
Dnahc7b	139.575	1.02538	0.282295	3.6323	0.000280909	0.00187442
Fam123a	346.841	1.023	0.20659	4.95183	7.3517e-07	8.08101e-06
Vim	1689.08	1.02263	0.22486	4.54785	5.41959e-06	5.1956e-05
Bche	115.703	1.02151	0.261622	3.90452	9.44129e-05	0.000701704
Ppfibp1	3477.07	1.02098	0.0907363	11.2521	2.26057e-29	1.4267e-27
Rnd1	14.7849	1.01994	0.403536	2.52752	0.0114873	0.0469701
Anxa6	1021.2	1.0198	0.110025	9.26876	1.88317e-20	6.75934e-19
Nrk	355.777	1.01746	0.165711	6.13995	8.25472e-10	1.30652e-08
Rnf135	67.6346	1.01696	0.31917	3.18628	0.00144115	0.00798337
Myo1h	45.6217	1.01669	0.368544	2.75867	0.00580369	0.0266147
Psmd5	789.752	1.01635	0.148661	6.83675	8.1009e-12	1.55125e-10
Bmpr1b	858.081	1.01559	0.131037	7.75042	9.15912e-15	2.28933e-13
Rasl11b	624.238	1.01558	0.143377	7.08331	1.40755e-12	2.90861e-11
Ppp1r14c	44.3173	1.01524	0.357499	2.83985	0.00451345	0.0214918
2610316D01Rik	115.303	1.01456	0.287412	3.52999	0.00041557	0.00267126
Pias1	1055.29	1.01398	0.110573	9.17028	4.71782e-20	1.66965e-18
Adamts9	291.586	1.00982	0.179683	5.62	1.90959e-08	2.5665e-07
Ribc2	10.0099	1.0094	0.38476	2.62346	0.00870425	0.0373494
AW549542	12.5577	1.00732	0.398201	2.52968	0.0114167	0.046739
Cntln	996.348	1.0056	0.118787	8.46553	2.54983e-17	7.52872e-16
Anxa9	15.7451	1.00547	0.398101	2.52566	0.0115481	0.0471224
Slc7a4	45.1249	1.0052	0.370868	2.71038	0.00672055	0.030144
Syt5	330.712	1.00376	0.217339	4.61839	3.8672e-06	3.8012e-05
Abcc5	1419.84	1.002	0.0941749	10.6397	1.94652e-26	1.00628e-24
Basp1	2102.78	0.998864	0.109158	9.15066	5.6589e-20	1.98415e-18
Tbx2	159.332	0.995783	0.383904	2.59383	0.00949133	0.0400015
Airn	177.303	0.994219	0.22586	4.40193	1.07292e-05	9.76541e-05
Oplah	173.962	0.991415	0.250987	3.95007	7.81281e-05	0.000592592
Col25a1	231.856	0.990459	0.246473	4.01854	5.85603e-05	0.000456283
Tmod2	464.403	0.989824	0.165223	5.99082	2.08791e-09	3.17526e-08
Eif4e3	279.264	0.989737	0.206859	4.7846	1.7133e-06	1.79222e-05
Itpka	93.2396	0.987882	0.30768	3.21074	0.00132393	0.00737803
Fign	556.212	0.987141	0.166277	5.93671	2.90806e-09	4.34627e-08
Gm1568	30.368	0.986631	0.380751	2.59127	0.00956216	0.0402663
Prrt2	219.404	0.986283	0.21609	4.56423	5.01339e-06	4.83989e-05
Mfap5	9.00152	0.985407	0.376284	2.61878	0.00882438	0.0377792
Chrdl1	118.348	0.98417	0.322582	3.05091	0.00228147	0.0118918
Per2	714.755	0.983237	0.157519	6.24203	4.31936e-10	7.03498e-09
Phf21b	428.227	0.982072	0.182812	5.37202	7.78572e-08	9.83573e-07
Vdr	12.7651	0.98091	0.387367	2.53225	0.0113332	0.0464838
Adamts10	919.295	0.98053	0.117461	8.34769	6.9612e-17	1.98571e-15
BC060267	61.5813	0.980173	0.369609	2.65192	0.00800362	0.0348765
Pawr	2050.05	0.978719	0.101139	9.67696	3.77772e-22	1.50979e-20
Sema4f	140.648	0.978693	0.250139	3.91259	9.13099e-05	0.000680645
Lrrtm3	9.39411	0.978199	0.385484	2.53759	0.011162	0.0459324
Scn4a	7.80849	0.977623	0.369779	2.6438	0.008198	0.0355905
Stk32a	41.8726	0.977148	0.37578	2.60032	0.00931369	0.0394724
Ncoa7	603.235	0.974743	0.158611	6.1455	7.97099e-10	1.26824e-08
Fblim1	1229.93	0.97282	0.108472	8.96838	3.00916e-19	1.02197e-17
F930015N05Rik	7.98128	0.97133	0.376791	2.5779	0.00994014	0.0416151
Ryr3	127.267	0.97132	0.259618	3.74134	0.000183043	0.0012765
Galnt3	325.009	0.969904	0.202515	4.78929	1.67374e-06	1.75326e-05
Cgn	1897.55	0.969311	0.0885252	10.9496	6.67815e-28	3.84616e-26
Dab1	134.071	0.969236	0.256491	3.77882	0.00015757	0.00110907
Trps1	1183.8	0.969168	0.109498	8.85098	8.67527e-19	2.86284e-17
Smarcd3	897.947	0.968831	0.120176	8.06178	7.51926e-16	2.00872e-14
Dnalc1	388.096	0.968015	0.180024	5.37714	7.56798e-08	9.58463e-07
Lmo2	65.0041	0.968005	0.362367	2.67134	0.00755487	0.033227
Med12l	1129.24	0.96771	0.142083	6.81088	9.70028e-12	1.84123e-10
Egfem1	8.51877	0.967656	0.36911	2.62159	0.00875204	0.0375332
Col22a1	274.488	0.965611	0.25478	3.78998	0.000150662	0.0010654
Sall3	7.63336	0.965495	0.368951	2.61687	0.00887405	0.0379811
Iqcg	49.7199	0.965125	0.35883	2.68965	0.00715277	0.0317814
Fgf11	40.8162	0.963755	0.371338	2.59536	0.00944929	0.039902
Nipa1	188.167	0.962006	0.22994	4.18372	2.86776e-05	0.000240653
Ccdc141	143.426	0.961588	0.259448	3.70629	0.000210317	0.0014454
Astn1	275.84	0.961408	0.230951	4.16282	3.1434e-05	0.000259897
Trim63	6.7693	0.959285	0.362927	2.64319	0.00821292	0.0356348
Sulf2	1174.4	0.959025	0.140997	6.80174	1.03365e-11	1.94977e-10
Spsb4	199.477	0.957967	0.235091	4.07487	4.60397e-05	0.000366648
Ppp3ca	831.454	0.957535	0.113854	8.41017	4.09414e-17	1.18573e-15
Cpt1c	105.221	0.956585	0.266765	3.58588	0.00033595	0.00221438
Kcns1	39.3686	0.956571	0.371184	2.57708	0.00996387	0.0416914
Naalad2	6.67277	0.95655	0.354589	2.69763	0.00698343	0.0311478
Peg12	537.024	0.954741	0.16868	5.66007	1.51309e-08	2.05734e-07
Pkp2	510.998	0.953926	0.180531	5.28401	1.26385e-07	1.55765e-06
Zfp85-rs1	77.0202	0.953493	0.307721	3.09856	0.0019446	0.0103714
Ephb6	307.608	0.95268	0.171815	5.54481	2.94281e-08	3.86444e-07
Tmtc2	144.265	0.952476	0.277027	3.43821	0.00058557	0.00360255
Lepr	161.355	0.952251	0.230824	4.12544	3.70024e-05	0.000301818
Slco3a1	81.2734	0.952118	0.312457	3.0472	0.00230983	0.0120153
Ddo	159.899	0.952	0.248964	3.82385	0.000131382	0.000944491
Dnahc6	9.13093	0.95107	0.376296	2.52745	0.0114893	0.0469701
1700020D05Rik	7.50514	0.945466	0.367701	2.57129	0.0101319	0.0423128
Zfp9	234.405	0.945153	0.263372	3.58866	0.000332379	0.00219558
Fhod1	397.697	0.944519	0.165869	5.69435	1.23841e-08	1.70684e-07
Gpr37	160.831	0.942722	0.231265	4.07638	4.57428e-05	0.000364858
Nfat5	3237.46	0.942648	0.088827	10.6122	2.616e-26	1.33867e-24
Pax1	92.8146	0.94215	0.365422	2.57825	0.0099301	0.0415845
Anxa5	800.672	0.942124	0.122518	7.68967	1.47515e-14	3.62728e-13
Sytl2	227.03	0.941475	0.200944	4.68525	2.79612e-06	2.80482e-05
Bmf	1271.49	0.939067	0.108941	8.61996	6.69767e-18	2.1004e-16
Angptl2	630.821	0.939005	0.143178	6.55832	5.44171e-11	9.65171e-10
Eml6	67.0404	0.938746	0.342656	2.73962	0.00615107	0.0280043
Car13	98.9929	0.938717	0.282249	3.32584	0.000881523	0.00517937
Tmie	37.1062	0.937659	0.369937	2.53465	0.0112561	0.0462549
Cpe	721.908	0.936232	0.124206	7.53776	4.78127e-14	1.12631e-12
Hip1	2892.13	0.935736	0.100491	9.31166	1.25852e-20	4.53876e-19
Zfp287	291.175	0.934695	0.195118	4.79042	1.66433e-06	1.74582e-05
Frem1	111.375	0.931983	0.288158	3.23427	0.00121952	0.00688228
Zbtb4	311.84	0.931198	0.186567	4.99122	5.99983e-07	6.68723e-06
Fgd2	191.559	0.931109	0.25441	3.65987	0.000252344	0.00170029
Chn1	578.627	0.930627	0.145161	6.41101	1.4456e-10	2.46582e-09
Hsd17b11	154.139	0.929824	0.243011	3.82625	0.000130108	0.00093667
Klhl5	376.331	0.929807	0.215521	4.31423	1.60162e-05	0.000140881
Tnfrsf21	506.372	0.926904	0.145901	6.35297	2.11195e-10	3.54653e-09
Cmpk2	90.4025	0.926416	0.290941	3.1842	0.00145154	0.00803598
Tspyl4	289.041	0.925545	0.189513	4.88382	1.04052e-06	1.12577e-05
Fzd5	517.943	0.925278	0.204721	4.5197	6.19282e-06	5.86633e-05
Zbtb46	233.304	0.924025	0.249332	3.706	0.000210555	0.00144638
Grin2a	6.66221	0.923185	0.35118	2.6288	0.00856856	0.0368823
Syt7	756.325	0.922829	0.156189	5.90841	3.45427e-09	5.10955e-08
Gbp8	6.07998	0.922196	0.351466	2.62385	0.00869409	0.0373163
Cxcl15	66.1261	0.919485	0.337409	2.72513	0.00642755	0.0290361
Fam184a	545.28	0.91934	0.171113	5.37272	7.75599e-08	9.80634e-07
2810047C21Rik1	37.836	0.919013	0.36383	2.52594	0.011539	0.0470982
Tmem26	68.8437	0.917703	0.346678	2.64714	0.00811766	0.0352922
Agtrap	219.688	0.917171	0.229675	3.99334	6.51487e-05	0.000502704
Phlpp1	525.148	0.916757	0.144366	6.35023	2.14995e-10	3.60635e-09
Wnt4	652.24	0.916018	0.165687	5.52858	3.22825e-08	4.22265e-07
Acsl1	565.456	0.915192	0.183114	4.99794	5.79451e-07	6.47745e-06
Myom3	6.28228	0.914697	0.350516	2.60957	0.00906547	0.0386367
Syt13	125.013	0.913169	0.318477	2.8673	0.00413996	0.0199516
Srcrb4d	70.9757	0.912642	0.317629	2.8733	0.00406213	0.0196453
Gm19705	7.29773	0.911487	0.36442	2.5012	0.0123774	0.0498091
Dnajc22	54.6736	0.911437	0.346088	2.63354	0.00845002	0.0364755
St3gal5	1016.91	0.910989	0.125187	7.27702	3.41283e-13	7.48107e-12
Adam22	346.003	0.9098	0.183543	4.95689	7.16318e-07	7.89096e-06
Hoxb7	6.94773	0.908283	0.349449	2.59918	0.00934454	0.039581
Gde1	858.079	0.906628	0.125999	7.19553	6.22178e-13	1.35016e-11
Plxna2	534.711	0.906431	0.188764	4.80193	1.57145e-06	1.65642e-05
Pla2g4a	196.726	0.905017	0.240657	3.76061	0.000169498	0.00118668
Prkd1	502.704	0.904745	0.15326	5.90333	3.5624e-09	5.24899e-08
Pik3ip1	248.405	0.904625	0.203832	4.4381	9.07576e-06	8.38235e-05
Rit1	264.351	0.903957	0.199482	4.53153	5.85579e-06	5.58901e-05
Mapre3	225.997	0.903162	0.221353	4.08019	4.49984e-05	0.000359678
Ccdc159	52.1819	0.901147	0.359983	2.5033	0.012304	0.0495886
Stim2	1022.36	0.900166	0.113694	7.91746	2.42414e-15	6.25528e-14
Shroom4	895.056	0.89942	0.151334	5.94327	2.79393e-09	4.18591e-08
Crem	140.05	0.898395	0.237741	3.77888	0.000157533	0.00110907
Npr2	79.9392	0.898235	0.324236	2.77031	0.00560026	0.0258619
Tmem37	6.23525	0.898188	0.357408	2.51306	0.0119689	0.0485261
Npc2	1434.91	0.897231	0.105348	8.5168	1.64016e-17	4.95879e-16
Tmem170b	601.646	0.893955	0.171224	5.22097	1.77987e-07	2.14136e-06
Cables1	228.7	0.893739	0.235056	3.80224	0.000143394	0.00101971
Shb	326.464	0.89293	0.187943	4.75107	2.02345e-06	2.08037e-05
Vgll2	6.82955	0.892404	0.347755	2.56619	0.0102822	0.0428576
Fos	667.724	0.891936	0.168276	5.30042	1.15534e-07	1.43207e-06
1190002N15Rik	1027.55	0.889169	0.117441	7.5712	3.69777e-14	8.73793e-13
Cep170	1886.74	0.888922	0.0963825	9.22286	2.89277e-20	1.03098e-18
Apbb1	943.652	0.887733	0.124336	7.13978	9.34816e-13	1.98593e-11
Crispld1	189.776	0.886833	0.232763	3.81002	0.000138957	0.000991884
Prtg	356.767	0.886374	0.214805	4.12642	3.68461e-05	0.000300705
Csrp1	484.226	0.885213	0.15181	5.83106	5.50763e-09	7.95166e-08
Rbpjl	6.1343	0.883926	0.347254	2.54548	0.0109129	0.045077
Slc12a5	126.91	0.881393	0.250574	3.51749	0.000435651	0.00277844
Zfp449	253.168	0.880076	0.222379	3.95755	7.57219e-05	0.000576072
Ccdc39	106.957	0.879363	0.331919	2.64933	0.00806508	0.035104
Stmn2	42.7699	0.87842	0.345533	2.54222	0.0110152	0.0454377
Fkbp14	134.748	0.877038	0.277241	3.16345	0.00155912	0.00852873
Col9a3	124.8	0.876027	0.285343	3.07008	0.00214	0.0112629
Htra3	5.94875	0.872276	0.346105	2.52026	0.0117267	0.0476974
Mxd4	872.172	0.872161	0.127893	6.81947	9.138e-12	1.73886e-10
Htr7	5.86566	0.87215	0.34617	2.51942	0.0117547	0.0477599
Slco2a1	217.542	0.870148	0.302459	2.87691	0.00401591	0.0194777
Dera	552.298	0.868747	0.152257	5.7058	1.15798e-08	1.59889e-07
Ulk2	718.848	0.86871	0.134194	6.47356	9.57231e-11	1.65705e-09
Sdk2	236.469	0.865645	0.234127	3.69734	0.000217873	0.00149124
Mvp	60.2653	0.864351	0.331503	2.60737	0.00912403	0.0388098
Fam135b	5.66703	0.863445	0.345297	2.50059	0.0123988	0.0498682
Hdac5	1355.26	0.860372	0.111807	7.69519	1.41286e-14	3.48543e-13
Spock2	558.138	0.858636	0.169918	5.05325	4.34366e-07	4.96929e-06
6030429G01Rik	181.538	0.857666	0.241649	3.54922	0.000386372	0.00250637
Klf12	1063.21	0.85575	0.137661	6.21633	5.08911e-10	8.20924e-09
Map3k15	185.402	0.855676	0.252063	3.3947	0.000687045	0.00415105
Atxn10	3505.92	0.855657	0.0772815	11.0719	1.71616e-28	1.0194e-26
1700001L05Rik	568.658	0.853868	0.14845	5.75191	8.82423e-09	1.23875e-07
Lin28b	272.573	0.853854	0.193653	4.40921	1.03749e-05	9.48223e-05
Mme	211.535	0.851171	0.220129	3.8667	0.000110319	0.00080725
Kcnj2	70.1005	0.850306	0.306245	2.77656	0.0054938	0.0254401
Gm12824	152.387	0.848403	0.241356	3.51515	0.000439501	0.00279829
Cecr6	119.691	0.846608	0.289165	2.92777	0.00341405	0.0169272
Nt5dc3	162.618	0.84454	0.235739	3.58253	0.000340287	0.00223809
Pbx3	648.417	0.844081	0.125035	6.75076	1.47073e-11	2.72671e-10
Rhpn1	253.567	0.841172	0.194865	4.3167	1.58382e-05	0.000139477
Pld2	335.666	0.841005	0.195623	4.29911	1.71482e-05	0.000150315
Ddx26b	938.691	0.84052	0.112051	7.50126	6.32079e-14	1.47748e-12
Eif5a2	205.587	0.839715	0.271622	3.09149	0.00199157	0.0105635
Zfp608	5244.73	0.839358	0.0646993	12.9732	1.736e-38	1.6132e-36
Ccm2	365.382	0.839342	0.186253	4.50645	6.59211e-06	6.20962e-05
Iffo2	557.948	0.8382	0.149166	5.61923	1.91812e-08	2.57569e-07
Fam126a	564.428	0.833316	0.187793	4.43742	9.1045e-06	8.39865e-05
Ccdc8	2554.11	0.832977	0.078802	10.5705	4.08283e-26	2.06832e-24
Rimklb	1654.6	0.832825	0.0970796	8.57878	9.58807e-18	2.98828e-16
Loxl1	308.295	0.831314	0.260725	3.18846	0.00143032	0.0079272
Ryr2	641.085	0.830535	0.175939	4.72058	2.35176e-06	2.38914e-05
Rassf8	415.284	0.829735	0.163493	5.07505	3.874e-07	4.45555e-06
Sorbs2	597.589	0.829479	0.166944	4.96861	6.74336e-07	7.46104e-06
Ccdc104	1245.45	0.828577	0.117338	7.06144	1.64792e-12	3.39144e-11
Tram1l1	93.0582	0.828437	0.288013	2.87639	0.00402255	0.0195037
Diras2	140.197	0.827704	0.29628	2.79366	0.0052116	0.0243192
Aff1	457.478	0.825245	0.181147	4.55567	5.22191e-06	5.02518e-05
Gpx3	128.383	0.824935	0.264133	3.12318	0.00178909	0.00963226
Nckap5	140.497	0.823598	0.255941	3.21792	0.00129123	0.00722774
Magel2	74.7114	0.823005	0.315359	2.60974	0.00906103	0.0386367
Pitpnm1	318.449	0.818403	0.195004	4.19684	2.70664e-05	0.000228398
Slc39a14	244.154	0.817037	0.198624	4.11348	3.8974e-05	0.00031626
Adck4	566.124	0.814062	0.146114	5.57143	2.52655e-08	3.3365e-07
Icam1	393.753	0.813793	0.17192	4.73355	2.20632e-06	2.25197e-05
Ager	79.0278	0.813577	0.30132	2.70005	0.00693298	0.0309593
AK129341	210.804	0.811197	0.205858	3.94056	8.12917e-05	0.000612295
Emilin3	110.089	0.808977	0.284739	2.84112	0.0044955	0.021413
Rmst	91.7796	0.808551	0.306356	2.63925	0.00830887	0.0359584
0610010O12Rik	93.2147	0.807873	0.301301	2.68128	0.00733409	0.0324349
Acadvl	294.487	0.805455	0.192997	4.17341	3.00074e-05	0.000249327
Zmym3	1063.65	0.803238	0.106534	7.53976	4.7084e-14	1.11087e-12
Cdon	1269.15	0.802504	0.100789	7.9622	1.69004e-15	4.41363e-14
Tsga10	86.2005	0.801832	0.302961	2.64665	0.00812941	0.0353332
Gli2	192.932	0.800495	0.263561	3.03723	0.0023876	0.0123608
Ndn	936.607	0.800177	0.116462	6.87068	6.38942e-12	1.22974e-10
Fstl1	8772.05	0.798098	0.0679494	11.7455	7.44968e-32	5.34788e-30
Ttyh1	128.013	0.796812	0.256314	3.10873	0.00187893	0.0100601
Rock1	5613.23	0.796767	0.0652332	12.2141	2.61266e-34	2.07193e-32
Stxbp1	100.676	0.796347	0.277676	2.8679	0.00413202	0.0199261
Zfp54	76.9156	0.795676	0.304969	2.60904	0.00907971	0.0386756
Dnpep	1034.79	0.793372	0.117218	6.76832	1.30283e-11	2.43028e-10
Myof	855.848	0.792901	0.151876	5.2207	1.78246e-07	2.14277e-06
Oxr1	1778.15	0.791652	0.0925576	8.55308	1.19851e-17	3.67487e-16
Nalcn	351.976	0.790293	0.188	4.20369	2.62601e-05	0.000222089
Cep110	4375.98	0.789775	0.0713292	11.0723	1.71028e-28	1.0194e-26
Nap1l3	93.4004	0.788809	0.294025	2.6828	0.00730092	0.0323259
Hsd11b2	431.9	0.788708	0.167442	4.71034	2.47299e-06	2.49975e-05
Vash2	1030.4	0.788339	0.105464	7.47496	7.72296e-14	1.78868e-12
Rilpl2	210.845	0.78584	0.241171	3.25843	0.00112031	0.00639143
Chpt1	226.196	0.785716	0.232092	3.38536	0.000710843	0.00428628
Flnc	135.994	0.785348	0.276679	2.83848	0.00453294	0.021571
Klf7	96.5311	0.7848	0.275391	2.84977	0.00437509	0.0209316
Gm5595	276.312	0.784785	0.192124	4.08478	4.41179e-05	0.000353386
A930024E05Rik	84.4189	0.783782	0.308871	2.53757	0.0111624	0.0459324
Shc2	308.673	0.783003	0.185972	4.21033	2.54997e-05	0.000216262
Stx2	482.07	0.780488	0.167439	4.66133	3.14176e-06	3.12875e-05
Fermt2	1900.22	0.78038	0.092591	8.42825	3.50879e-17	1.02602e-15
Igdcc4	594.463	0.779896	0.142212	5.48404	4.1573e-08	5.38671e-07
Mospd2	230.762	0.779818	0.21372	3.64878	0.000263491	0.00176832
Pcdh18	696.815	0.778674	0.133635	5.82689	5.64708e-09	8.11539e-08
Rgnef	925.513	0.778508	0.121428	6.41125	1.44327e-10	2.46462e-09
2810021J22Rik	267.272	0.777554	0.191056	4.06977	4.70585e-05	0.000373582
Arrdc1	584.253	0.777504	0.177915	4.37007	1.24205e-05	0.000111984
Rhob	755.323	0.776464	0.126433	6.14133	8.18337e-10	1.29663e-08
Nr6a1	227.418	0.773045	0.206877	3.73674	0.000186421	0.00129648
Zfp788	282.766	0.772726	0.18492	4.1787	2.93178e-05	0.000244915
Casp7	217.927	0.772194	0.240452	3.21143	0.00132077	0.00736314
C630004H02Rik	196.094	0.77197	0.244053	3.16312	0.00156087	0.0085352
Id4	448.996	0.770831	0.192227	4.00999	6.07206e-05	0.000472385
Fbxo41	178.08	0.769367	0.230954	3.33126	0.000864537	0.00509142
Nr4a1	222.824	0.76895	0.232225	3.31123	0.000928856	0.00541568
Reck	311.881	0.768536	0.231352	3.32193	0.000893974	0.00524439
Itm2c	818.843	0.767869	0.12772	6.01212	1.83117e-09	2.79603e-08
Cacnb3	2124.63	0.76658	0.100371	7.63746	2.2154e-14	5.31802e-13
1110028C15Rik	518.931	0.765266	0.151553	5.0495	4.42962e-07	5.0638e-06
Ap1m1	753.826	0.764506	0.131145	5.82949	5.55972e-09	7.99744e-08
Dlc1	249.665	0.762018	0.230555	3.30515	0.000949254	0.00552164
Evi5	1554.39	0.761347	0.0963629	7.90083	2.77043e-15	7.11248e-14
B230118H07Rik	228.429	0.761051	0.227009	3.35251	0.00080082	0.00475874
Pygb	2275.97	0.760618	0.0990826	7.67661	1.63351e-14	3.99076e-13
Ank2	1001.33	0.760525	0.116931	6.50406	7.81793e-11	1.36426e-09
Rgs9	758.062	0.758043	0.144575	5.24324	1.57776e-07	1.91493e-06
Xpr1	878.224	0.756201	0.130747	5.78369	7.30803e-09	1.03647e-07
Zhx1	1173.93	0.754433	0.101567	7.42797	1.10275e-13	2.51556e-12
Lrpap1	1228.49	0.754218	0.103175	7.31009	2.66971e-13	5.91201e-12
Elmo2	1730.18	0.753981	0.0983851	7.66357	1.80838e-14	4.3837e-13
Adam9	574.814	0.753149	0.154356	4.87929	1.06468e-06	1.15026e-05
Crabp2	864.349	0.751409	0.155067	4.84569	1.26172e-06	1.34586e-05
Nudt18	113.738	0.750169	0.271377	2.76431	0.00570435	0.0262785
BC031353	561.038	0.750151	0.139941	5.36048	8.29988e-08	1.04504e-06
Nfkbiz	701.686	0.749749	0.164643	4.55379	5.26888e-06	5.06394e-05
Camkk1	181.727	0.748868	0.232998	3.21406	0.00130874	0.00730956
Plcl2	387.34	0.748378	0.175524	4.26368	2.01091e-05	0.000173854
Ogfrl1	415.528	0.747538	0.158974	4.70225	2.57306e-06	2.59309e-05
Frmd5	600.419	0.746661	0.141847	5.26384	1.4108e-07	1.72473e-06
Frat1	120.059	0.74585	0.256092	2.91243	0.00358632	0.0176783
Aplp1	358.035	0.744848	0.19672	3.78633	0.000152887	0.00107877
Oaz2-ps	1006.63	0.744533	0.12487	5.96248	2.4844e-09	3.73325e-08
Usp29	193.797	0.743697	0.209958	3.54212	0.000396929	0.00256606
Mn1	668.424	0.743696	0.16168	4.5998	4.22905e-06	4.1354e-05
E330009J07Rik	554.235	0.743191	0.164389	4.52093	6.15698e-06	5.83603e-05
Rhoc	242.979	0.742867	0.228336	3.25339	0.00114035	0.00648867
Ptpn21	1205.06	0.741414	0.126489	5.86152	4.58653e-09	6.68644e-08
Arhgap33	566.586	0.738947	0.145582	5.07582	3.85829e-07	4.44084e-06
Cited2	1062.87	0.738733	0.145174	5.08861	3.60706e-07	4.15838e-06
Jam3	509.741	0.738084	0.147741	4.99581	5.8589e-07	6.5446e-06
Ypel2	291.906	0.73789	0.193633	3.81077	0.000138533	0.000989322
Wdfy1	1077.48	0.737811	0.106117	6.95283	3.58033e-12	7.13569e-11
Acot2	128.414	0.737532	0.267201	2.76021	0.00577645	0.02653
Gpr173	132.07	0.737085	0.273485	2.69515	0.00703566	0.0313162
Apbb2	1676.22	0.734332	0.0982734	7.47234	7.87824e-14	1.82186e-12
Mras	263.346	0.733416	0.202133	3.62839	0.000285197	0.00190219
Fbxl7	323.784	0.733357	0.201537	3.63882	0.000273894	0.00183165
Kifc2	135.401	0.732094	0.262024	2.794	0.00520608	0.0243138
Galk1	1635.06	0.731619	0.101962	7.17539	7.20994e-13	1.55126e-11
Lepre1	256.75	0.728842	0.2245	3.24651	0.0011683	0.00662781
Bbs9	234.218	0.728815	0.211959	3.43848	0.000584991	0.00360197
Kalrn	3646.34	0.728715	0.102406	7.11597	1.1113e-12	2.32498e-11
Macrod2	222.145	0.728516	0.232346	3.13548	0.00171574	0.00927163
C430049B03Rik	508.954	0.727443	0.176989	4.1101	3.95479e-05	0.000320267
Peli1	1784.69	0.725395	0.0940511	7.71277	1.23113e-14	3.04705e-13
Lcor	807.492	0.724817	0.144772	5.00661	5.5397e-07	6.22939e-06
Strn	700.587	0.724739	0.154463	4.69198	2.70566e-06	2.71769e-05
Gusb	551.234	0.722447	0.16267	4.44119	8.94625e-06	8.27283e-05
Pbx1	4555.23	0.721472	0.077322	9.33075	1.05128e-20	3.80951e-19
Iqgap2	733.373	0.720467	0.128144	5.6223	1.88426e-08	2.53471e-07
Tapbp	224.184	0.719976	0.212369	3.39021	0.000698389	0.00421454
Lphn1	5334.48	0.719626	0.0726474	9.90575	3.93023e-23	1.67222e-21
Mpp2	302.837	0.719313	0.199113	3.61258	0.000303167	0.00201583
Ica1	321.937	0.719168	0.178562	4.02757	5.63567e-05	0.000440472
D630037F22Rik	383.205	0.718573	0.172434	4.16723	3.0832e-05	0.000255337
Myl6b	120.511	0.716842	0.25879	2.76998	0.00560592	0.0258802
Arhgap28	722.051	0.716565	0.135231	5.29881	1.16562e-07	1.44246e-06
Atp6v0d1	612.519	0.716075	0.137542	5.20622	1.92724e-07	2.30766e-06
Bbs1	344.729	0.714668	0.196273	3.64118	0.000271387	0.00181568
D630003M21Rik	172.245	0.714138	0.284295	2.51197	0.012006	0.0486244
Tyro3	1945.78	0.713637	0.09975	7.15426	8.41269e-13	1.80236e-11
Plekha1	1435.78	0.709827	0.134796	5.26595	1.39464e-07	1.70635e-06
Tc2n	106.763	0.707346	0.272448	2.59626	0.00942438	0.0398301
Spata13	513.913	0.707242	0.191519	3.6928	0.000221798	0.00151605
Acox1	631.244	0.707192	0.134464	5.25936	1.44554e-07	1.76435e-06
Tro	1647.27	0.706984	0.0946962	7.46581	8.27902e-14	1.90581e-12
Slc43a3	219.907	0.705709	0.212979	3.31351	0.000921328	0.00537986
Nova1	190.718	0.704665	0.22544	3.12573	0.00177363	0.00955713
Uvrag	443.656	0.704592	0.162343	4.34014	1.42391e-05	0.000126573
Prrg3	750.039	0.702672	0.137072	5.1263	2.95488e-07	3.45222e-06
Cacna1d	217.154	0.702355	0.237311	2.95964	0.00308004	0.0154532
Smpd1	255.656	0.70144	0.206391	3.3986	0.00067731	0.00409877
Cpped1	325.914	0.701301	0.18038	3.88791	0.000101111	0.00074709
Itga3	2449.67	-0.700075	0.102196	-6.85031	7.36914e-12	1.41292e-10
Hist1h3i	717.726	-0.70107	0.129594	-5.40975	6.31111e-08	8.04666e-07
Plch2	1304.69	-0.702714	0.136364	-5.15322	2.5605e-07	3.02055e-06
Sfxn5	253.27	-0.703503	0.207508	-3.39024	0.000698312	0.00421454
AI661453	2810.06	-0.705602	0.0781132	-9.03308	1.66905e-19	5.7197e-18
Spred3	201.15	-0.705866	0.210729	-3.34963	0.000809183	0.00480065
Anxa11	303.569	-0.706022	0.239674	-2.94576	0.00322158	0.0160729
Tradd	133.013	-0.706092	0.24681	-2.86087	0.00422485	0.020309
Chek2	385.96	-0.706842	0.163335	-4.32757	1.50766e-05	0.000133235
Ero1lb	185.232	-0.707374	0.244227	-2.89638	0.00377494	0.0184448
Hist1h3a	582.55	-0.711699	0.171237	-4.15623	3.2354e-05	0.000267066
Zmat5	162.232	-0.712022	0.23596	-3.01755	0.00254828	0.0130976
Flrt3	725.68	-0.713147	0.180778	-3.94489	7.98368e-05	0.000603136
Diexf	856.571	-0.713439	0.119191	-5.98566	2.15509e-09	3.26759e-08
Bcl11a	3573.79	-0.714979	0.0836677	-8.54546	1.28028e-17	3.91764e-16
Itm2b	2813.52	-0.715499	0.0792204	-9.03175	1.68947e-19	5.77661e-18
Emp1	582.241	-0.715542	0.16813	-4.25588	2.0823e-05	0.000179083
Fbln1	3573.07	-0.715557	0.0707941	-10.1076	5.11331e-24	2.27798e-22
Stk24	2141.63	-0.716158	0.0835063	-8.5761	9.81466e-18	3.05262e-16
D16Ertd472e	1087.01	-0.717632	0.119818	-5.98933	2.10709e-09	3.20121e-08
Kremen1	1647.21	-0.717886	0.111418	-6.44317	1.17006e-10	2.00939e-09
Tmem66	1010.03	-0.720215	0.112787	-6.38565	1.70669e-10	2.8884e-09
Dhcr24	3042.56	-0.720686	0.101109	-7.12783	1.01962e-12	2.148e-11
Fndc3b	2476.92	-0.72248	0.0962785	-7.50407	6.18681e-14	1.4484e-12
Ppp1r1a	94.8244	-0.722578	0.281994	-2.56239	0.0103954	0.0432344
Commd3	776.818	-0.722922	0.151336	-4.77692	1.77997e-06	1.85428e-05
Cdc42ep4	1628.56	-0.724644	0.0942681	-7.68705	1.50562e-14	3.69622e-13
C77080	992.623	-0.726163	0.130937	-5.54591	2.92422e-08	3.8449e-07
Gpc4	1218.69	-0.726261	0.111509	-6.51302	7.36525e-11	1.28824e-09
Spc25	1569.35	-0.726546	0.119228	-6.09374	1.10305e-09	1.71538e-08
Rapgef4	154.952	-0.726992	0.24966	-2.91192	0.00359209	0.0176941
Hist1h2bg	1775.69	-0.728024	0.288783	-2.52101	0.011702	0.0476351
Coq3	153.78	-0.729301	0.245302	-2.97307	0.00294839	0.0148716
Kif3c	772.65	-0.731256	0.145271	-5.03375	4.80976e-07	5.46947e-06
Ap1g2	194.964	-0.731296	0.230443	-3.17344	0.00150646	0.00827654
Nr1d2	253.082	-0.733256	0.241382	-3.03774	0.00238357	0.0123501
Ppl	2228.26	-0.733281	0.110987	-6.60689	3.92485e-11	7.06053e-10
B4galnt2	140.829	-0.73434	0.260839	-2.8153	0.00487321	0.0229665
Heg1	148.777	-0.735286	0.277842	-2.64642	0.00813491	0.0353368
Hoxa1	422.776	-0.737951	0.149396	-4.93955	7.83016e-07	8.5758e-06
Ppp2r2d	1663.97	-0.740829	0.103804	-7.1368	9.55268e-13	2.02087e-11
Hunk	2202.99	-0.741539	0.0858623	-8.63638	5.80241e-18	1.82342e-16
Zbed6	5081.58	-0.745793	0.0792368	-9.41221	4.85796e-21	1.79911e-19
Fut8	772.224	-0.745951	0.157652	-4.73162	2.22739e-06	2.27041e-05
Mtmr3	2142.5	-0.747547	0.0827269	-9.03633	1.62019e-19	5.56485e-18
Pole2	248.234	-0.75012	0.223954	-3.34943	0.000809775	0.00480065
Adk	717.258	-0.751045	0.146017	-5.14353	2.69624e-07	3.17573e-06
Itpr2	235.243	-0.751358	0.206254	-3.64288	0.000269606	0.00180536
Pgpep1	736.388	-0.75184	0.126766	-5.93095	3.01185e-09	4.48139e-08
Nox4	204.165	-0.752113	0.224136	-3.35561	0.000791907	0.00471132
Smyd2	1056.27	-0.75342	0.116053	-6.49205	8.4675e-11	1.47253e-09
Hspg2	8683.46	-0.755589	0.0745655	-10.1332	3.93489e-24	1.75816e-22
Alpk1	188.393	-0.756323	0.236052	-3.20406	0.00135506	0.00753492
Kif26b	613.734	-0.759132	0.1556	-4.87873	1.06773e-06	1.15274e-05
Hist1h2bh	761.115	-0.759922	0.130983	-5.80168	6.5652e-09	9.34615e-08
Slc1a5	686.412	-0.760609	0.165118	-4.60645	4.09607e-06	4.01314e-05
Skap2	593.823	-0.763629	0.133726	-5.7104	1.12709e-08	1.55909e-07
Pou6f1	608.601	-0.767004	0.17075	-4.49196	7.057e-06	6.63516e-05
Polm	189.768	-0.767593	0.228088	-3.36533	0.000764509	0.00457166
Lbh	304.398	-0.768962	0.192101	-4.00291	6.25681e-05	0.000484767
Itgb8	171.981	-0.769452	0.229098	-3.35862	0.000783332	0.00467131
Dnahc8	196.546	-0.770109	0.233455	-3.29875	0.000971157	0.00562959
Galnt4	349.745	-0.771329	0.186519	-4.13539	3.54349e-05	0.000290597
Sipa1l3	3743.05	-0.771561	0.0714884	-10.7928	3.72224e-27	2.00643e-25
Col2a1	17277.7	-0.772094	0.0572932	-13.4762	2.15948e-41	2.28739e-39
Pef1	526.328	-0.772194	0.14381	-5.36956	7.8928e-08	9.9544e-07
Hist1h4h	2497.7	-0.774737	0.122538	-6.32243	2.57488e-10	4.2859e-09
Rasgef1b	187.63	-0.77586	0.247717	-3.13204	0.00173596	0.0093675
Lrp1	4728.22	-0.776474	0.0784447	-9.89835	4.23202e-23	1.79057e-21
Hist1h4c	1884.11	-0.776617	0.0848967	-9.14779	5.81119e-20	2.03284e-18
Zfp503	2159.74	-0.777084	0.0950569	-8.17493	2.96038e-16	8.13808e-15
2010111I01Rik	570.842	-0.777206	0.148185	-5.24484	1.56419e-07	1.90151e-06
4921531C22Rik	130.876	-0.778826	0.293492	-2.65366	0.00796249	0.0347373
Tdrd1	175.638	-0.778914	0.225554	-3.45334	0.000553689	0.00342455
Helb	324.678	-0.780758	0.214312	-3.64309	0.000269382	0.00180466
Hnf1b	685.489	-0.785565	0.151892	-5.17188	2.31753e-07	2.74676e-06
Esrra	147.216	-0.785754	0.257066	-3.05663	0.00223843	0.0116996
Lama5	10684.4	-0.786348	0.0692148	-11.361	6.54068e-30	4.30747e-28
Cxxc4	1590.75	-0.787083	0.0923163	-8.52594	1.51574e-17	4.601e-16
Hist1h4a	1007.98	-0.787893	0.10926	-7.21114	5.54838e-13	1.20749e-11
2610203C20Rik	521.697	-0.795378	0.146202	-5.44028	5.31977e-08	6.84029e-07
Sgce	229.955	-0.799859	0.24649	-3.245	0.00117451	0.00666052
A130010J15Rik	220.534	-0.800345	0.206233	-3.88078	0.000104122	0.000766927
Ptplb	387.151	-0.80087	0.162605	-4.92524	8.42578e-07	9.20154e-06
Btg1	3106.11	-0.803112	0.102482	-7.83665	4.62737e-15	1.16818e-13
Nhp2	941.956	-0.803225	0.112565	-7.13565	9.63334e-13	2.03509e-11
Dll1	95.966	-0.803587	0.29865	-2.69074	0.00712948	0.0317059
Inpp5b	953.869	-0.8042	0.1153	-6.97485	3.06192e-12	6.1429e-11
9330020H09Rik	207.488	-0.808131	0.233459	-3.46156	0.000537048	0.00334072
C630043F03Rik	98.03	-0.81066	0.290893	-2.7868	0.00532313	0.0247786
Tspan12	521.121	-0.816004	0.190239	-4.28936	1.79186e-05	0.000156434
Vwa5a	525.706	-0.817637	0.13958	-5.85782	4.6898e-09	6.83043e-08
Limk2	2794.27	-0.817744	0.0858537	-9.52485	1.65284e-21	6.29035e-20
Bex4	1213.85	-0.817957	0.0990923	-8.25449	1.52549e-16	4.26378e-15
Fam84a	112.907	-0.818214	0.302802	-2.70214	0.00688939	0.0307919
Snai2	203.731	-0.819019	0.257875	-3.17603	0.00149306	0.00822077
Stk17b	134.129	-0.819055	0.25395	-3.22526	0.00125859	0.00706071
Plec	10136.5	-0.819455	0.061051	-13.4225	4.46603e-41	4.57074e-39
2610019F03Rik	115.301	-0.820486	0.275594	-2.97715	0.0029094	0.0147043
Gpr98	1599.46	-0.821505	0.138265	-5.94151	2.82408e-09	4.22691e-08
Fgf13	505.278	-0.82372	0.166175	-4.95694	7.16137e-07	7.89096e-06
Dmrt2	482.231	-0.825687	0.191243	-4.31748	1.57822e-05	0.000139065
Pygm	70.2418	-0.825843	0.328701	-2.51245	0.0119897	0.0485974
Tgif1	1585.68	-0.826333	0.0912393	-9.05676	1.34378e-19	4.63651e-18
Rapgef5	205.77	-0.826423	0.208701	-3.95985	7.49977e-05	0.000571423
Plxnc1	140.191	-0.829006	0.266525	-3.11042	0.00186819	0.0100133
Pkp3	535.367	-0.829311	0.17046	-4.86513	1.14382e-06	1.22963e-05
Sulf1	2022.31	-0.830742	0.262689	-3.16246	0.00156444	0.00854855
Bex2	996.563	-0.832396	0.109029	-7.63462	2.26494e-14	5.42834e-13
Acsl3	3411.63	-0.832404	0.0759153	-10.9649	5.63537e-28	3.25797e-26
Prr18	66.1556	-0.832646	0.326322	-2.55161	0.0107226	0.044388
Zfp867	190.983	-0.835753	0.22537	-3.70835	0.000208613	0.001435
Sfr1	4061.82	-0.83601	0.0731513	-11.4285	3.01234e-30	2.03696e-28
Sox6	1586.35	-0.836482	0.094935	-8.8111	1.2392e-18	4.01932e-17
Gm2518	113.467	-0.838503	0.27695	-3.02763	0.00246482	0.0127205
2810055F11Rik	118.462	-0.838542	0.285037	-2.94187	0.00326233	0.0162441
Raver2	1319.55	-0.838737	0.108534	-7.72791	1.09328e-14	2.72816e-13
Arl4a	707.657	-0.840102	0.134606	-6.24121	4.3419e-10	7.06411e-09
Homer2	1211.06	-0.844841	0.117602	-7.18392	6.77392e-13	1.4616e-11
Lmo7	1601.93	-0.844911	0.110463	-7.64881	2.0285e-14	4.88485e-13
Epb4.9	491.802	-0.845879	0.1512	-5.59443	2.21352e-08	2.94624e-07
Tmcc3	262.598	-0.847106	0.212749	-3.98171	6.84225e-05	0.000525556
Rbbp8	2530.57	-0.848377	0.0904807	-9.37634	6.83056e-21	2.50514e-19
Acvr1	630.472	-0.848831	0.15292	-5.5508	2.84369e-08	3.74226e-07
Pcdh1	185.522	-0.84937	0.257061	-3.30415	0.000952641	0.00553921
Hist1h2ad	74.2298	-0.849414	0.33186	-2.55956	0.0104806	0.0435409
Ddr1	2562.95	-0.849717	0.100039	-8.49382	1.99958e-17	6.00944e-16
Dsp	16116.1	-0.84976	0.0770246	-11.0323	2.669e-28	1.5549e-26
Tnc	89.4334	-0.849978	0.319963	-2.65649	0.00789589	0.0345143
Prr15	51.8759	-0.850026	0.337364	-2.51961	0.0117483	0.0477468
Pi4k2b	418.641	-0.850193	0.161796	-5.25471	1.48254e-07	1.8066e-06
Fam98a	600.996	-0.851181	0.129364	-6.57974	4.71269e-11	8.39802e-10
Chst15	591.833	-0.851366	0.161482	-5.2722	1.34802e-07	1.65599e-06
Acvr1b	1590.64	-0.851705	0.111134	-7.66378	1.80533e-14	4.3837e-13
Tada2a	1241.82	-0.853832	0.121748	-7.01309	2.33112e-12	4.72051e-11
Pvrl1	1204.12	-0.854384	0.10893	-7.84339	4.38537e-15	1.11079e-13
Notch1	1456.39	-0.85491	0.122757	-6.96428	3.30099e-12	6.58763e-11
Gcat	1047.77	-0.854919	0.108381	-7.88808	3.06859e-15	7.8381e-14
Hist1h3c	496.901	-0.855251	0.187646	-4.55779	5.16945e-06	4.97785e-05
Jak3	213.816	-0.856115	0.241286	-3.54813	0.000387976	0.0025157
Arhgap26	764.793	-0.857917	0.142917	-6.0029	1.93822e-09	2.95354e-08
Dgka	177.514	-0.860772	0.233489	-3.68656	0.00022731	0.00154744
Ppp1r36	227.455	-0.860902	0.205461	-4.1901	2.78828e-05	0.000234522
Cxcr4	253.357	-0.862405	0.209809	-4.11044	3.94908e-05	0.000320046
Cd9	381.524	-0.864625	0.18096	-4.77799	1.77055e-06	1.84574e-05
Prrg4	129.722	-0.86823	0.243825	-3.56087	0.000369631	0.00241016
Plch1	759.922	-0.868659	0.128301	-6.77049	1.28343e-11	2.39706e-10
Pcbd2	109.966	-0.870379	0.303205	-2.87059	0.00409702	0.0197888
Mkrn3	114.127	-0.871041	0.278045	-3.13274	0.00173183	0.00934852
1700084C01Rik	5.64845	-0.871625	0.34507	-2.52594	0.0115389	0.0470982
Cdr2	1012.71	-0.871926	0.105645	-8.25337	1.5399e-16	4.29557e-15
Mgat3	711.841	-0.872082	0.147118	-5.92776	3.07094e-09	4.56482e-08
Epb4.1l3	10114.9	-0.87478	0.0589613	-14.8365	8.50785e-50	1.16098e-47
Stap2	88.2212	-0.876741	0.304025	-2.88378	0.0039293	0.0191109
Dusp28	101.544	-0.877839	0.294115	-2.98468	0.00283877	0.0144001
Gpr39	94.997	-0.878034	0.305486	-2.87422	0.00405032	0.0196007
Arrdc2	138.773	-0.87811	0.274011	-3.20465	0.00135225	0.00752479
Tsix	103.729	-0.880853	0.302188	-2.91492	0.00355782	0.0175481
Trp53i11	1171.32	-0.881275	0.105575	-8.34734	6.98159e-17	1.98778e-15
4933404M02Rik	107.445	-0.881464	0.323638	-2.72361	0.00645727	0.0291356
Bok	217.431	-0.88196	0.223844	-3.94006	8.14609e-05	0.000612656
Fabp5	4344.36	-0.882705	0.0840883	-10.4974	8.8832e-26	4.47023e-24
Fmnl2	2017.07	-0.882716	0.0951201	-9.28001	1.69466e-20	6.09715e-19
B4galnt1	100.297	-0.883445	0.289722	-3.04928	0.0022939	0.0119524
Cuedc1	1550.05	-0.884202	0.101845	-8.68184	3.89422e-18	1.24706e-16
Adamts17	588.668	-0.884446	0.143246	-6.1743	6.64569e-10	1.06382e-08
Sema4b	989.471	-0.884937	0.123003	-7.19445	6.2713e-13	1.35896e-11
Ascc2	1325.29	-0.88549	0.104285	-8.49109	2.04705e-17	6.13992e-16
A930004D18Rik	208.305	-0.890075	0.206814	-4.30374	1.67939e-05	0.00014738
Sh3bp5	201.221	-0.890284	0.232677	-3.82626	0.000130105	0.00093667
Tmprss11d	5.74643	-0.890611	0.347122	-2.5657	0.0102968	0.0429068
5730559C18Rik	2075.15	-0.891541	0.0805699	-11.0654	1.8458e-28	1.09212e-26
Phldb3	116.402	-0.892422	0.258416	-3.45344	0.000553493	0.00342455
Mbnl2	2599.09	-0.895033	0.0821181	-10.8993	1.16105e-27	6.53769e-26
Gpd2	1173.53	-0.896111	0.132653	-6.7553	1.42538e-11	2.64911e-10
Lass3	85.8271	-0.896453	0.307196	-2.91818	0.00352086	0.0173828
Epb4.1l4b	320.946	-0.896933	0.214535	-4.18083	2.90443e-05	0.000243326
Nrtn	59.228	-0.89844	0.342114	-2.62614	0.00863581	0.0371083
Mcam	149.309	-0.90064	0.244342	-3.68598	0.000227824	0.00154955
Nfatc2	336.458	-0.901072	0.180151	-5.00175	5.68114e-07	6.3601e-06
1810064F22Rik	6.07978	-0.901096	0.355315	-2.53605	0.0112112	0.0460832
Fmod	1852.32	-0.901259	0.134315	-6.71003	1.94586e-11	3.57693e-10
Gm16287	6.02738	-0.901796	0.35762	-2.52166	0.0116803	0.0475597
Nebl	87.7532	-0.901815	0.298483	-3.02133	0.00251668	0.0129528
Ispd	112.747	-0.901907	0.275211	-3.27714	0.00104863	0.00601877
Slc22a15	121.147	-0.909512	0.256725	-3.54275	0.000395974	0.00256207
Hist2h3b	466.282	-0.909756	0.149084	-6.1023	1.04552e-09	1.62927e-08
Fgd6	987.907	-0.910663	0.124614	-7.30788	2.7139e-13	6.0011e-12
Axin2	1464.41	-0.911064	0.0898223	-10.143	3.56125e-24	1.59592e-22
Utp14b	3178.99	-0.912705	0.0758744	-12.0292	2.49678e-33	1.87221e-31
Folh1	5.87057	-0.912834	0.349446	-2.61223	0.00899529	0.0383807
Smpdl3b	75.9906	-0.913349	0.30823	-2.9632	0.00304454	0.0153106
Map3k8	48.027	-0.915468	0.359565	-2.54605	0.0108951	0.0450157
Plekhg3	5989.65	-0.91649	0.0759603	-12.0654	1.60937e-33	1.22498e-31
Hist1h2ba	386.986	-0.916557	0.240192	-3.81593	0.000135668	0.000971157
Dnajb7	5.92685	-0.916974	0.349855	-2.62102	0.00876682	0.0375859
Tmem150c	81.3503	-0.920518	0.293025	-3.14143	0.00168124	0.00913734
Ppp1r13l	1008.54	-0.9219	0.104238	-8.84416	9.22191e-19	3.01694e-17
Gm4890	54.3145	-0.92209	0.36423	-2.53162	0.0113538	0.0465305
Dkk2	45.9032	-0.92243	0.348976	-2.64325	0.00821149	0.0356348
Tsku	230.467	-0.923183	0.202497	-4.55899	5.13991e-06	4.95256e-05
Pcyt1b	419.132	-0.928274	0.168287	-5.51602	3.46754e-08	4.52004e-07
Bdnf	87.5907	-0.929679	0.283354	-3.28098	0.00103446	0.00595102
Zmat3	1453.88	-0.930158	0.10584	-8.78834	1.51789e-18	4.91271e-17
Hsdl2	525.864	-0.931139	0.16604	-5.60792	2.0477e-08	2.7424e-07
Fgf3	7.01747	-0.931442	0.350797	-2.65521	0.0079258	0.0346171
Dgkh	237.258	-0.932991	0.243054	-3.83862	0.000123729	0.000896652
Mt2	61.5039	-0.934307	0.368275	-2.53698	0.0111813	0.045985
Wnt5b	314.046	-0.934928	0.201827	-4.63232	3.6159e-06	3.56112e-05
Trim8	2841.44	-0.935631	0.0898556	-10.4126	2.17196e-25	1.07864e-23
Lrrn4cl	49.1658	-0.937762	0.35993	-2.6054	0.00917673	0.0389683
Hist4h4	3560.12	-0.940764	0.0997916	-9.42729	4.20832e-21	1.56618e-19
Usp43	225.351	-0.941907	0.278291	-3.38462	0.000712779	0.00429624
Rgs22	115.933	-0.942007	0.292349	-3.2222	0.00127208	0.00712847
Comtd1	95.6771	-0.942156	0.29195	-3.22712	0.00125045	0.00702542
Kctd1	859.273	-0.942624	0.149623	-6.29998	2.97691e-10	4.9334e-09
2410124H12Rik	6.17817	-0.94369	0.352475	-2.67732	0.0074213	0.0327441
Pdpn	478.258	-0.943932	0.154194	-6.12171	9.25743e-10	1.4561e-08
Gtf2ird1	3179.2	-0.945221	0.0727808	-12.9872	1.44543e-38	1.35148e-36
Cdh3	5559.91	-0.945621	0.0627964	-15.0585	3.03522e-51	4.21784e-49
Hist1h2bj	710.323	-0.948284	0.166819	-5.68451	1.31188e-08	1.79992e-07
Sh3rf1	1609.16	-0.948383	0.0904915	-10.4804	1.06346e-25	5.33386e-24
Arhgdib	31.1219	-0.948874	0.37873	-2.50541	0.012231	0.0493773
Rab38	256.33	-0.949334	0.226314	-4.19478	2.73142e-05	0.000230105
Ehhadh	63.0474	-0.950331	0.347991	-2.73091	0.00631595	0.0286074
Kcnc3	155.464	-0.950979	0.236774	-4.0164	5.90951e-05	0.000460212
Stambpl1	50.4869	-0.951732	0.35874	-2.65299	0.00797822	0.0347859
Rgs14	50.279	-0.954629	0.344776	-2.76884	0.00562561	0.0259397
Rnf43	3279.59	-0.954913	0.0756389	-12.6246	1.54479e-36	1.34476e-34
Ube2q2	991.184	-0.955183	0.129875	-7.35463	1.91456e-13	4.28992e-12
Nav2	8460.97	-0.959048	0.060982	-15.7267	9.9206e-56	1.61578e-53
Mrap2	41.6354	-0.9602	0.371591	-2.58403	0.0097654	0.0409855
Sec24d	252.474	-0.961097	0.195547	-4.91493	8.88141e-07	9.67818e-06
Ctgf	365.776	-0.96116	0.203291	-4.72799	2.26748e-06	2.30817e-05
Irak4	97.6975	-0.961169	0.321976	-2.98522	0.00283373	0.0143794
Usp2	161.008	-0.96319	0.292136	-3.29706	0.00097701	0.00565702
Svopl	6.45334	-0.963532	0.363126	-2.65344	0.00796764	0.0347498
Sesn1	467.777	-0.964109	0.172256	-5.59695	2.18159e-08	2.90629e-07
Pdgfc	2702.48	-0.964421	0.0938345	-10.2779	8.86384e-25	4.22203e-23
Nxn	1511.76	-0.96492	0.101919	-9.46752	2.86571e-21	1.0771e-19
Zfhx3	9892.19	-0.965956	0.177992	-5.42696	5.73228e-08	7.32717e-07
Ovol2	292.526	-0.968161	0.199227	-4.8596	1.17624e-06	1.26179e-05
Pld4	65.2546	-0.973184	0.363733	-2.67555	0.00746078	0.03288
Gimap1	32.6187	-0.973887	0.386049	-2.52271	0.0116456	0.0474438
Fam167a	63.0295	-0.974166	0.349509	-2.78724	0.00531585	0.0247523
Arsj	7.12687	-0.975076	0.355052	-2.74629	0.00602734	0.0275154
Arsa	105.359	-0.976108	0.281279	-3.47025	0.000519971	0.0032465
Nhsl1	4105.48	-0.97829	0.0704314	-13.89	7.28612e-44	8.29796e-42
Prrt4	10.1985	-0.978915	0.390115	-2.5093	0.012097	0.0489144
Hoxc4	880.307	-0.979242	0.122485	-7.99477	1.29817e-15	3.42566e-14
Bcl2l10	7.82731	-0.979679	0.372071	-2.63304	0.00846238	0.0365184
Lpo	7.47933	-0.980911	0.376057	-2.60841	0.00909643	0.038725
Tinagl1	361.308	-0.981646	0.164886	-5.95349	2.62491e-09	3.94048e-08
Lpin2	1947.1	-0.98191	0.0938308	-10.4647	1.25485e-25	6.27301e-24
Cfc1	8.85564	-0.982326	0.361633	-2.71636	0.00660038	0.0296672
Nhlh2	46.7808	-0.985521	0.345066	-2.85604	0.00428964	0.0205748
Amotl1	9672.91	-0.987526	0.0725322	-13.615	3.26153e-42	3.57988e-40
2900011O08Rik	36.0025	-0.988955	0.38905	-2.54197	0.011023	0.0454574
Sh2d4a	170.63	-0.98926	0.243552	-4.0618	4.8696e-05	0.000385572
Zfp36l2	2755.14	-0.991068	0.0756321	-13.1038	3.13224e-39	3.00279e-37
9030425E11Rik	78.9096	-0.992005	0.318826	-3.11143	0.00186183	0.00998271
Ldhc	6.92026	-0.993918	0.35695	-2.78447	0.00536147	0.0249248
Galnt10	302.705	-0.99506	0.176539	-5.63651	1.73536e-08	2.34901e-07
Wfdc2	1147	-0.995164	0.105554	-9.42805	4.17784e-21	1.55866e-19
Kcnq5	42.8746	-0.996601	0.383841	-2.59639	0.00942091	0.0398265
Ggh	230.153	-0.9968	0.214013	-4.65766	3.19823e-06	3.1808e-05
Mical3	821.279	-0.998711	0.146138	-6.83404	8.25547e-12	1.57886e-10
BC057022	196.846	-1.0032	0.24636	-4.07208	4.65948e-05	0.000370483
Nedd4l	1985.19	-1.00394	0.0919834	-10.9144	9.83975e-28	5.58212e-26
Fbxo47	8.59989	-1.00402	0.375235	-2.67572	0.00745686	0.0328722
Nhlrc1	73.5139	-1.00418	0.305873	-3.28301	0.00102707	0.0059152
Pdlim2	42.7722	-1.00651	0.385696	-2.60958	0.00906523	0.0386367
Cd59b	7.94014	-1.00858	0.357846	-2.81848	0.00482515	0.0227755
Col18a1	11370.6	-1.00914	0.0698903	-14.439	2.94169e-47	3.56462e-45
Cdh11	1129.16	-1.00928	0.150505	-6.70594	2.00114e-11	3.66964e-10
Spin2	141.199	-1.0104	0.287837	-3.51033	0.000447546	0.00284115
Shank2	504.059	-1.01131	0.180198	-5.61223	1.99739e-08	2.67976e-07
Eif4ebp1	435.689	-1.01176	0.170761	-5.92499	3.12319e-09	4.63793e-08
Dcx	949.412	-1.01261	0.146055	-6.93312	4.11665e-12	8.15097e-11
Robo1	5106.09	-1.01329	0.0655029	-15.4694	5.58205e-54	8.28934e-52
S1pr1	53.4957	-1.01628	0.350408	-2.90026	0.00372848	0.0182709
Sfrp2	318.285	-1.01713	0.187114	-5.43586	5.45318e-08	6.99995e-07
Asprv1	20.9049	-1.01734	0.402614	-2.52685	0.0115091	0.0470268
Muc4	101.708	-1.0182	0.364167	-2.79597	0.00517442	0.0241755
Nfkbia	603.7	-1.01911	0.167137	-6.09746	1.07766e-09	1.67764e-08
Klf5	2664.3	-1.02091	0.10396	-9.82022	9.2138e-23	3.83411e-21
Kremen2	124.844	-1.02275	0.382049	-2.677	0.00742841	0.0327659
Hcrtr1	23.376	-1.02287	0.403933	-2.53228	0.0113324	0.0464838
Elf5	106.494	-1.02344	0.28954	-3.53472	0.000408207	0.00262999
St6gal2	259.58	-1.02348	0.217624	-4.70298	2.56391e-06	2.58559e-05
Tcerg1l	43.1888	-1.02439	0.365582	-2.80208	0.00507744	0.0237811
Anxa3	73.3579	-1.02482	0.322383	-3.1789	0.00147838	0.00815475
Nck2	1561.04	-1.02572	0.100093	-10.2477	1.21251e-24	5.75735e-23
Bag2	869.437	-1.02596	0.121224	-8.46333	2.59854e-17	7.6576e-16
Pigf	363.111	-1.026	0.198269	-5.17478	2.28185e-07	2.70871e-06
AI463170	23.3174	-1.02725	0.402284	-2.55354	0.0106633	0.0442148
Ass1	60.6167	-1.02767	0.322809	-3.18352	0.00145498	0.00804621
Pvrl4	258.142	-1.02866	0.260882	-3.943	8.04686e-05	0.000607606
Hes1	2820.1	-1.03013	0.0836308	-12.3176	7.28705e-35	5.90251e-33
Sv2b	81.504	-1.03041	0.323871	-3.18153	0.00146499	0.00809273
Aqp11	13.5474	-1.03465	0.396642	-2.60853	0.00909313	0.0387218
Sh3bgrl	2911.52	-1.03537	0.0838544	-12.3472	5.04072e-35	4.17223e-33
Hist1h2bb	2056.01	-1.03865	0.0918564	-11.3073	1.20689e-29	7.77902e-28
Ccdc160	50.8337	-1.03874	0.367345	-2.82771	0.00468829	0.0222089
Rims2	185.423	-1.04106	0.263157	-3.95603	7.62045e-05	0.000579452
Pgbd5	228.726	-1.04347	0.240215	-4.34391	1.39971e-05	0.000124567
Acbd4	63.2803	-1.04431	0.34903	-2.99203	0.0027713	0.0140909
Nat6	616.133	-1.04456	0.139866	-7.46825	8.12685e-14	1.87648e-12
Hmgn5	4823.12	-1.0469	0.0656161	-15.9549	2.63485e-57	4.48427e-55
Amot	1392.11	-1.04759	0.148682	-7.04584	1.84339e-12	3.77833e-11
1110028F11Rik	199.408	-1.04897	0.246203	-4.26056	2.03911e-05	0.000175892
Cacna1e	55.8677	-1.05115	0.381274	-2.75693	0.00583461	0.0267323
Sspo	89.1616	-1.05262	0.299529	-3.51423	0.000441028	0.00280276
Lypla1	1295.29	-1.05286	0.10135	-10.3884	2.80094e-25	1.37746e-23
Mecr	357.46	-1.0536	0.178391	-5.90614	3.50226e-09	5.17045e-08
Vegfa	3561.65	-1.05686	0.0797345	-13.2548	4.23485e-40	4.22009e-38
Epha2	409.519	-1.05826	0.164071	-6.45001	1.11843e-10	1.92292e-09
Rin2	1283.21	-1.06014	0.111914	-9.47281	2.7241e-21	1.02642e-19
Cldn23	65.3961	-1.06207	0.314709	-3.37478	0.000738758	0.00443694
BC025920	54.4409	-1.06376	0.336011	-3.16584	0.00154637	0.00846816
Ctnnb1	31360.3	-1.06475	0.0509966	-20.8788	8.33911e-97	3.71507e-94
Meis1	2086.12	-1.06619	0.0992373	-10.7439	6.33445e-27	3.37845e-25
Lynx1	19.6026	-1.06752	0.404074	-2.64189	0.00824452	0.0357412
Hmox1	182.384	-1.06851	0.236924	-4.50993	6.48476e-06	6.12373e-05
9430060I03Rik	13.8366	-1.06946	0.403509	-2.6504	0.00803973	0.0350037
Hspb8	619.673	-1.07047	0.154475	-6.92973	4.21633e-12	8.32657e-11
Pbld1	88.9569	-1.07153	0.304535	-3.51859	0.000433854	0.00276932
5730508B09Rik	122.846	-1.07234	0.271697	-3.94684	7.91887e-05	0.000598838
Ccdc17	32.3285	-1.07387	0.3921	-2.73877	0.00616695	0.0280429
Dfna5	42.6959	-1.07419	0.368271	-2.91684	0.00353597	0.017446
Ang	13.3377	-1.07823	0.38698	-2.78626	0.00533202	0.0248123
Mfng	65.5043	-1.0809	0.334814	-3.22836	0.00124501	0.00700528
Lrrtm1	122.465	-1.08165	0.321026	-3.36934	0.000753476	0.0045146
Ikzf2	1213.41	-1.08168	0.0978113	-11.0589	1.98573e-28	1.17035e-26
Ppargc1b	88.8465	-1.08579	0.376527	-2.88371	0.00393018	0.0191109
Gnpda2	523.263	-1.08628	0.15783	-6.8826	5.87697e-12	1.13544e-10
Upp1	16.4024	-1.09051	0.392944	-2.77524	0.00551617	0.0255359
Fzd6	1085.46	-1.09167	0.107008	-10.2018	1.94727e-24	8.99246e-23
Glrx	45.9094	-1.09208	0.362594	-3.01186	0.00259654	0.0132961
Drp2	85.6131	-1.09321	0.33136	-3.29914	0.000969809	0.00562393
Lrch4-sap25	21.8159	-1.09342	0.404505	-2.70312	0.00686926	0.0307291
Slc12a4	1255.24	-1.09456	0.111074	-9.85435	6.56413e-23	2.75421e-21
Efs	901.934	-1.09754	0.130296	-8.42343	3.65628e-17	1.06503e-15
Foxj1	46.3855	-1.09775	0.369428	-2.97148	0.00296372	0.0149389
Avpi1	174.09	-1.0981	0.239527	-4.58445	4.55185e-06	4.42818e-05
Rnu11	65.6964	-1.09964	0.345933	-3.17875	0.00147909	0.00815573
1700012D14Rik	33.0788	-1.10108	0.379967	-2.89783	0.00375748	0.0183807
Pqlc3	163.308	-1.10163	0.244444	-4.50666	6.58554e-06	6.20729e-05
Obfc2a	280.17	-1.10429	0.235333	-4.69245	2.6995e-06	2.71329e-05
Slc35d1	392.627	-1.10619	0.188712	-5.86177	4.5796e-09	6.68278e-08
Gm10638	26.8308	-1.10935	0.397067	-2.79386	0.00520825	0.0243138
Sh3rf2	75.9023	-1.10957	0.322705	-3.43834	0.00058529	0.00360235
Retsat	73.5212	-1.11078	0.34035	-3.26365	0.00109987	0.0062843
D830005E20Rik	16.988	-1.11394	0.404406	-2.75452	0.00587778	0.0268894
1600029O15Rik	17.9772	-1.1146	0.40367	-2.76116	0.00575959	0.0264766
Sesn2	447	-1.11538	0.195009	-5.71963	1.06757e-08	1.48218e-07
Pde1c	162.975	-1.11775	0.261889	-4.26803	1.9721e-05	0.000170889
Bcl11b	2014	-1.11816	0.103057	-10.8499	1.99578e-27	1.1114e-25
Sox2	5104.71	-1.12056	0.0773361	-14.4894	1.41287e-47	1.76866e-45
Galntl4	580.255	-1.12213	0.175397	-6.39762	1.57821e-10	2.68296e-09
1810011O10Rik	53.8706	-1.12288	0.37687	-2.97949	0.00288725	0.0146074
Fras1	9717.87	-1.12499	0.0839358	-13.403	5.80749e-41	5.90376e-39
Abcc4	418.901	-1.12614	0.195255	-5.76753	8.04405e-09	1.13554e-07
Prr5l	456.688	-1.12824	0.147441	-7.65216	1.97626e-14	4.76663e-13
Apcdd1	137.366	-1.13025	0.283882	-3.9814	6.85115e-05	0.000525972
Dkk3	357.828	-1.13074	0.191934	-5.89128	3.83204e-09	5.63534e-08
Actl7b	10.9937	-1.1318	0.386898	-2.92533	0.00344094	0.0170104
Nt5e	53.8466	-1.13285	0.366102	-3.09437	0.00197234	0.0104935
1700019N12Rik	15.41	-1.1334	0.393794	-2.87815	0.0040001	0.0194073
Tcam1	9.76309	-1.13403	0.391037	-2.90005	0.00373101	0.0182715
Xk	114.92	-1.13434	0.295674	-3.83648	0.000124812	0.000903262
Cx3cl1	88.3952	-1.13519	0.305448	-3.71646	0.000202034	0.0013929
9130230L23Rik	9.28317	-1.1356	0.387186	-2.93297	0.00335736	0.0166734
Fosl2	522.984	-1.1401	0.165858	-6.87397	6.24408e-12	1.2033e-10
Tle4	1608.12	-1.14174	0.252694	-4.51827	6.23477e-06	5.90238e-05
AU018091	11.8404	-1.14359	0.392743	-2.91181	0.00359344	0.017695
Bcam	4569	-1.14644	0.101358	-11.3109	1.15912e-29	7.50307e-28
Ndufa4l2	23.0095	-1.14794	0.403877	-2.84231	0.00447873	0.0213465
Kcnip3	140.008	-1.14815	0.29388	-3.90687	9.34979e-05	0.000695245
Tead4	166.503	-1.14953	0.246467	-4.66404	3.10068e-06	3.09394e-05
BC064078	74.0598	-1.15078	0.337973	-3.40494	0.000661796	0.00401772
Steap2	149.766	-1.15187	0.247756	-4.64922	3.33193e-06	3.30942e-05
Maff	133.763	-1.15388	0.277661	-4.15571	3.24277e-05	0.000267529
Macc1	422.099	-1.1545	0.184529	-6.25648	3.93759e-10	6.42701e-09
Serpinb1b	7.63148	-1.15539	0.370051	-3.12225	0.00179473	0.00965709
Tmem79	98.8929	-1.15602	0.279737	-4.13253	3.58799e-05	0.000293928
Tshz1	2430.16	-1.15746	0.0855185	-13.5346	9.76781e-42	1.04192e-39
Gad1	16.202	-1.15928	0.393063	-2.94934	0.00318452	0.0159195
Zfp809	570.393	-1.16278	0.15654	-7.42798	1.10265e-13	2.51556e-12
Btbd11	359.674	-1.16293	0.170776	-6.80965	9.78363e-12	1.85459e-10
3110045C21Rik	26.0318	-1.16404	0.390478	-2.98106	0.00287255	0.0145423
Adamts16	21.881	-1.16462	0.401087	-2.90367	0.00368817	0.0180851
Gcnt2	281.443	-1.16582	0.182685	-6.38158	1.75268e-10	2.95962e-09
Fryl	3758.59	-1.16647	0.104926	-11.1171	1.03607e-28	6.2523e-27
Nr3c1	1542.17	-1.16786	0.12325	-9.4755	2.65482e-21	1.00281e-19
Slk	5479.18	-1.16816	0.0760107	-15.3684	2.66872e-53	3.84982e-51
Mir205	17.6088	-1.1688	0.402542	-2.90355	0.00368959	0.0180862
Ptger4	24.3803	-1.17037	0.404327	-2.89461	0.0037963	0.0185432
Enpp3	62.9508	-1.17059	0.345345	-3.38963	0.000699877	0.00422184
Serpine1	32.9847	-1.1732	0.397006	-2.95511	0.00312556	0.0156609
Tcf7	424.632	-1.17361	0.177706	-6.60424	3.99555e-11	7.17068e-10
Prickle2	952.879	-1.17369	0.170667	-6.87704	6.11069e-12	1.17909e-10
Ahr	537.041	-1.17484	0.192488	-6.10348	1.03785e-09	1.62065e-08
Cacna1a	403.268	-1.17699	0.167096	-7.0438	1.8706e-12	3.82892e-11
Rab27b	136.641	-1.17954	0.260511	-4.52781	5.95979e-06	5.68111e-05
Hist1h4f	1347.95	-1.18165	0.0959179	-12.3194	7.12301e-35	5.80065e-33
Lamb3	1262.64	-1.18174	0.105541	-11.197	4.21578e-29	2.61707e-27
Adrb3	14.5749	-1.18232	0.399322	-2.96083	0.00306814	0.0154191
Jag1	1361.39	-1.18452	0.110858	-10.685	1.19633e-26	6.29196e-25
Irs1	4919.99	-1.1899	0.0758558	-15.6863	1.87699e-55	3.02455e-53
Elovl7	185.885	-1.19247	0.227276	-5.24677	1.54786e-07	1.88316e-06
Apol8	31.3433	-1.19256	0.398147	-2.99527	0.00274199	0.013956
Ugt8a	594.562	-1.19265	0.139327	-8.56008	1.12787e-17	3.4865e-16
Lima1	1486.19	-1.19275	0.107471	-11.0983	1.27909e-28	7.68825e-27
Mir1894	85.06	-1.19343	0.30333	-3.93443	8.33957e-05	0.000626584
Itgb7	44.2728	-1.20223	0.399087	-3.01245	0.00259145	0.0132745
Creb3l1	23.2012	-1.20529	0.403921	-2.98397	0.0028453	0.0144285
Cebpa	464.294	-1.20658	0.172294	-7.00304	2.50461e-12	5.04486e-11
6230427J02Rik	36.3239	-1.20669	0.391314	-3.08368	0.00204458	0.0108133
St8sia4	63.1607	-1.20766	0.330491	-3.65415	0.000258035	0.00173632
Pld6	29.9067	-1.21114	0.385973	-3.13788	0.00170176	0.00921909
Cadm2	90.3787	-1.21305	0.292359	-4.14918	3.33674e-05	0.000274683
2510009E07Rik	129.356	-1.2136	0.283036	-4.2878	1.80449e-05	0.000157355
Tmem141	82.3159	-1.21421	0.311316	-3.90025	9.60952e-05	0.000712808
Pink1	1326.18	-1.21501	0.126054	-9.63881	5.48175e-22	2.15668e-20
Prss12	30.074	-1.21684	0.398805	-3.05121	0.0022792	0.011884
1600014C10Rik	391.686	-1.21708	0.235554	-5.16687	2.38049e-07	2.81698e-06
Hoxa5	176.859	-1.21856	0.244649	-4.98085	6.33047e-07	7.02988e-06
Mab21l3	111.436	-1.21956	0.297937	-4.09336	4.25159e-05	0.000341276
Ttc39c	347.89	-1.22005	0.19279	-6.3284	2.47719e-10	4.14149e-09
Hoxa4	400.922	-1.2202	0.195598	-6.23829	4.42372e-10	7.18949e-09
Krt5	373.477	-1.22115	0.234552	-5.20631	1.92628e-07	2.30766e-06
Nfe2l3	395.881	-1.22166	0.16988	-7.19131	6.41744e-13	1.38864e-11
Rgs5	71.9639	-1.22277	0.340713	-3.58886	0.000332129	0.00219492
Cort	15.3036	-1.22481	0.401817	-3.04818	0.00230233	0.011984
Jag2	1911.52	-1.22547	0.233722	-5.24327	1.57759e-07	1.91494e-06
Slc5a9	45.9733	-1.22606	0.353573	-3.46763	0.000525068	0.00327427
Rasgrp1	26.669	-1.22671	0.404368	-3.03364	0.00241619	0.0124951
Lfng	781.277	-1.22742	0.137855	-8.9037	5.40143e-19	1.8021e-17
Gm17762	52.1282	-1.2283	0.360733	-3.40502	0.000661603	0.00401772
Dusp14	209.704	-1.22965	0.23597	-5.21105	1.87779e-07	2.25201e-06
Carhsp1	2711.14	-1.23429	0.0850209	-14.5175	9.38743e-48	1.20501e-45
Dmrta2	97.165	-1.23623	0.286977	-4.30775	1.6492e-05	0.000144814
Ppp1r3b	2895.92	-1.23713	0.204067	-6.06237	1.34126e-09	2.07519e-08
Nnat	3043.61	-1.24172	0.108931	-11.3992	4.22188e-30	2.80477e-28
Rnd3	1699.65	-1.24319	0.238074	-5.22186	1.77135e-07	2.13281e-06
Coro2a	362.186	-1.24415	0.198335	-6.27299	3.54179e-10	5.81229e-09
Kcnk4	10.0663	-1.24852	0.385879	-3.23551	0.00121424	0.00685759
Smox	1098.85	-1.25223	0.115564	-10.8358	2.32869e-27	1.28733e-25
Arhgap32	3237.77	-1.25235	0.0766447	-16.3397	5.14767e-60	9.17315e-58
Slc8a3	50.1763	-1.25238	0.386861	-3.23728	0.00120677	0.00682305
Gli1	375.088	-1.25364	0.177414	-7.0662	1.5923e-12	3.28143e-11
Pex5l	48.7626	-1.25431	0.358285	-3.50087	0.000463745	0.00292925
Pdgfa	1488.32	-1.2562	0.136597	-9.19642	3.70089e-20	1.31282e-18
Tgm1	37.9414	-1.25697	0.376014	-3.34288	0.000829147	0.00490207
Atp2c2	313.342	-1.25881	0.184969	-6.80553	1.00675e-11	1.90377e-10
Mt1	221.644	-1.26169	0.218029	-5.7868	7.17397e-09	1.01841e-07
Crmp1	87.4415	-1.26845	0.32895	-3.85605	0.000115232	0.000838738
Adamts14	76.5155	-1.26912	0.324797	-3.90744	9.32789e-05	0.000693956
Mycl1	1965.49	-1.27001	0.122045	-10.406	2.32699e-25	1.15186e-23
Itpr3	839.114	-1.27523	0.119614	-10.6612	1.54575e-26	8.04586e-25
Slc4a9	10.3671	-1.27761	0.382355	-3.34142	0.000833514	0.00492596
BC037704	23.1688	-1.27985	0.397797	-3.21735	0.00129379	0.00723672
Tns3	6522.8	-1.28102	0.0679574	-18.8504	2.91731e-79	1.00428e-76
Ano3	20.2758	-1.28147	0.399033	-3.21143	0.00132074	0.00736314
Uqcr10	572.033	-1.28161	0.153097	-8.37122	5.7025e-17	1.6359e-15
Chrm4	22.5173	-1.28408	0.404492	-3.17455	0.00150069	0.00825979
Mgmt	49.0186	-1.2871	0.358322	-3.59202	0.000328121	0.0021709
Sp8	90.3415	-1.28991	0.309768	-4.16411	3.12572e-05	0.000258717
Krt14	16.6487	-1.29121	0.402614	-3.20708	0.00134092	0.00746448
Ptprd	980.834	-1.29334	0.143846	-8.99119	2.44563e-19	8.32447e-18
Hes5	22.4252	-1.29629	0.401599	-3.22781	0.00124741	0.00701614
Adcy8	146.613	-1.29926	0.264712	-4.9082	9.19143e-07	1.00088e-05
Arap2	231.864	-1.30133	0.207334	-6.27646	3.46375e-10	5.69658e-09
Serinc5	659.898	-1.3019	0.147367	-8.83441	1.00625e-18	3.28486e-17
Rnf32	217.594	-1.30208	0.20583	-6.32598	2.51636e-10	4.19311e-09
2010011I20Rik	2495.69	-1.30315	0.075853	-17.18	3.74837e-66	8.73486e-64
Arhgap23	877.551	-1.30553	0.127536	-10.2365	1.3601e-24	6.41789e-23
Acot7	537.218	-1.30633	0.143072	-9.13061	6.81131e-20	2.37174e-18
Ugt1a6a	13.5691	-1.309	0.389832	-3.35785	0.000785521	0.0046786
Plekha7	2272.39	-1.30908	0.0807972	-16.202	4.88084e-59	8.59651e-57
Dlk2	80.0347	-1.31188	0.336357	-3.90027	9.60851e-05	0.000712808
Cspg5	54.7505	-1.3128	0.374545	-3.50505	0.000456522	0.00289086
Me3	45.1158	-1.31359	0.382067	-3.43811	0.000585798	0.00360255
Efhc2	47.2303	-1.31415	0.386168	-3.40305	0.000666377	0.00404068
Itgb4	1408.68	-1.31434	0.142244	-9.24003	2.46423e-20	8.82406e-19
Tbc1d1	2844.33	-1.31582	0.0888087	-14.8163	1.1494e-49	1.55446e-47
Lamb1	6580.96	-1.31763	0.0950366	-13.8644	1.04021e-43	1.17582e-41
9030617O03Rik	25.0792	-1.3188	0.404377	-3.26131	0.00110899	0.00633401
Tpm1	7760.14	-1.31985	0.077499	-17.0306	4.872e-65	1.05423e-62
Cbr3	30.0102	-1.32224	0.404421	-3.26947	0.00107751	0.00617285
S100a10	578.446	-1.32245	0.171698	-7.70221	1.33733e-14	3.3045e-13
Ncf1	41.2217	-1.32991	0.382052	-3.48096	0.000499619	0.00313104
Grhl3	916.12	-1.33006	0.16902	-7.86925	3.56767e-15	9.0782e-14
Pmepa1	730.303	-1.33843	0.121078	-11.0543	2.09065e-28	1.22267e-26
Scn4b	37.1181	-1.33921	0.383724	-3.49003	0.000482964	0.00303924
E130102H24Rik	21.3526	-1.33953	0.403726	-3.31791	0.000906928	0.00531216
Vsig8	26.3466	-1.34143	0.403539	-3.32417	0.000886834	0.00520654
Ablim3	112.723	-1.34198	0.331889	-4.04347	5.26669e-05	0.00041412
Lrp4	3553.43	-1.34626	0.0795934	-16.9142	3.53828e-64	7.24247e-62
Peg10	853.018	-1.35008	0.169306	-7.97418	1.534e-15	4.02695e-14
S100a16	31.3511	-1.35029	0.393267	-3.43352	0.000595791	0.00365658
Usp13	359.248	-1.3517	0.170113	-7.9459	1.9278e-15	5.02587e-14
Fam83b	1094.72	-1.35375	0.125149	-10.8171	2.85667e-27	1.56209e-25
Adamts18	600.98	-1.35407	0.348923	-3.88071	0.000104151	0.000766927
Fry	815.913	-1.35566	0.161873	-8.37485	5.52925e-17	1.58921e-15
Ston1	684.598	-1.35615	0.148164	-9.15299	5.53812e-20	1.94631e-18
Spred2	910.399	-1.35643	0.126104	-10.7564	5.52679e-27	2.9581e-25
Rarg	1194.4	-1.3566	0.136661	-9.9268	3.18294e-23	1.35808e-21
Tmsb4x	2192.72	-1.35706	0.103489	-13.1131	2.77053e-39	2.67294e-37
Epb4.1l4a	1284.74	-1.35824	0.121296	-11.1978	4.18203e-29	2.6068e-27
Slc26a2	394.776	-1.35951	0.159891	-8.50273	1.85177e-17	5.5874e-16
Rapgefl1	344.053	-1.36172	0.185097	-7.35682	1.88345e-13	4.22646e-12
Gm3716	52.2036	-1.36413	0.387907	-3.51665	0.000437037	0.00278494
D8Ertd82e	1453.64	-1.36621	0.106309	-12.8514	8.45082e-38	7.52968e-36
Wnt6	137.8	-1.36664	0.310439	-4.40227	1.07126e-05	9.75729e-05
Fbxo40	11.2007	-1.36884	0.392582	-3.48677	0.000488895	0.00307378
Frmpd1	275.79	-1.37184	0.199054	-6.89178	5.50979e-12	1.07133e-10
Kcnh7	13.5603	-1.37311	0.40064	-3.42729	0.000609637	0.00373098
Cpa2	12.2499	-1.37349	0.393926	-3.48668	0.000489061	0.00307378
Gm11992	38.9897	-1.37353	0.389544	-3.526	0.000421881	0.002702
Stap1	10.7842	-1.37421	0.391645	-3.50883	0.00045009	0.00285371
Nbl1	664.964	-1.37554	0.146695	-9.37685	6.79703e-21	2.4989e-19
A930012L18Rik	35.3254	-1.37591	0.379373	-3.62679	0.000286967	0.00191147
D630023F18Rik	54.5954	-1.37944	0.354687	-3.88917	0.000100588	0.000743586
Siva1	2854.23	-1.38031	0.113031	-12.2117	2.69082e-34	2.1228e-32
Pdlim4	228.267	-1.38208	0.237026	-5.83092	5.51215e-09	7.95166e-08
Nell1	153.924	-1.38256	0.291357	-4.74523	2.08272e-06	2.13588e-05
Snx7	508.95	-1.38687	0.18093	-7.6652	1.78556e-14	4.34821e-13
Olfml2b	236.878	-1.39101	0.210034	-6.6228	3.52457e-11	6.37073e-10
Fam124a	125.84	-1.39567	0.296239	-4.7113	2.46141e-06	2.49052e-05
L3mbtl1	38.4338	-1.39682	0.39094	-3.57299	0.000352935	0.00231224
Cpne8	353.997	-1.40483	0.21226	-6.61843	3.63034e-11	6.55408e-10
0610009L18Rik	48.2555	-1.40718	0.354562	-3.96878	7.22429e-05	0.000552751
Kbtbd5	9.90753	-1.40726	0.384459	-3.66035	0.000251868	0.00169784
Cd247	18.9573	-1.40809	0.402569	-3.49776	0.00046919	0.00295748
F3	316.326	-1.4114	0.254794	-5.53939	3.03524e-08	3.9805e-07
Shank3	672.903	-1.41256	0.13674	-10.3302	5.14412e-25	2.48147e-23
Lrig3	1095.96	-1.41291	0.130429	-10.8328	2.40753e-27	1.32607e-25
Adamts8	11.2996	-1.41372	0.396024	-3.56979	0.000357274	0.00233959
Fhl2	136.303	-1.41428	0.24926	-5.67393	1.39559e-08	1.9027e-07
Lgr4	2182.99	-1.41602	0.2296	-6.16735	6.94439e-10	1.10956e-08
Gsdma	10.6541	-1.41694	0.389472	-3.63811	0.00027465	0.00183589
Myc	374.503	-1.42151	0.221897	-6.40617	1.49222e-10	2.54248e-09
4930473A06Rik	424.538	-1.42294	0.175342	-8.11523	4.84848e-16	1.31129e-14
Chst11	967.224	-1.42635	0.119922	-11.894	1.27174e-32	9.3058e-31
Nlgn1	114.444	-1.4269	0.399181	-3.57458	0.00035079	0.00230018
Rbm47	705.424	-1.42704	0.144916	-9.84731	7.04052e-23	2.94593e-21
Atp12a	17.5393	-1.42876	0.403775	-3.53851	0.000402393	0.00259584
Slc50a1	71.4991	-1.43915	0.331649	-4.33938	1.42883e-05	0.000126936
Etohd2	18.5828	-1.4393	0.402187	-3.57868	0.000345333	0.00226782
Tns4	56.7205	-1.44435	0.345085	-4.18549	2.84547e-05	0.000238915
Adamts6	934.596	-1.4495	0.127151	-11.3998	4.19035e-30	2.79609e-28
Hist2h4	943.459	-1.45726	0.133101	-10.9485	6.75265e-28	3.87433e-26
Ndrg1	98.5972	-1.45822	0.34302	-4.25114	2.1269e-05	0.000182218
Parm1	252.927	-1.46207	0.250967	-5.82573	5.68647e-09	8.16426e-08
Atp8b1	1392.48	-1.46256	0.10889	-13.4316	3.94901e-41	4.06909e-39
Adamts15	113.305	-1.46483	0.32084	-4.56561	4.98047e-06	4.82039e-05
Rap1gap2	451.724	-1.46715	0.198779	-7.38081	1.57329e-13	3.55151e-12
Hspa1a	119.493	-1.47579	0.3333	-4.42781	9.51927e-06	8.76526e-05
AI197445	36.7588	-1.47699	0.38247	-3.86171	0.000112597	0.000822325
Stab1	17.2846	-1.4815	0.404114	-3.66606	0.000246318	0.00166562
Isyna1	5916.99	-1.48605	0.0678824	-21.8915	3.12742e-106	1.69182e-103
Fndc1	259.744	-1.48654	0.280308	-5.30324	1.13766e-07	1.41132e-06
Hspb1	994.338	-1.48876	0.139158	-10.6984	1.03607e-26	5.46804e-25
Syt2	56.7631	-1.48899	0.354347	-4.20208	2.64476e-05	0.00022355
Cbr2	55.955	-1.49154	0.343924	-4.33683	1.44549e-05	0.00012834
Nrxn1	65.3059	-1.49155	0.36366	-4.10149	4.10493e-05	0.000330907
Snora33	44.8549	-1.49275	0.370558	-4.02839	5.61598e-05	0.000439614
Gca	366.515	-1.49567	0.194389	-7.69422	1.42358e-14	3.50617e-13
4930594C11Rik	35.1379	-1.49579	0.378422	-3.95269	7.72766e-05	0.000587016
9530036O11Rik	338.292	-1.50417	0.173694	-8.65985	4.72378e-18	1.49703e-16
Spsb1	202.793	-1.51226	0.218686	-6.91522	4.67138e-12	9.15361e-11
Scube3	1201.57	-1.51262	0.139903	-10.8119	3.02284e-27	1.64111e-25
Hspa1b	137.477	-1.51862	0.316646	-4.79596	1.61898e-06	1.70534e-05
Fbxl21	78.9586	-1.52197	0.33435	-4.55204	5.31285e-06	5.10296e-05
Usp18	14.7748	-1.52376	0.401896	-3.79143	0.000149782	0.00105967
Hebp2	89.9376	-1.52923	0.295441	-5.17608	2.26595e-07	2.69195e-06
Atp1b1	1250.96	-1.52995	0.113803	-13.4438	3.347e-41	3.49635e-39
Ank1	93.8821	-1.52999	0.31315	-4.8858	1.03008e-06	1.11607e-05
Slc12a6	1995.32	-1.53241	0.0844063	-18.1551	1.16988e-73	3.40773e-71
Mdga2	36.1874	-1.533	0.375896	-4.07827	4.53718e-05	0.000362281
Rgag1	16.99	-1.53342	0.403273	-3.80244	0.00014328	0.00101938
Ptpn14	5916.87	-1.53435	0.0638458	-24.032	1.28647e-127	8.85734e-125
Bai2	789.687	-1.5374	0.144909	-10.6094	2.69466e-26	1.37427e-24
Apobec1	32.3358	-1.53777	0.401687	-3.82829	0.000129039	0.000931184
Ddx58	515.034	-1.54007	0.161078	-9.561	1.16626e-21	4.52959e-20
Atp2a3	19.5918	-1.54768	0.404462	-3.8265	0.000129979	0.000936625
Fam161a	417.681	-1.55807	0.204377	-7.62351	2.46862e-14	5.90715e-13
Pecr	135.491	-1.5606	0.24801	-6.29249	3.12411e-10	5.16603e-09
Dhrs3	624.282	-1.56496	0.151865	-10.305	6.68964e-25	3.21676e-23
Pmaip1	114.247	-1.56606	0.286994	-5.45677	4.84871e-08	6.25582e-07
Miat	2925.23	-1.56697	0.119669	-13.0942	3.55482e-39	3.38647e-37
Nxph3	53.4273	-1.5691	0.373863	-4.197	2.70473e-05	0.000228364
Tppp	59.5525	-1.57087	0.386609	-4.0632	4.84046e-05	0.000383538
Hs6st3	187.591	-1.57113	0.310821	-5.05476	4.30923e-07	4.93363e-06
Sox9	2721.88	-1.57463	0.108593	-14.5003	1.20565e-47	1.52183e-45
Adrb2	30.705	-1.57723	0.395179	-3.99118	6.57454e-05	0.000506276
Cotl1	2505.26	-1.58802	0.0931738	-17.0436	3.90041e-65	8.68816e-63
Trpc5	18.8276	-1.58864	0.40317	-3.94038	8.1353e-05	0.000612452
N4bp3	314.937	-1.59067	0.212488	-7.48592	7.10468e-14	1.65459e-12
Abat	1011.5	-1.5907	0.10989	-14.4754	1.7337e-47	2.13498e-45
Lpar6	408.605	-1.5942	0.181413	-8.78769	1.52664e-18	4.93049e-17
Eef2k	1931.72	-1.59807	0.116576	-13.7083	9.05396e-43	1.00839e-40
Unc5a	300.952	-1.60154	0.243561	-6.57554	4.84783e-11	8.62869e-10
A3galt2	39.5101	-1.60987	0.369938	-4.35172	1.35073e-05	0.000120562
2900026A02Rik	2431.87	-1.61184	0.0875303	-18.4146	1.00279e-75	3.09985e-73
Plk2	1377.14	-1.61496	0.147847	-10.9232	8.9299e-28	5.08501e-26
Pltp	1339.92	-1.61508	0.151283	-10.6759	1.3191e-26	6.8898e-25
Pik3cg	185.87	-1.61928	0.250994	-6.45149	1.10756e-10	1.90639e-09
Lamc2	1926.14	-1.62245	0.0963622	-16.837	1.30649e-63	2.57006e-61
Npas2	83.2164	-1.62289	0.327022	-4.96263	6.95437e-07	7.67769e-06
Chst2	144.921	-1.62306	0.274929	-5.90356	3.5573e-09	5.24659e-08
Ltbp4	980.096	-1.62517	0.161989	-10.0326	1.09582e-23	4.76964e-22
4933439K11Rik	91.1958	-1.62551	0.310373	-5.23727	1.62969e-07	1.97006e-06
Arhgap40	13.0138	-1.62815	0.39629	-4.10848	3.98264e-05	0.000322077
D230030E09Rik	20.2258	-1.62817	0.403664	-4.03349	5.49555e-05	0.000431301
Zswim3	462.513	-1.63464	0.166961	-9.79051	1.23674e-22	5.07668e-21
Bcas1	44.6923	-1.63548	0.385695	-4.24034	2.23186e-05	0.000190779
Agphd1	98.4394	-1.63928	0.308122	-5.32025	1.03627e-07	1.29083e-06
Ggta1	128.832	-1.64286	0.286597	-5.7323	9.9076e-09	1.38059e-07
Sema3f	1433.91	-1.64661	0.145858	-11.2891	1.48572e-29	9.49546e-28
Pde10a	121.521	-1.65209	0.269011	-6.14132	8.18362e-10	1.29662e-08
Col16a1	111.49	-1.65338	0.273868	-6.03713	1.56876e-09	2.41484e-08
Gpld1	264.064	-1.66347	0.241491	-6.88835	5.64445e-12	1.0933e-10
Chl1	279.088	-1.66414	0.210677	-7.899	2.81148e-15	7.20567e-14
Mctp2	647.781	-1.66979	0.148308	-11.2589	2.09269e-29	1.32627e-27
1700007K13Rik	28.4632	-1.6723	0.400459	-4.17595	2.96745e-05	0.000247238
Ascl4	37.3963	-1.69032	0.388524	-4.35062	1.35756e-05	0.000121101
A330069E16Rik	156.975	-1.69156	0.246479	-6.86292	6.74689e-12	1.29525e-10
Sox2ot	175.031	-1.69558	0.240418	-7.05265	1.75543e-12	3.6078e-11
1810034E14Rik	25.843	-1.69799	0.403876	-4.20424	2.61959e-05	0.00022167
Alpl	600.875	-1.70537	0.158399	-10.7663	4.9675e-27	2.66818e-25
Srd5a1	544.651	-1.70542	0.166853	-10.2211	1.59508e-24	7.43403e-23
4930429B21Rik	43.3007	-1.7087	0.377462	-4.52682	5.9879e-06	5.70419e-05
Muc19	12.4047	-1.7091	0.395604	-4.32024	1.5586e-05	0.000137416
Kit	1977.16	-1.71169	0.10423	-16.4222	1.32698e-60	2.42165e-58
Irf6	2253.88	-1.71202	0.0835358	-20.4944	2.41442e-93	9.62399e-91
Bhlhe40	534.285	-1.71239	0.20953	-8.17252	3.02014e-16	8.28732e-15
Hyal1	659.665	-1.71291	0.151623	-11.2971	1.35596e-29	8.70288e-28
Tgfbr3	245.935	-1.71757	0.251585	-6.82699	8.6716e-12	1.65427e-10
Perp	1517.56	-1.72919	0.298805	-5.78701	7.16506e-09	1.0181e-07
Fermt1	1727.78	-1.73079	0.138156	-12.5278	5.26187e-36	4.47762e-34
Grasp	324.831	-1.73206	0.202711	-8.54448	1.29113e-17	3.9429e-16
Arhgap25	329.391	-1.73464	0.256182	-6.77111	1.27795e-11	2.39271e-10
Klhdc7a	140.9	-1.73698	0.254493	-6.82526	8.77674e-12	1.67222e-10
Ly6g6e	49.3469	-1.7375	0.380519	-4.56614	4.96797e-06	4.81137e-05
Pon3	98.7186	-1.7508	0.301471	-5.80753	6.34017e-09	9.0343e-08
Cpn1	268.834	-1.75192	0.231083	-7.58132	3.42045e-14	8.12062e-13
Prom2	706.714	-1.75224	0.147913	-11.8464	2.24676e-32	1.63614e-30
Nuak2	245.135	-1.7572	0.221335	-7.9391	2.03652e-15	5.2911e-14
Fam83f	190.482	-1.7648	0.267667	-6.5933	4.30166e-11	7.7018e-10
D930048N14Rik	94.5059	-1.77373	0.296308	-5.9861	2.14932e-09	3.26211e-08
Gsto1	360.711	-1.77396	0.2151	-8.24717	1.62194e-16	4.51608e-15
Rgs2	421.249	-1.77506	0.185848	-9.55113	1.28289e-21	4.95713e-20
Fbxo32	520.534	-1.77828	0.154209	-11.5316	9.14005e-31	6.29292e-29
Mep1a	13.4671	-1.78245	0.397387	-4.48542	7.27696e-06	6.82502e-05
Il17rd	708.7	-1.78355	0.177065	-10.0729	7.28344e-24	3.21639e-22
Slitrk6	32.7798	-1.7886	0.404259	-4.42438	9.67212e-06	8.88791e-05
Spred1	4134.24	-1.79469	0.0807496	-22.2253	1.95391e-109	1.09614e-106
1500009L16Rik	510.267	-1.80007	0.183879	-9.78942	1.25015e-22	5.10405e-21
Has2	1060.57	-1.81275	0.159369	-11.3745	5.60277e-30	3.70591e-28
Kcnk16	102.569	-1.81443	0.316015	-5.74158	9.37948e-09	1.31183e-07
Efnb2	3744.42	-1.81733	0.0993543	-18.2915	9.67995e-75	2.87494e-72
Cldn10	88.6557	-1.82188	0.347805	-5.23822	1.62132e-07	1.96307e-06
9330159F19Rik	47.7595	-1.82252	0.393631	-4.63003	3.65607e-06	3.59834e-05
Grm8	19.7712	-1.83069	0.403799	-4.53367	5.79668e-06	5.53958e-05
Spon2	311.307	-1.83114	0.19291	-9.49223	2.26143e-21	8.56347e-20
Reep5	417.32	-1.83245	0.164692	-11.1265	9.32035e-29	5.66969e-27
Sim1	42.8121	-1.83431	0.387078	-4.73886	2.14921e-06	2.1996e-05
Megf11	59.8887	-1.83624	0.328246	-5.59411	2.2175e-08	2.94895e-07
3632451O06Rik	1248.38	-1.85124	0.127386	-14.5325	7.53766e-48	9.75837e-46
Igfn1	24.7619	-1.85881	0.404289	-4.59771	4.27154e-06	4.17157e-05
Ntf5	354.473	-1.86083	0.183175	-10.1587	3.03063e-24	1.3703e-22
Slc39a4	112.424	-1.86323	0.277128	-6.72333	1.77612e-11	3.28084e-10
Fam198b	537.333	-1.86922	0.154382	-12.1077	9.61085e-34	7.3523e-32
Fat2	415.337	-1.87023	0.16533	-11.3121	1.14327e-29	7.43221e-28
Chn2	113.027	-1.89428	0.283004	-6.69347	2.17936e-11	3.97719e-10
Scel	60.5925	-1.90255	0.372277	-5.11056	3.21199e-07	3.73098e-06
Cdkn1a	252.54	-1.90862	0.214235	-8.90903	5.14801e-19	1.72134e-17
Sptlc3	187.559	-1.91392	0.249109	-7.68306	1.55331e-14	3.80097e-13
Dst	19553.5	-1.91457	0.16761	-11.4228	3.21745e-30	2.16599e-28
Tox3	1978.96	-1.9233	0.0893682	-21.5211	9.87054e-103	4.82287e-100
Igfbp2	17400.8	-1.92577	0.0561094	-34.3218	3.71273e-258	1.40592e-254
Krt20	190.291	-1.92847	0.227511	-8.47641	2.32247e-17	6.88424e-16
Krt31	17.3121	-1.93125	0.402843	-4.79405	1.63448e-06	1.71807e-05
Cmtm7	129.078	-1.93652	0.267654	-7.23518	4.64897e-13	1.01613e-11
Hepacam2	20.7545	-1.94205	0.403936	-4.80782	1.52588e-06	1.61175e-05
A830018L16Rik	83.4104	-1.94468	0.310467	-6.26374	3.75863e-10	6.14816e-09
Napepld	742.596	-1.95301	0.128148	-15.2404	1.90813e-52	2.67615e-50
Lrrc4c	29.3532	-1.95465	0.399045	-4.89832	9.66574e-07	1.04876e-05
Hoxc5	730.747	-1.95649	0.192765	-10.1496	3.32771e-24	1.50014e-22
Sfn	2114.37	-1.9757	0.286156	-6.90426	5.04653e-12	9.85049e-11
Fxyd3	136.263	-1.98193	0.282211	-7.02288	2.17348e-12	4.40719e-11
Adam28	690.762	-1.99598	0.164189	-12.1566	5.28843e-34	4.10789e-32
Robo2	1155.69	-2.00166	0.117419	-17.0472	3.66902e-65	8.29472e-63
Dmrtb1	48.3415	-2.00552	0.376932	-5.32065	1.03399e-07	1.28904e-06
Mbnl3	1214.92	-2.01118	0.116321	-17.2899	5.60214e-67	1.36864e-64
Pcsk5	1193.38	-2.0132	0.357906	-5.62493	1.85583e-08	2.49869e-07
Hs3st6	55.1155	-2.01775	0.340068	-5.93336	2.96798e-09	4.42045e-08
Prss23	1018.9	-2.02264	0.108753	-18.5985	3.30481e-77	1.08822e-74
Ptpru	3739.23	-2.02294	0.111741	-18.1037	2.97803e-73	8.51098e-71
Cav2	208.628	-2.03385	0.213208	-9.53923	1.43895e-21	5.546e-20
Itgb5	3393	-2.04385	0.114193	-17.8982	1.21706e-71	3.29193e-69
Ifitm3	322.5	-2.04527	0.363068	-5.6333	1.76796e-08	2.38675e-07
Fgf2	16.4736	-2.04654	0.402094	-5.0897	3.58625e-07	4.14032e-06
Plcd3	204.274	-2.04762	0.252063	-8.12341	4.53252e-16	1.23257e-14
Man1a	545.457	-2.04864	0.215052	-9.52627	1.63038e-21	6.22048e-20
Cmya5	222.667	-2.05031	0.263187	-7.7903	6.68527e-15	1.67375e-13
Adamtsl5	76.8438	-2.05462	0.321677	-6.38721	1.68937e-10	2.86229e-09
Th	131.997	-2.05569	0.289057	-7.11172	1.14603e-12	2.39103e-11
Cdh17	16.4407	-2.0666	0.402387	-5.13584	2.80882e-07	3.3032e-06
Edn1	254.238	-2.07441	0.206229	-10.0588	8.40457e-24	3.68997e-22
Msc	38.2668	-2.08527	0.394983	-5.27939	1.29612e-07	1.59353e-06
Lypd6	788.668	-2.09167	0.156969	-13.3254	1.64823e-40	1.65336e-38
Arc	253.159	-2.10905	0.220764	-9.55341	1.25492e-21	4.86146e-20
Anxa8	1103.7	-2.11365	0.267067	-7.91431	2.4863e-15	6.40475e-14
Cdo1	242.346	-2.11641	0.246037	-8.60198	7.83524e-18	2.45207e-16
Ifih1	80.1503	-2.11923	0.327277	-6.47535	9.45925e-11	1.63935e-09
Pcdh19	148.99	-2.14233	0.265973	-8.05472	7.96612e-16	2.12435e-14
Pcsk9	107.563	-2.14636	0.310302	-6.91702	4.61238e-12	9.06144e-11
Tacr1	315.312	-2.14758	0.218842	-9.81336	9.86264e-23	4.08168e-21
Ifitm1	186.413	-2.15026	0.25697	-8.36777	5.87198e-17	1.68134e-15
Cdc14b	1610.96	-2.15359	0.115988	-18.5675	5.89189e-77	1.89882e-74
Irf8	85.116	-2.16275	0.317808	-6.80521	1.00902e-11	1.90569e-10
Slc2a12	306.623	-2.17367	0.258708	-8.40202	4.38875e-17	1.26863e-15
Nrarp	428.574	-2.17661	0.182188	-11.9471	6.72702e-33	4.99481e-31
Lypd3	19.5083	-2.18021	0.404096	-5.39529	6.84138e-08	8.67892e-07
Trp63	5400.02	-2.18322	0.190608	-11.454	2.24577e-30	1.53228e-28
Slc7a10	58.9472	-2.1859	0.373296	-5.85568	4.75069e-09	6.91246e-08
Lif	17.5399	-2.2037	0.403721	-5.45847	4.80249e-08	6.20147e-07
Sema3d	6302.77	-2.20805	0.0860417	-25.6626	3.0589e-145	3.08888e-142
Camk1d	492.2	-2.2161	0.163483	-13.5556	7.34354e-42	7.88883e-40
Shh	6908.33	-2.22918	0.0801338	-27.8183	2.60891e-170	3.59247e-167
Gnat1	38.5768	-2.23169	0.381943	-5.84299	5.12719e-09	7.43172e-08
Hpgds	288.816	-2.23636	0.223907	-9.98787	1.72239e-23	7.41166e-22
Lgi2	366.287	-2.24542	0.193594	-11.5986	4.18948e-31	2.93787e-29
Col7a1	231.426	-2.28253	0.258969	-8.81394	1.20824e-18	3.92731e-17
Lypd6b	703.329	-2.28722	0.146949	-15.5647	1.26478e-54	1.93511e-52
Fam19a4	164.254	-2.2963	0.265398	-8.65229	5.04765e-18	1.59618e-16
Aim1	356.08	-2.30758	0.226118	-10.2052	1.87963e-24	8.73336e-23
Krt19	1410.97	-2.30831	0.107073	-21.5583	4.42705e-103	2.23522e-100
Fgf9	174.638	-2.32451	0.274065	-8.48162	2.22084e-17	6.60885e-16
Sqrdl	52.1893	-2.32755	0.370344	-6.28485	3.28171e-10	5.41483e-09
Sertad4	1058.67	-2.32903	0.137757	-16.9068	4.01134e-64	8.1013e-62
Kitl	615.957	-2.33367	0.164691	-14.17	1.40499e-45	1.64972e-43
Pon2	636.123	-2.34015	0.185807	-12.5945	2.26405e-36	1.9485e-34
Lancl3	77.8121	-2.34362	0.328354	-7.13748	9.50608e-13	2.01665e-11
Bmp2k	1363.94	-2.36777	0.11436	-20.7044	3.16064e-95	1.36784e-92
Slc45a3	57.2395	-2.41741	0.370306	-6.52815	6.65883e-11	1.16873e-09
Vwa1	161.969	-2.42221	0.292433	-8.28295	1.20158e-16	3.38295e-15
Tubb6	209.863	-2.42736	0.23891	-10.1601	2.9863e-24	1.35429e-22
Ism1	247.751	-2.42753	0.216565	-11.2092	3.67318e-29	2.29908e-27
2310043J07Rik	168.239	-2.43529	0.275764	-8.83104	1.0371e-18	3.37827e-17
Tmem163	82.3225	-2.44322	0.318355	-7.67451	1.66048e-14	4.05012e-13
Bace2	124.023	-2.48866	0.287699	-8.65021	5.14048e-18	1.61877e-16
Pof1b	92.7024	-2.51152	0.352903	-7.11676	1.10493e-12	2.31486e-11
Ntn1	4571.09	-2.52164	0.087065	-28.9627	1.94245e-184	2.94222e-181
Fam49a	618.12	-2.52988	0.153567	-16.4742	5.62507e-61	1.03906e-58
Eya2	1504.4	-2.54872	0.280168	-9.0971	9.27799e-20	3.22325e-18
Bcar3	386.848	-2.55758	0.174853	-14.627	1.88902e-48	2.50991e-46
Sp5	490.694	-2.57378	0.208226	-12.3605	4.27605e-35	3.57842e-33
Dscaml1	170.211	-2.5772	0.269375	-9.56733	1.09702e-21	4.27161e-20
Gpx2	115.555	-2.57859	0.315688	-8.16818	3.13067e-16	8.57508e-15
Rnase4	162.39	-2.57887	0.295504	-8.72703	2.61447e-18	8.40794e-17
Igfbp4	5681.49	-2.59642	0.083094	-31.2467	2.4717e-214	4.67986e-211
Hs6st2	1373.69	-2.61295	0.103438	-25.2611	8.5456e-141	7.61413e-138
Trim29	1369.98	-2.63579	0.29792	-8.8473	8.96596e-19	2.93956e-17
Dcn	2484.31	-2.66577	0.315458	-8.45046	2.90156e-17	8.53397e-16
Edar	104.895	-2.72065	0.30057	-9.05166	1.40815e-19	4.84756e-18
Kcnma1	111.48	-2.72577	0.318666	-8.5537	1.19208e-17	3.66257e-16
Unc13c	63.3117	-2.72633	0.361807	-7.53532	4.87126e-14	1.14573e-12
Zeb2	379.764	-2.79507	0.178408	-15.6667	2.55609e-55	4.03303e-53
Dnajc6	246.626	-2.81296	0.280656	-10.0228	1.21005e-23	5.23676e-22
Klf4	1934.94	-2.82153	0.108932	-25.9017	6.37574e-148	6.89809e-145
Sgpp2	294.145	-2.85231	0.249903	-11.4137	3.5739e-30	2.39531e-28
BC048546	56.9093	-2.85565	0.382447	-7.46678	8.21805e-14	1.89465e-12
Anxa1	1164.26	-2.8588	0.303639	-9.41513	4.72497e-21	1.75415e-19
Erbb4	209.336	-2.86553	0.281056	-10.1956	2.07476e-24	9.5521e-23
Spon1	611.264	-2.91518	0.178295	-16.3503	4.3301e-60	7.8081e-58
Afap1l1	1638.89	-2.9228	0.139184	-20.9995	6.62782e-98	3.04217e-95
Krt15	1493.5	-2.94812	0.331918	-8.88209	6.56131e-19	2.18427e-17
Cd5	28.3421	-2.95695	0.401578	-7.36333	1.79373e-13	4.03709e-12
Col8a1	133.832	-2.9588	0.328903	-8.99596	2.34181e-19	7.98906e-18
Sox21	2860.34	-3.00293	0.113118	-26.5468	2.7973e-155	3.53089e-152
Dusp4	477.984	-3.01597	0.167467	-18.0093	1.64754e-72	4.62135e-70
Cyp26a1	34.9713	-3.02272	0.394644	-7.65936	1.86859e-14	4.52133e-13
Krt17	232.992	-3.06774	0.287224	-10.6807	1.25385e-26	6.57168e-25
Bmp7	1433.99	-3.07647	0.126282	-24.362	4.32199e-131	3.11739e-128
Dlgap1	257.827	-3.07935	0.226982	-13.5665	6.32624e-42	6.89378e-40
Alox12	228.739	-3.14566	0.277226	-11.3469	7.68255e-30	5.03756e-28
Lrig1	6103.9	-3.24145	0.0760858	-42.6025	0	0
Bnc1	215.28	-3.29896	0.25654	-12.8594	7.61219e-38	6.82259e-36
Arsi	62.0431	-3.30313	0.3636	-9.08451	1.04163e-19	3.61043e-18
Vit	135.128	-3.50942	0.322457	-10.8834	1.38316e-27	7.75952e-26
Gas6	219.957	-3.51458	0.284467	-12.355	4.57883e-35	3.81074e-33
Synj2	1711.14	-3.619	0.110847	-32.6488	8.34281e-234	2.52737e-230
Foxq1	275.465	-3.80543	0.224209	-16.9727	1.30863e-64	2.75303e-62
Cabp7	106.148	-3.86477	0.343566	-11.249	2.34283e-29	1.47248e-27
Adcy2	1309.25	-3.93309	0.154396	-25.474	3.83129e-143	3.62704e-140
Notum	1215.53	-3.94219	0.254611	-15.4832	4.50596e-54	6.82518e-52
Lrrc4	1267.96	-4.15265	0.131011	-31.697	1.70779e-220	3.69542e-217
Fbxo43	165.56	-4.16667	0.291501	-14.2938	2.39066e-46	2.87392e-44
Cxcr7	1284.96	-4.45742	0.136613	-32.628	1.64216e-233	4.14564e-230
Hoxc6	130.047	-5.44027	0.349086	-15.5843	9.30691e-55	1.43849e-52
Fam43b	1853.97	-5.45939	0.133617	-40.8586	0	0
Inhbb	434.907	-5.83699	0.24985	-23.3619	1.04231e-120	6.57826e-118
Mnx1	857.643	-6.08767	0.196681	-30.952	2.38935e-210	4.02128e-207
Pitx1	6607.68	-6.17904	0.087292	-70.7859	0	0
